# Supplementary material for: Drp1 is required for AgRP neuronal activity and feeding
Source: eLife. 2021 Mar 9;10:e64351. doi: 10.7554/eLife.64351 (PMC7946429; doi:10.7554/eLife.64351)
Supplement: Figure 1—source data 1. [file elife-64351-fig1-data1.xlsx]

## Sheet: a. Average mitochondrial area
fed	0.1146	0.131571	0.14156	0.145846	0.168667	0.1562	0.178662	0.241692	0.16272	0.140977	0.168571	0.168167	0.214857	0.16825	0.121	0.1973	0.14832	0.089	0.1719	0.186452	0.3288	0.11625	0.17344	0.15958	0.18767	0.2373	0.17014	0.18039	0.18854	0.2281	0.209682	0.18475	0.161333	0.154214	0.245846	0.16125	0.15668	0.19825	0.123538
fasted	0.152893	0.169132	0.18429	0.139778	0.112125	0.0897209	0.104867	0.1131	0.126262	0.176714	0.104176	0.131342	0.150778	0.11513	0.161174	0.122263	0.1085	0.168842	0.0928077	0.105143	0.11	0.146032	0.109686	0.089214	0.129654	0.146885	0.186692	0.148333	0.107	0.041615	0.11857	0.08031	0.1218	0.10527	0.14384	0.159308	0.076533	0.145565	0.128409	0.1397	0.170742	0.127458	0.117167	0.144939	0.145667	0.1325	0.196111

## Sheet: c. Mitochondrial area Proba.
		Fed	Fasted
	0.025	0.001284
	0.035	0.002567
	0.036	0.003851
	0.036	0.005135
	0.037	0.006418
	0.039	0.007702
	0.044	0.008986
	0.045	0.01027
	0.045	0.011553
	0.049	0.012837
	0.05	0.014121
	0.052	0.015404
	0.053	0.016688
	0.053	0.017972
	0.053	0.019255
	0.056	0.020539
	0.056	0.021823
	0.056	0.023107
	0.057	0.02439
	0.058	0.025674
	0.058	0.026958
	0.059	0.028241
	0.06	0.029525
	0.061	0.030809
	0.062	0.032092
	0.062	0.033376
	0.062	0.03466
	0.063	0.035944
	0.064	0.037227
	0.065	0.038511
	0.066	0.039795
	0.066	0.041078
	0.066	0.042362
	0.067	0.043646
	0.067	0.044929
	0.067	0.046213
	0.067	0.047497
	0.068	0.04878
	0.068	0.050064
	0.069	0.051348
	0.07	0.052632
	0.07	0.053915
	0.07	0.055199
	0.072	0.056483
	0.072	0.057766
	0.072	0.05905
	0.073	0.060334
	0.073	0.061617
	0.074	0.062901
	0.074	0.064185
	0.074	0.065469
	0.075	0.066752
	0.075	0.068036
	0.076	0.06932
	0.076	0.070603
	0.076	0.071887
	0.077	0.073171
	0.077	0.074454
	0.077	0.075738
	0.077	0.077022
	0.077	0.078306
	0.079	0.079589
	0.079	0.080873
	0.079	0.082157
	0.079	0.08344
	0.079	0.084724
	0.079	0.086008
	0.079	0.087291
	0.079	0.088575
	0.08	0.089859
	0.082	0.091142
	0.082	0.092426
	0.083	0.09371
	0.083	0.094994
	0.085	0.096277
	0.085	0.097561
	0.085	0.098845
	0.085	0.100128
	0.086	0.101412
	0.087	0.102696
	0.087	0.103979
	0.087	0.105263
	0.087	0.106547
	0.088	0.107831
	0.088	0.109114
	0.088	0.110398
	0.088	0.111682
	0.088	0.112965
	0.089	0.114249
	0.09	0.115533
	0.09	0.116816
	0.09	0.1181
	0.09	0.119384
	0.09	0.120668
	0.091	0.121951
	0.091	0.123235
	0.092	0.124519
	0.092	0.125802
	0.092	0.127086
	0.092	0.12837
	0.092	0.129653
	0.092	0.130937
	0.092	0.132221
	0.092	0.133504
	0.092	0.134788
	0.093	0.136072
	0.094	0.137356
	0.094	0.138639
	0.094	0.139923
	0.094	0.141207
	0.094	0.14249
	0.094	0.143774
	0.095	0.145058
	0.095	0.146341
	0.095	0.147625
	0.095	0.148909
	0.096	0.150193
	0.096	0.151476
	0.096	0.15276
	0.096	0.154044
	0.096	0.155327
	0.096	0.156611
	0.097	0.157895
	0.097	0.159178
	0.097	0.160462
	0.097	0.161746
	0.097	0.16303
	0.097	0.164313
	0.097	0.165597
	0.098	0.166881
	0.098	0.168164
	0.099	0.169448
	0.099	0.170732
	0.099	0.172015
	0.099	0.173299
	0.1	0.174583
	0.1	0.175866
	0.101	0.17715
	0.101	0.178434
	0.101	0.179718
	0.101	0.181001
	0.101	0.182285
	0.102	0.183569
	0.102	0.184852
	0.102	0.186136
	0.103	0.18742
	0.103	0.188703
	0.103	0.189987
	0.103	0.191271
	0.104	0.192555
	0.104	0.193838
	0.104	0.195122
	0.104	0.196406
	0.104	0.197689
	0.104	0.198973
	0.104	0.200257
	0.104	0.20154
	0.104	0.202824
	0.105	0.204108
	0.105	0.205392
	0.106	0.206675
	0.106	0.207959
	0.106	0.209243
	0.106	0.210526
	0.107	0.21181
	0.107	0.213094
	0.107	0.214377
	0.107	0.215661
	0.107	0.216945
	0.107	0.218228
	0.107	0.219512
	0.108	0.220796
	0.108	0.22208
	0.108	0.223363
	0.108	0.224647
	0.108	0.225931
	0.108	0.227214
	0.109	0.228498
	0.109	0.229782
	0.109	0.231065
	0.109	0.232349
	0.11	0.233633
	0.11	0.234917
	0.11	0.2362
	0.11	0.237484
	0.11	0.238768
	0.11	0.240051
	0.11	0.241335
	0.111	0.242619
	0.111	0.243902
	0.111	0.245186
	0.111	0.24647
	0.112	0.247754
	0.112	0.249037
	0.112	0.250321
	0.113	0.251605
	0.113	0.252888
	0.113	0.254172
	0.113	0.255456
	0.113	0.256739
	0.113	0.258023
	0.113	0.259307
	0.113	0.260591
	0.114	0.261874
	0.114	0.263158
	0.114	0.264442
	0.114	0.265725
	0.114	0.267009
	0.114	0.268293
	0.114	0.269576
	0.114	0.27086
	0.114	0.272144
	0.114	0.273427
	0.114	0.274711
	0.114	0.275995
	0.114	0.277279
	0.114	0.278562
	0.115	0.279846
	0.115	0.28113
	0.115	0.282413
	0.115	0.283697
	0.115	0.284981
	0.116	0.286264
	0.116	0.287548
	0.116	0.288832
	0.116	0.290116
	0.117	0.291399
	0.117	0.292683
	0.117	0.293967
	0.117	0.29525
	0.118	0.296534
	0.118	0.297818
	0.118	0.299101
	0.118	0.300385
	0.118	0.301669
	0.119	0.302953
	0.119	0.304236
	0.119	0.30552
	0.12	0.306804
	0.12	0.308087
	0.12	0.309371
	0.12	0.310655
	0.12	0.311938
	0.12	0.313222
	0.12	0.314506
	0.12	0.315789
	0.121	0.317073
	0.121	0.318357
	0.121	0.319641
	0.121	0.320924
	0.121	0.322208
	0.122	0.323492
	0.122	0.324775
	0.122	0.326059
	0.122	0.327343
	0.122	0.328626
	0.122	0.32991
	0.123	0.331194
	0.123	0.332478
	0.123	0.333761
	0.123	0.335045
	0.123	0.336329
	0.123	0.337612
	0.123	0.338896
	0.123	0.34018
	0.123	0.341463
	0.123	0.342747
	0.124	0.344031
	0.124	0.345315
	0.124	0.346598
	0.124	0.347882
	0.124	0.349166
	0.125	0.350449
	0.125	0.351733
	0.125	0.353017
	0.125	0.3543
	0.125	0.355584
	0.125	0.356868
	0.125	0.358151
	0.126	0.359435
	0.126	0.360719
	0.126	0.362003
	0.126	0.363286
	0.126	0.36457
	0.127	0.365854
	0.127	0.367137
	0.127	0.368421
	0.128	0.369705
	0.128	0.370988
	0.128	0.372272
	0.128	0.373556
	0.128	0.37484
	0.129	0.376123
	0.129	0.377407
	0.129	0.378691
	0.129	0.379974
	0.13	0.381258
	0.13	0.382542
	0.131	0.383825
	0.131	0.385109
	0.131	0.386393
	0.131	0.387677
	0.131	0.38896
	0.131	0.390244
	0.131	0.391528
	0.131	0.392811
	0.131	0.394095
	0.131	0.395379
	0.131	0.396662
	0.132	0.397946
	0.132	0.39923
	0.132	0.400513
	0.133	0.401797
	0.133	0.403081
	0.133	0.404365
	0.133	0.405648
	0.133	0.406932
	0.133	0.408216
	0.133	0.409499
	0.133	0.410783
	0.133	0.412067
	0.134	0.41335
	0.134	0.414634
	0.134	0.415918
	0.134	0.417202
	0.134	0.418485
	0.134	0.419769
	0.134	0.421053
	0.134	0.422336
	0.134	0.42362
	0.135	0.424904
	0.135	0.426187
	0.135	0.427471
	0.135	0.428755
	0.135	0.430039
	0.135	0.431322
	0.136	0.432606
	0.136	0.43389
	0.137	0.435173
	0.138	0.436457
	0.138	0.437741
	0.138	0.439024
	0.14	0.440308
	0.14	0.441592
	0.14	0.442875
	0.14	0.444159
	0.14	0.445443
	0.14	0.446727
	0.14	0.44801
	0.14	0.449294
	0.14	0.450578
	0.141	0.451861
	0.142	0.453145
	0.142	0.454429
	0.142	0.455712
	0.142	0.456996
	0.142	0.45828
	0.142	0.459564
	0.142	0.460847
	0.142	0.462131
	0.143	0.463415
	0.143	0.464698
	0.144	0.465982
	0.144	0.467266
	0.144	0.468549
	0.144	0.469833
	0.144	0.471117
	0.145	0.472401
	0.146	0.473684
	0.146	0.474968
	0.146	0.476252
	0.146	0.477535
	0.146	0.478819
	0.146	0.480103
	0.147	0.481386
	0.147	0.48267
	0.147	0.483954
	0.147	0.485237
	0.147	0.486521
	0.147	0.487805
	0.148	0.489089
	0.148	0.490372
	0.148	0.491656
	0.149	0.49294
	0.149	0.494223
	0.15	0.495507
	0.15	0.496791
	0.15	0.498074
	0.15	0.499358
	0.15	0.500642
	0.15	0.501926
	0.15	0.503209
	0.151	0.504493
	0.151	0.505777
	0.151	0.50706
	0.151	0.508344
	0.151	0.509628
	0.152	0.510911
	0.152	0.512195
	0.152	0.513479
	0.152	0.514763
	0.153	0.516046
	0.153	0.51733
	0.153	0.518614
	0.153	0.519897
	0.153	0.521181
	0.153	0.522465
	0.153	0.523748
	0.153	0.525032
	0.153	0.526316
	0.153	0.527599
	0.154	0.528883
	0.154	0.530167
	0.154	0.531451
	0.155	0.532734
	0.155	0.534018
	0.156	0.535302
	0.156	0.536585
	0.156	0.537869
	0.157	0.539153
	0.157	0.540436
	0.157	0.54172
	0.157	0.543004
	0.158	0.544288
	0.158	0.545571
	0.158	0.546855
	0.158	0.548139
	0.159	0.549422
	0.159	0.550706
	0.16	0.55199
	0.16	0.553273
	0.16	0.554557
	0.16	0.555841
	0.16	0.557125
	0.16	0.558408
	0.16	0.559692
	0.16	0.560976
	0.16	0.562259
	0.161	0.563543
	0.161	0.564827
	0.161	0.56611
	0.161	0.567394
	0.162	0.568678
	0.162	0.569961
	0.162	0.571245
	0.162	0.572529
	0.162	0.573813
	0.164	0.575096
	0.165	0.57638
	0.165	0.577664
	0.166	0.578947
	0.166	0.580231
	0.166	0.581515
	0.166	0.582798
	0.166	0.584082
	0.166	0.585366
	0.166	0.58665
	0.167	0.587933
	0.167	0.589217
	0.167	0.590501
	0.167	0.591784
	0.167	0.593068
	0.167	0.594352
	0.167	0.595635
	0.168	0.596919
	0.168	0.598203
	0.169	0.599487
	0.169	0.60077
	0.169	0.602054
	0.169	0.603338
	0.169	0.604621
	0.17	0.605905
	0.17	0.607189
	0.17	0.608472
	0.17	0.609756
	0.171	0.61104
	0.171	0.612323
	0.171	0.613607
	0.171	0.614891
	0.171	0.616175
	0.171	0.617458
	0.171	0.618742
	0.172	0.620026
	0.172	0.621309
	0.173	0.622593
	0.173	0.623877
	0.174	0.62516
	0.174	0.626444
	0.174	0.627728
	0.175	0.629012
	0.175	0.630295
	0.176	0.631579
	0.176	0.632863
	0.176	0.634146
	0.176	0.63543
	0.176	0.636714
	0.177	0.637997
	0.177	0.639281
	0.177	0.640565
	0.178	0.641849
	0.178	0.643132
	0.178	0.644416
	0.179	0.6457
	0.179	0.646983
	0.179	0.648267
	0.179	0.649551
	0.179	0.650834
	0.179	0.652118
	0.179	0.653402
	0.179	0.654685
	0.18	0.655969
	0.181	0.657253
	0.181	0.658537
	0.181	0.65982
	0.181	0.661104
	0.182	0.662388
	0.182	0.663671
	0.183	0.664955
	0.183	0.666239
	0.184	0.667522
	0.184	0.668806
	0.185	0.67009
	0.185	0.671374
	0.185	0.672657
	0.185	0.673941
	0.185	0.675225
	0.185	0.676508
	0.185	0.677792
	0.185	0.679076
	0.186	0.680359
	0.186	0.681643
	0.187	0.682927
	0.187	0.684211
	0.188	0.685494
	0.188	0.686778
	0.189	0.688062
	0.189	0.689345
	0.189	0.690629
	0.189	0.691913
	0.189	0.693196
	0.189	0.69448
	0.19	0.695764
	0.19	0.697047
	0.19	0.698331
	0.191	0.699615
	0.192	0.700899
	0.193	0.702182
	0.193	0.703466
	0.193	0.70475
	0.194	0.706033
	0.194	0.707317
	0.194	0.708601
	0.195	0.709884
	0.195	0.711168
	0.195	0.712452
	0.196	0.713736
	0.197	0.715019
	0.198	0.716303
	0.198	0.717587
	0.198	0.71887
	0.199	0.720154
	0.2	0.721438
	0.2	0.722721
	0.2	0.724005
	0.2	0.725289
	0.201	0.726573
	0.201	0.727856
	0.201	0.72914
	0.202	0.730424
	0.202	0.731707
	0.202	0.732991
	0.202	0.734275
	0.204	0.735558
	0.204	0.736842
	0.204	0.738126
	0.205	0.739409
	0.206	0.740693
	0.206	0.741977
	0.207	0.743261
	0.207	0.744544
	0.207	0.745828
	0.208	0.747112
	0.208	0.748395
	0.208	0.749679
	0.209	0.750963
	0.211	0.752246
	0.213	0.75353
	0.213	0.754814
	0.214	0.756098
	0.214	0.757381
	0.215	0.758665
	0.215	0.759949
	0.216	0.761232
	0.217	0.762516
	0.217	0.7638
	0.217	0.765083
	0.218	0.766367
	0.219	0.767651
	0.22	0.768935
	0.22	0.770218
	0.221	0.771502
	0.221	0.772786
	0.222	0.774069
	0.222	0.775353
	0.224	0.776637
	0.224	0.77792
	0.225	0.779204
	0.225	0.780488
	0.225	0.781772
	0.226	0.783055
	0.226	0.784339
	0.227	0.785623
	0.227	0.786906
	0.227	0.78819
	0.228	0.789474
	0.23	0.790757
	0.23	0.792041
	0.23	0.793325
	0.23	0.794608
	0.232	0.795892
	0.233	0.797176
	0.234	0.79846
	0.235	0.799743
	0.235	0.801027
	0.236	0.802311
	0.236	0.803594
	0.236	0.804878
	0.236	0.806162
	0.238	0.807445
	0.238	0.808729
	0.238	0.810013
	0.239	0.811297
	0.239	0.81258
	0.239	0.813864
	0.239	0.815148
	0.24	0.816431
	0.24	0.817715
	0.241	0.818999
	0.242	0.820282
	0.242	0.821566
	0.243	0.82285
	0.243	0.824134
	0.243	0.825417
	0.244	0.826701
	0.244	0.827985
	0.245	0.829268
	0.246	0.830552
	0.247	0.831836
	0.247	0.833119
	0.248	0.834403
	0.249	0.835687
	0.249	0.83697
	0.249	0.838254
	0.251	0.839538
	0.252	0.840822
	0.253	0.842105
	0.254	0.843389
	0.254	0.844673
	0.255	0.845956
	0.256	0.84724
	0.256	0.848524
	0.257	0.849807
	0.257	0.851091
	0.258	0.852375
	0.259	0.853659
	0.259	0.854942
	0.26	0.856226
	0.26	0.85751
	0.261	0.858793
	0.261	0.860077
	0.261	0.861361
	0.262	0.862644
	0.262	0.863928
	0.262	0.865212
	0.262	0.866496
	0.262	0.867779
	0.263	0.869063
	0.263	0.870347
	0.264	0.87163
	0.266	0.872914
	0.266	0.874198
	0.267	0.875481
	0.268	0.876765
	0.27	0.878049
	0.274	0.879332
	0.274	0.880616
	0.276	0.8819
	0.276	0.883184
	0.278	0.884467
	0.279	0.885751
	0.28	0.887035
	0.286	0.888318
	0.287	0.889602
	0.287	0.890886
	0.288	0.892169
	0.291	0.893453
	0.294	0.894737
	0.294	0.896021
	0.295	0.897304
	0.297	0.898588
	0.298	0.899872
	0.299	0.901155
	0.301	0.902439
	0.301	0.903723
	0.302	0.905006
	0.308	0.90629
	0.313	0.907574
	0.316	0.908858
	0.316	0.910141
	0.317	0.911425
	0.318	0.912709
	0.32	0.913992
	0.321	0.915276
	0.323	0.91656
	0.323	0.917843
	0.324	0.919127
	0.324	0.920411
	0.325	0.921694
	0.325	0.922978
	0.332	0.924262
	0.334	0.925546
	0.335	0.926829
	0.335	0.928113
	0.335	0.929397
	0.335	0.93068
	0.337	0.931964
	0.338	0.933248
	0.339	0.934531
	0.34	0.935815
	0.341	0.937099
	0.342	0.938383
	0.348	0.939666
	0.353	0.94095
	0.355	0.942234
	0.358	0.943517
	0.365	0.944801
	0.366	0.946085
	0.367	0.947368
	0.367	0.948652
	0.367	0.949936
	0.371	0.95122
	0.371	0.952503
	0.371	0.953787
	0.372	0.955071
	0.373	0.956354
	0.375	0.957638
	0.377	0.958922
	0.384	0.960205
	0.386	0.961489
	0.388	0.962773
	0.39	0.964056
	0.395	0.96534
	0.397	0.966624
	0.404	0.967908
	0.405	0.969191
	0.412	0.970475
	0.415	0.971759
	0.425	0.973042
	0.429	0.974326
	0.447	0.97561
	0.452	0.976893
	0.459	0.978177
	0.469	0.979461
	0.475	0.980745
	0.491	0.982028
	0.495	0.983312
	0.499	0.984596
	0.5	0.985879
	0.507	0.987163
	0.518	0.988447
	0.52	0.98973
	0.531	0.991014
	0.54	0.992298
	0.577	0.993582
	0.587	0.994865
	0.599	0.996149
	0.603	0.997433
	0.662	0.998716
	0.848	1
	0.006		0.000641
	0.008		0.001283
	0.009		0.001924
	0.009		0.002566
	0.01		0.003207
	0.011		0.003849
	0.012		0.00449
	0.013		0.005131
	0.013		0.005773
	0.013		0.006414
	0.013		0.007056
	0.014		0.007697
	0.014		0.008339
	0.014		0.00898
	0.014		0.009622
	0.015		0.010263
	0.015		0.010904
	0.015		0.011546
	0.016		0.012187
	0.016		0.012829
	0.016		0.01347
	0.016		0.014112
	0.016		0.014753
	0.017		0.015394
	0.017		0.016036
	0.018		0.016677
	0.018		0.017319
	0.018		0.01796
	0.018		0.018602
	0.018		0.019243
	0.018		0.019885
	0.018		0.020526
	0.019		0.021167
	0.02		0.021809
	0.021		0.02245
	0.021		0.023092
	0.021		0.023733
	0.023		0.024375
	0.023		0.025016
	0.023		0.025657
	0.023		0.026299
	0.023		0.02694
	0.023		0.027582
	0.023		0.028223
	0.023		0.028865
	0.023		0.029506
	0.023		0.030148
	0.024		0.030789
	0.024		0.03143
	0.024		0.032072
	0.025		0.032713
	0.025		0.033355
	0.025		0.033996
	0.026		0.034638
	0.026		0.035279
	0.026		0.03592
	0.027		0.036562
	0.027		0.037203
	0.027		0.037845
	0.027		0.038486
	0.027		0.039128
	0.027		0.039769
	0.028		0.040411
	0.028		0.041052
	0.028		0.041693
	0.029		0.042335
	0.029		0.042976
	0.029		0.043618
	0.029		0.044259
	0.029		0.044901
	0.03		0.045542
	0.03		0.046183
	0.03		0.046825
	0.03		0.047466
	0.03		0.048108
	0.03		0.048749
	0.031		0.049391
	0.031		0.050032
	0.032		0.050674
	0.033		0.051315
	0.034		0.051956
	0.034		0.052598
	0.034		0.053239
	0.034		0.053881
	0.034		0.054522
	0.034		0.055164
	0.034		0.055805
	0.035		0.056446
	0.035		0.057088
	0.035		0.057729
	0.035		0.058371
	0.035		0.059012
	0.035		0.059654
	0.036		0.060295
	0.036		0.060936
	0.036		0.061578
	0.036		0.062219
	0.037		0.062861
	0.038		0.063502
	0.038		0.064144
	0.038		0.064785
	0.039		0.065427
	0.039		0.066068
	0.039		0.066709
	0.039		0.067351
	0.039		0.067992
	0.04		0.068634
	0.04		0.069275
	0.04		0.069917
	0.04		0.070558
	0.04		0.071199
	0.04		0.071841
	0.04		0.072482
	0.04		0.073124
	0.04		0.073765
	0.041		0.074407
	0.041		0.075048
	0.042		0.07569
	0.042		0.076331
	0.042		0.076972
	0.042		0.077614
	0.042		0.078255
	0.043		0.078897
	0.043		0.079538
	0.043		0.08018
	0.043		0.080821
	0.043		0.081462
	0.043		0.082104
	0.043		0.082745
	0.043		0.083387
	0.043		0.084028
	0.043		0.08467
	0.043		0.085311
	0.043		0.085953
	0.043		0.086594
	0.044		0.087235
	0.044		0.087877
	0.044		0.088518
	0.044		0.08916
	0.044		0.089801
	0.044		0.090443
	0.044		0.091084
	0.045		0.091725
	0.045		0.092367
	0.045		0.093008
	0.045		0.09365
	0.045		0.094291
	0.045		0.094933
	0.046		0.095574
	0.046		0.096216
	0.046		0.096857
	0.046		0.097498
	0.046		0.09814
	0.047		0.098781
	0.047		0.099423
	0.047		0.100064
	0.047		0.100706
	0.047		0.101347
	0.047		0.101988
	0.048		0.10263
	0.048		0.103271
	0.048		0.103913
	0.048		0.104554
	0.048		0.105196
	0.048		0.105837
	0.048		0.106479
	0.048		0.10712
	0.048		0.107761
	0.048		0.108403
	0.049		0.109044
	0.049		0.109686
	0.049		0.110327
	0.049		0.110969
	0.049		0.11161
	0.049		0.112251
	0.049		0.112893
	0.049		0.113534
	0.049		0.114176
	0.049		0.114817
	0.049		0.115459
	0.049		0.1161
	0.049		0.116742
	0.049		0.117383
	0.05		0.118024
	0.05		0.118666
	0.05		0.119307
	0.05		0.119949
	0.05		0.12059
	0.05		0.121232
	0.05		0.121873
	0.051		0.122514
	0.051		0.123156
	0.051		0.123797
	0.051		0.124439
	0.051		0.12508
	0.051		0.125722
	0.052		0.126363
	0.052		0.127004
	0.052		0.127646
	0.052		0.128287
	0.052		0.128929
	0.052		0.12957
	0.052		0.130212
	0.052		0.130853
	0.053		0.131495
	0.053		0.132136
	0.053		0.132777
	0.053		0.133419
	0.053		0.13406
	0.053		0.134702
	0.053		0.135343
	0.053		0.135985
	0.054		0.136626
	0.054		0.137267
	0.054		0.137909
	0.054		0.13855
	0.054		0.139192
	0.054		0.139833
	0.054		0.140475
	0.055		0.141116
	0.055		0.141758
	0.055		0.142399
	0.056		0.14304
	0.056		0.143682
	0.056		0.144323
	0.056		0.144965
	0.056		0.145606
	0.056		0.146248
	0.057		0.146889
	0.057		0.14753
	0.057		0.148172
	0.057		0.148813
	0.057		0.149455
	0.057		0.150096
	0.057		0.150738
	0.057		0.151379
	0.057		0.152021
	0.057		0.152662
	0.057		0.153303
	0.057		0.153945
	0.058		0.154586
	0.058		0.155228
	0.058		0.155869
	0.058		0.156511
	0.058		0.157152
	0.058		0.157793
	0.059		0.158435
	0.059		0.159076
	0.059		0.159718
	0.059		0.160359
	0.059		0.161001
	0.059		0.161642
	0.059		0.162284
	0.059		0.162925
	0.059		0.163566
	0.06		0.164208
	0.06		0.164849
	0.06		0.165491
	0.06		0.166132
	0.06		0.166774
	0.06		0.167415
	0.06		0.168056
	0.06		0.168698
	0.06		0.169339
	0.06		0.169981
	0.061		0.170622
	0.061		0.171264
	0.061		0.171905
	0.061		0.172547
	0.061		0.173188
	0.061		0.173829
	0.061		0.174471
	0.061		0.175112
	0.061		0.175754
	0.061		0.176395
	0.061		0.177037
	0.061		0.177678
	0.061		0.178319
	0.062		0.178961
	0.062		0.179602
	0.062		0.180244
	0.062		0.180885
	0.062		0.181527
	0.062		0.182168
	0.062		0.182809
	0.062		0.183451
	0.063		0.184092
	0.063		0.184734
	0.063		0.185375
	0.063		0.186017
	0.063		0.186658
	0.063		0.1873
	0.063		0.187941
	0.063		0.188582
	0.063		0.189224
	0.063		0.189865
	0.063		0.190507
	0.063		0.191148
	0.063		0.19179
	0.064		0.192431
	0.064		0.193072
	0.064		0.193714
	0.064		0.194355
	0.064		0.194997
	0.064		0.195638
	0.065		0.19628
	0.065		0.196921
	0.065		0.197563
	0.065		0.198204
	0.065		0.198845
	0.065		0.199487
	0.066		0.200128
	0.066		0.20077
	0.066		0.201411
	0.066		0.202053
	0.066		0.202694
	0.066		0.203335
	0.066		0.203977
	0.066		0.204618
	0.067		0.20526
	0.067		0.205901
	0.067		0.206543
	0.067		0.207184
	0.067		0.207826
	0.068		0.208467
	0.068		0.209108
	0.068		0.20975
	0.068		0.210391
	0.069		0.211033
	0.069		0.211674
	0.069		0.212316
	0.069		0.212957
	0.069		0.213598
	0.069		0.21424
	0.069		0.214881
	0.069		0.215523
	0.069		0.216164
	0.069		0.216806
	0.069		0.217447
	0.069		0.218089
	0.069		0.21873
	0.07		0.219371
	0.07		0.220013
	0.07		0.220654
	0.07		0.221296
	0.07		0.221937
	0.07		0.222579
	0.07		0.22322
	0.07		0.223861
	0.07		0.224503
	0.07		0.225144
	0.071		0.225786
	0.071		0.226427
	0.071		0.227069
	0.071		0.22771
	0.071		0.228352
	0.071		0.228993
	0.071		0.229634
	0.071		0.230276
	0.071		0.230917
	0.071		0.231559
	0.071		0.2322
	0.071		0.232842
	0.071		0.233483
	0.071		0.234124
	0.071		0.234766
	0.071		0.235407
	0.071		0.236049
	0.072		0.23669
	0.072		0.237332
	0.072		0.237973
	0.072		0.238614
	0.072		0.239256
	0.072		0.239897
	0.072		0.240539
	0.072		0.24118
	0.072		0.241822
	0.073		0.242463
	0.073		0.243105
	0.073		0.243746
	0.073		0.244387
	0.073		0.245029
	0.073		0.24567
	0.073		0.246312
	0.073		0.246953
	0.073		0.247595
	0.073		0.248236
	0.074		0.248877
	0.074		0.249519
	0.074		0.25016
	0.074		0.250802
	0.074		0.251443
	0.074		0.252085
	0.075		0.252726
	0.075		0.253368
	0.075		0.254009
	0.075		0.25465
	0.075		0.255292
	0.075		0.255933
	0.075		0.256575
	0.075		0.257216
	0.075		0.257858
	0.076		0.258499
	0.076		0.25914
	0.076		0.259782
	0.076		0.260423
	0.076		0.261065
	0.076		0.261706
	0.076		0.262348
	0.076		0.262989
	0.076		0.263631
	0.077		0.264272
	0.077		0.264913
	0.077		0.265555
	0.077		0.266196
	0.077		0.266838
	0.077		0.267479
	0.077		0.268121
	0.077		0.268762
	0.077		0.269403
	0.077		0.270045
	0.078		0.270686
	0.078		0.271328
	0.078		0.271969
	0.078		0.272611
	0.078		0.273252
	0.078		0.273894
	0.078		0.274535
	0.078		0.275176
	0.078		0.275818
	0.078		0.276459
	0.078		0.277101
	0.079		0.277742
	0.079		0.278384
	0.079		0.279025
	0.079		0.279666
	0.079		0.280308
	0.079		0.280949
	0.079		0.281591
	0.079		0.282232
	0.079		0.282874
	0.079		0.283515
	0.079		0.284157
	0.08		0.284798
	0.08		0.285439
	0.08		0.286081
	0.08		0.286722
	0.08		0.287364
	0.08		0.288005
	0.08		0.288647
	0.08		0.289288
	0.081		0.289929
	0.081		0.290571
	0.081		0.291212
	0.081		0.291854
	0.081		0.292495
	0.081		0.293137
	0.081		0.293778
	0.081		0.294419
	0.081		0.295061
	0.082		0.295702
	0.082		0.296344
	0.082		0.296985
	0.082		0.297627
	0.082		0.298268
	0.082		0.29891
	0.082		0.299551
	0.082		0.300192
	0.082		0.300834
	0.083		0.301475
	0.083		0.302117
	0.083		0.302758
	0.083		0.3034
	0.083		0.304041
	0.083		0.304682
	0.083		0.305324
	0.083		0.305965
	0.083		0.306607
	0.083		0.307248
	0.083		0.30789
	0.083		0.308531
	0.083		0.309173
	0.083		0.309814
	0.083		0.310455
	0.083		0.311097
	0.083		0.311738
	0.084		0.31238
	0.084		0.313021
	0.084		0.313663
	0.084		0.314304
	0.084		0.314945
	0.084		0.315587
	0.084		0.316228
	0.084		0.31687
	0.084		0.317511
	0.084		0.318153
	0.084		0.318794
	0.084		0.319436
	0.084		0.320077
	0.084		0.320718
	0.084		0.32136
	0.084		0.322001
	0.085		0.322643
	0.085		0.323284
	0.085		0.323926
	0.085		0.324567
	0.085		0.325208
	0.085		0.32585
	0.085		0.326491
	0.085		0.327133
	0.085		0.327774
	0.086		0.328416
	0.086		0.329057
	0.086		0.329699
	0.086		0.33034
	0.086		0.330981
	0.086		0.331623
	0.086		0.332264
	0.086		0.332906
	0.086		0.333547
	0.087		0.334189
	0.087		0.33483
	0.087		0.335471
	0.087		0.336113
	0.088		0.336754
	0.088		0.337396
	0.088		0.338037
	0.088		0.338679
	0.088		0.33932
	0.088		0.339962
	0.088		0.340603
	0.088		0.341244
	0.088		0.341886
	0.088		0.342527
	0.089		0.343169
	0.089		0.34381
	0.089		0.344452
	0.089		0.345093
	0.089		0.345734
	0.089		0.346376
	0.089		0.347017
	0.089		0.347659
	0.089		0.3483
	0.089		0.348942
	0.089		0.349583
	0.089		0.350225
	0.089		0.350866
	0.09		0.351507
	0.09		0.352149
	0.09		0.35279
	0.09		0.353432
	0.09		0.354073
	0.09		0.354715
	0.09		0.355356
	0.09		0.355997
	0.09		0.356639
	0.09		0.35728
	0.09		0.357922
	0.091		0.358563
	0.091		0.359205
	0.091		0.359846
	0.091		0.360487
	0.091		0.361129
	0.091		0.36177
	0.091		0.362412
	0.091		0.363053
	0.091		0.363695
	0.091		0.364336
	0.092		0.364978
	0.092		0.365619
	0.092		0.36626
	0.092		0.366902
	0.092		0.367543
	0.092		0.368185
	0.092		0.368826
	0.092		0.369468
	0.092		0.370109
	0.092		0.37075
	0.092		0.371392
	0.092		0.372033
	0.092		0.372675
	0.092		0.373316
	0.092		0.373958
	0.092		0.374599
	0.093		0.375241
	0.093		0.375882
	0.093		0.376523
	0.093		0.377165
	0.093		0.377806
	0.093		0.378448
	0.093		0.379089
	0.093		0.379731
	0.093		0.380372
	0.093		0.381013
	0.093		0.381655
	0.093		0.382296
	0.093		0.382938
	0.093		0.383579
	0.094		0.384221
	0.094		0.384862
	0.094		0.385504
	0.094		0.386145
	0.094		0.386786
	0.094		0.387428
	0.094		0.388069
	0.094		0.388711
	0.094		0.389352
	0.094		0.389994
	0.094		0.390635
	0.095		0.391276
	0.095		0.391918
	0.095		0.392559
	0.095		0.393201
	0.095		0.393842
	0.095		0.394484
	0.095		0.395125
	0.095		0.395767
	0.095		0.396408
	0.095		0.397049
	0.096		0.397691
	0.096		0.398332
	0.096		0.398974
	0.096		0.399615
	0.096		0.400257
	0.096		0.400898
	0.096		0.401539
	0.096		0.402181
	0.096		0.402822
	0.096		0.403464
	0.096		0.404105
	0.096		0.404747
	0.096		0.405388
	0.096		0.40603
	0.096		0.406671
	0.096		0.407312
	0.096		0.407954
	0.097		0.408595
	0.097		0.409237
	0.097		0.409878
	0.097		0.41052
	0.097		0.411161
	0.097		0.411802
	0.097		0.412444
	0.097		0.413085
	0.097		0.413727
	0.097		0.414368
	0.097		0.41501
	0.097		0.415651
	0.097		0.416292
	0.097		0.416934
	0.098		0.417575
	0.098		0.418217
	0.098		0.418858
	0.098		0.4195
	0.098		0.420141
	0.098		0.420783
	0.098		0.421424
	0.098		0.422065
	0.098		0.422707
	0.098		0.423348
	0.098		0.42399
	0.098		0.424631
	0.099		0.425273
	0.099		0.425914
	0.099		0.426555
	0.099		0.427197
	0.099		0.427838
	0.099		0.42848
	0.1		0.429121
	0.1		0.429763
	0.1		0.430404
	0.1		0.431046
	0.1		0.431687
	0.1		0.432328
	0.1		0.43297
	0.1		0.433611
	0.1		0.434253
	0.1		0.434894
	0.1		0.435536
	0.1		0.436177
	0.1		0.436818
	0.1		0.43746
	0.1		0.438101
	0.101		0.438743
	0.101		0.439384
	0.101		0.440026
	0.101		0.440667
	0.101		0.441309
	0.101		0.44195
	0.101		0.442591
	0.101		0.443233
	0.101		0.443874
	0.101		0.444516
	0.101		0.445157
	0.101		0.445799
	0.101		0.44644
	0.101		0.447081
	0.101		0.447723
	0.102		0.448364
	0.102		0.449006
	0.102		0.449647
	0.102		0.450289
	0.102		0.45093
	0.102		0.451572
	0.103		0.452213
	0.103		0.452854
	0.103		0.453496
	0.103		0.454137
	0.103		0.454779
	0.103		0.45542
	0.103		0.456062
	0.103		0.456703
	0.104		0.457344
	0.104		0.457986
	0.104		0.458627
	0.104		0.459269
	0.104		0.45991
	0.104		0.460552
	0.104		0.461193
	0.104		0.461835
	0.104		0.462476
	0.105		0.463117
	0.105		0.463759
	0.105		0.4644
	0.105		0.465042
	0.105		0.465683
	0.106		0.466325
	0.106		0.466966
	0.106		0.467607
	0.106		0.468249
	0.106		0.46889
	0.106		0.469532
	0.106		0.470173
	0.106		0.470815
	0.106		0.471456
	0.106		0.472097
	0.106		0.472739
	0.106		0.47338
	0.107		0.474022
	0.107		0.474663
	0.107		0.475305
	0.107		0.475946
	0.107		0.476588
	0.107		0.477229
	0.107		0.47787
	0.107		0.478512
	0.108		0.479153
	0.108		0.479795
	0.108		0.480436
	0.108		0.481078
	0.108		0.481719
	0.108		0.48236
	0.108		0.483002
	0.108		0.483643
	0.108		0.484285
	0.108		0.484926
	0.109		0.485568
	0.109		0.486209
	0.109		0.486851
	0.109		0.487492
	0.109		0.488133
	0.109		0.488775
	0.109		0.489416
	0.109		0.490058
	0.109		0.490699
	0.11		0.491341
	0.11		0.491982
	0.11		0.492623
	0.11		0.493265
	0.11		0.493906
	0.11		0.494548
	0.11		0.495189
	0.11		0.495831
	0.11		0.496472
	0.11		0.497114
	0.11		0.497755
	0.11		0.498396
	0.11		0.499038
	0.11		0.499679
	0.11		0.500321
	0.11		0.500962
	0.11		0.501604
	0.11		0.502245
	0.11		0.502886
	0.11		0.503528
	0.11		0.504169
	0.11		0.504811
	0.111		0.505452
	0.111		0.506094
	0.111		0.506735
	0.111		0.507377
	0.111		0.508018
	0.111		0.508659
	0.111		0.509301
	0.111		0.509942
	0.111		0.510584
	0.111		0.511225
	0.112		0.511867
	0.112		0.512508
	0.112		0.513149
	0.112		0.513791
	0.112		0.514432
	0.112		0.515074
	0.112		0.515715
	0.112		0.516357
	0.112		0.516998
	0.112		0.51764
	0.112		0.518281
	0.112		0.518922
	0.112		0.519564
	0.112		0.520205
	0.112		0.520847
	0.112		0.521488
	0.112		0.52213
	0.112		0.522771
	0.113		0.523412
	0.113		0.524054
	0.113		0.524695
	0.113		0.525337
	0.113		0.525978
	0.113		0.52662
	0.113		0.527261
	0.113		0.527903
	0.113		0.528544
	0.114		0.529185
	0.114		0.529827
	0.114		0.530468
	0.114		0.53111
	0.115		0.531751
	0.115		0.532393
	0.115		0.533034
	0.115		0.533675
	0.115		0.534317
	0.115		0.534958
	0.115		0.5356
	0.115		0.536241
	0.116		0.536883
	0.116		0.537524
	0.116		0.538165
	0.116		0.538807
	0.116		0.539448
	0.116		0.54009
	0.117		0.540731
	0.117		0.541373
	0.117		0.542014
	0.117		0.542656
	0.117		0.543297
	0.117		0.543938
	0.117		0.54458
	0.118		0.545221
	0.118		0.545863
	0.118		0.546504
	0.118		0.547146
	0.118		0.547787
	0.118		0.548428
	0.118		0.54907
	0.118		0.549711
	0.118		0.550353
	0.118		0.550994
	0.119		0.551636
	0.119		0.552277
	0.119		0.552919
	0.119		0.55356
	0.119		0.554201
	0.119		0.554843
	0.119		0.555484
	0.119		0.556126
	0.119		0.556767
	0.119		0.557409
	0.119		0.55805
	0.119		0.558691
	0.119		0.559333
	0.119		0.559974
	0.12		0.560616
	0.12		0.561257
	0.12		0.561899
	0.12		0.56254
	0.121		0.563182
	0.121		0.563823
	0.121		0.564464
	0.121		0.565106
	0.122		0.565747
	0.122		0.566389
	0.122		0.56703
	0.122		0.567672
	0.122		0.568313
	0.122		0.568954
	0.122		0.569596
	0.122		0.570237
	0.123		0.570879
	0.123		0.57152
	0.123		0.572162
	0.123		0.572803
	0.123		0.573445
	0.123		0.574086
	0.123		0.574727
	0.123		0.575369
	0.123		0.57601
	0.123		0.576652
	0.123		0.577293
	0.124		0.577935
	0.124		0.578576
	0.124		0.579217
	0.124		0.579859
	0.124		0.5805
	0.124		0.581142
	0.124		0.581783
	0.124		0.582425
	0.124		0.583066
	0.125		0.583708
	0.125		0.584349
	0.125		0.58499
	0.125		0.585632
	0.125		0.586273
	0.125		0.586915
	0.125		0.587556
	0.125		0.588198
	0.125		0.588839
	0.125		0.58948
	0.126		0.590122
	0.126		0.590763
	0.126		0.591405
	0.126		0.592046
	0.127		0.592688
	0.127		0.593329
	0.127		0.59397
	0.127		0.594612
	0.127		0.595253
	0.127		0.595895
	0.127		0.596536
	0.127		0.597178
	0.128		0.597819
	0.128		0.598461
	0.128		0.599102
	0.128		0.599743
	0.128		0.600385
	0.128		0.601026
	0.128		0.601668
	0.128		0.602309
	0.128		0.602951
	0.129		0.603592
	0.129		0.604233
	0.129		0.604875
	0.129		0.605516
	0.13		0.606158
	0.13		0.606799
	0.13		0.607441
	0.13		0.608082
	0.13		0.608724
	0.13		0.609365
	0.13		0.610006
	0.13		0.610648
	0.131		0.611289
	0.131		0.611931
	0.131		0.612572
	0.131		0.613214
	0.131		0.613855
	0.131		0.614496
	0.131		0.615138
	0.132		0.615779
	0.132		0.616421
	0.132		0.617062
	0.132		0.617704
	0.132		0.618345
	0.133		0.618987
	0.133		0.619628
	0.133		0.620269
	0.133		0.620911
	0.133		0.621552
	0.133		0.622194
	0.133		0.622835
	0.134		0.623477
	0.134		0.624118
	0.134		0.624759
	0.134		0.625401
	0.134		0.626042
	0.134		0.626684
	0.135		0.627325
	0.135		0.627967
	0.135		0.628608
	0.135		0.62925
	0.135		0.629891
	0.135		0.630532
	0.135		0.631174
	0.135		0.631815
	0.136		0.632457
	0.136		0.633098
	0.136		0.63374
	0.136		0.634381
	0.136		0.635022
	0.136		0.635664
	0.136		0.636305
	0.136		0.636947
	0.137		0.637588
	0.137		0.63823
	0.137		0.638871
	0.137		0.639513
	0.137		0.640154
	0.137		0.640795
	0.137		0.641437
	0.138		0.642078
	0.138		0.64272
	0.138		0.643361
	0.138		0.644003
	0.138		0.644644
	0.138		0.645285
	0.138		0.645927
	0.138		0.646568
	0.138		0.64721
	0.139		0.647851
	0.139		0.648493
	0.139		0.649134
	0.139		0.649775
	0.139		0.650417
	0.14		0.651058
	0.14		0.6517
	0.14		0.652341
	0.14		0.652983
	0.14		0.653624
	0.14		0.654266
	0.141		0.654907
	0.141		0.655548
	0.141		0.65619
	0.141		0.656831
	0.141		0.657473
	0.142		0.658114
	0.142		0.658756
	0.142		0.659397
	0.142		0.660038
	0.143		0.66068
	0.143		0.661321
	0.143		0.661963
	0.143		0.662604
	0.143		0.663246
	0.143		0.663887
	0.143		0.664529
	0.143		0.66517
	0.144		0.665811
	0.144		0.666453
	0.144		0.667094
	0.144		0.667736
	0.144		0.668377
	0.144		0.669019
	0.144		0.66966
	0.145		0.670301
	0.145		0.670943
	0.145		0.671584
	0.145		0.672226
	0.145		0.672867
	0.145		0.673509
	0.145		0.67415
	0.145		0.674792
	0.145		0.675433
	0.145		0.676074
	0.145		0.676716
	0.145		0.677357
	0.146		0.677999
	0.146		0.67864
	0.146		0.679282
	0.146		0.679923
	0.146		0.680564
	0.146		0.681206
	0.146		0.681847
	0.146		0.682489
	0.147		0.68313
	0.147		0.683772
	0.147		0.684413
	0.147		0.685055
	0.147		0.685696
	0.147		0.686337
	0.147		0.686979
	0.147		0.68762
	0.147		0.688262
	0.147		0.688903
	0.147		0.689545
	0.147		0.690186
	0.148		0.690827
	0.148		0.691469
	0.148		0.69211
	0.148		0.692752
	0.148		0.693393
	0.148		0.694035
	0.148		0.694676
	0.148		0.695318
	0.148		0.695959
	0.148		0.6966
	0.148		0.697242
	0.148		0.697883
	0.149		0.698525
	0.149		0.699166
	0.149		0.699808
	0.149		0.700449
	0.149		0.70109
	0.149		0.701732
	0.149		0.702373
	0.149		0.703015
	0.149		0.703656
	0.15		0.704298
	0.15		0.704939
	0.15		0.705581
	0.15		0.706222
	0.15		0.706863
	0.15		0.707505
	0.15		0.708146
	0.15		0.708788
	0.15		0.709429
	0.15		0.710071
	0.151		0.710712
	0.151		0.711353
	0.151		0.711995
	0.151		0.712636
	0.151		0.713278
	0.151		0.713919
	0.152		0.714561
	0.152		0.715202
	0.152		0.715843
	0.152		0.716485
	0.152		0.717126
	0.153		0.717768
	0.153		0.718409
	0.153		0.719051
	0.154		0.719692
	0.154		0.720334
	0.154		0.720975
	0.154		0.721616
	0.155		0.722258
	0.155		0.722899
	0.155		0.723541
	0.155		0.724182
	0.155		0.724824
	0.155		0.725465
	0.155		0.726106
	0.155		0.726748
	0.155		0.727389
	0.155		0.728031
	0.155		0.728672
	0.155		0.729314
	0.155		0.729955
	0.155		0.730597
	0.156		0.731238
	0.156		0.731879
	0.156		0.732521
	0.157		0.733162
	0.157		0.733804
	0.157		0.734445
	0.157		0.735087
	0.157		0.735728
	0.157		0.736369
	0.157		0.737011
	0.158		0.737652
	0.158		0.738294
	0.158		0.738935
	0.158		0.739577
	0.158		0.740218
	0.158		0.74086
	0.158		0.741501
	0.158		0.742142
	0.158		0.742784
	0.158		0.743425
	0.158		0.744067
	0.158		0.744708
	0.159		0.74535
	0.159		0.745991
	0.159		0.746632
	0.16		0.747274
	0.16		0.747915
	0.16		0.748557
	0.16		0.749198
	0.16		0.74984
	0.16		0.750481
	0.16		0.751123
	0.161		0.751764
	0.161		0.752405
	0.161		0.753047
	0.161		0.753688
	0.161		0.75433
	0.161		0.754971
	0.162		0.755613
	0.162		0.756254
	0.162		0.756895
	0.162		0.757537
	0.162		0.758178
	0.162		0.75882
	0.162		0.759461
	0.163		0.760103
	0.163		0.760744
	0.164		0.761386
	0.164		0.762027
	0.164		0.762668
	0.164		0.76331
	0.164		0.763951
	0.165		0.764593
	0.165		0.765234
	0.165		0.765876
	0.165		0.766517
	0.165		0.767158
	0.165		0.7678
	0.165		0.768441
	0.166		0.769083
	0.166		0.769724
	0.166		0.770366
	0.166		0.771007
	0.166		0.771648
	0.167		0.77229
	0.167		0.772931
	0.167		0.773573
	0.167		0.774214
	0.167		0.774856
	0.167		0.775497
	0.167		0.776139
	0.167		0.77678
	0.168		0.777421
	0.168		0.778063
	0.168		0.778704
	0.168		0.779346
	0.169		0.779987
	0.169		0.780629
	0.169		0.78127
	0.17		0.781911
	0.17		0.782553
[truncated: 339 more rows]

## Sheet: d. # of mitochondria-cytosol
fed	0.211113	0.261253	0.69277	0.766451	0.441321	0.219982	0.45238	0.550126	0.43426	0.633965	0.739906	0.25856	0.283504	0.315737	0.258916	0.407273	0.269935	0.445331	0.10165	0.36539	0.537523	0.1945	0.21832	0.3553	0.52186	0.2983	0.33712	0.29449	0.41764	0.4055	0.52419	0.367236	0.474761	0.585389	0.350394	0.64638	0.68572	0.590347	0.423198	0.582986
fasted	0.583747	0.534925	0.282167	0.467085	0.797951	0.469161	0.545479	0.63999	0.400744	1.06128	0.639795	0.380445	0.40708	0.46807	0.375695	0.259188	0.761157	0.530201	0.503027	0.444165	0.491221	0.606428	0.806742	0.550877	0.488456	0.46191	0.639625	0.192332	1.16446	1.01973	0.65517	0.72002	0.7652	0.53762	0.376561	0.447788	0.523679	0.498521	0.488872	0.567163	0.357079	0.936658	0.644846	0.408052	0.113785	0.321073

## Sheet: e. Aspect Ratio
fed	1.4394	1.74757	1.67144	1.53814	1.28862	2.23	1.4858	1.69709	1.53739	1.73856	1.71741	2.00043	1.58925	1.64262	2.42588	1.81657	1.5732	1.8084	1.19867	1.7441	1.98335	2.8816	1.6865	1.63744	1.58471	1.60678	1.82582	2.14871	1.47513	1.88554	2.2806	1.58968	1.5785	1.74777	1.823	1.64615	1.75804	2.01944	2.03617	1.66042
fasted	1.75493	1.58168	1.62636	1.46711	1.68769	1.51079	1.55613	1.54515	1.4135	1.46171	1.59547	1.86268	1.74022	1.46265	1.64278	1.57384	1.3196	1.70833	1.73437	1.53338	1.50929	1.53575	1.66826	1.61471	1.535	1.59717	1.91004	1.85646	1.58831	1.806	1.78819	1.71398	1.50013	1.48608	1.61342	1.87638	1.31462	1.6702	1.74104	1.71636	1.80608	1.66274	1.769	1.69835	1.42997	1.68042	1.7005	1.619

## Sheet: e. Mitochondrial AR Proba.
		Fed	Fasted
	1.009	0.001284
	1.014	0.002567
	1.029	0.003851
	1.037	0.005135
	1.041	0.006418
	1.044	0.007702
	1.045	0.008986
	1.05	0.01027
	1.057	0.011553
	1.058	0.012837
	1.059	0.014121
	1.061	0.015404
	1.062	0.016688
	1.063	0.017972
	1.063	0.019255
	1.064	0.020539
	1.064	0.021823
	1.066	0.023107
	1.068	0.02439
	1.074	0.025674
	1.084	0.026958
	1.086	0.028241
	1.09	0.029525
	1.09	0.030809
	1.09	0.032092
	1.091	0.033376
	1.094	0.03466
	1.094	0.035944
	1.097	0.037227
	1.097	0.038511
	1.104	0.039795
	1.105	0.041078
	1.106	0.042362
	1.107	0.043646
	1.107	0.044929
	1.108	0.046213
	1.109	0.047497
	1.11	0.04878
	1.111	0.050064
	1.111	0.051348
	1.116	0.052632
	1.118	0.053915
	1.119	0.055199
	1.121	0.056483
	1.123	0.057766
	1.124	0.05905
	1.126	0.060334
	1.128	0.061617
	1.129	0.062901
	1.131	0.064185
	1.133	0.065469
	1.133	0.066752
	1.134	0.068036
	1.136	0.06932
	1.137	0.070603
	1.137	0.071887
	1.138	0.073171
	1.14	0.074454
	1.142	0.075738
	1.143	0.077022
	1.144	0.078306
	1.146	0.079589
	1.147	0.080873
	1.148	0.082157
	1.148	0.08344
	1.148	0.084724
	1.148	0.086008
	1.149	0.087291
	1.149	0.088575
	1.149	0.089859
	1.154	0.091142
	1.155	0.092426
	1.155	0.09371
	1.156	0.094994
	1.157	0.096277
	1.161	0.097561
	1.163	0.098845
	1.166	0.100128
	1.167	0.101412
	1.167	0.102696
	1.169	0.103979
	1.17	0.105263
	1.17	0.106547
	1.172	0.107831
	1.173	0.109114
	1.173	0.110398
	1.173	0.111682
	1.173	0.112965
	1.173	0.114249
	1.175	0.115533
	1.175	0.116816
	1.177	0.1181
	1.178	0.119384
	1.182	0.120668
	1.184	0.121951
	1.184	0.123235
	1.185	0.124519
	1.187	0.125802
	1.189	0.127086
	1.19	0.12837
	1.19	0.129653
	1.192	0.130937
	1.194	0.132221
	1.194	0.133504
	1.195	0.134788
	1.196	0.136072
	1.199	0.137356
	1.2	0.138639
	1.2	0.139923
	1.204	0.141207
	1.205	0.14249
	1.205	0.143774
	1.207	0.145058
	1.208	0.146341
	1.208	0.147625
	1.21	0.148909
	1.21	0.150193
	1.211	0.151476
	1.211	0.15276
	1.213	0.154044
	1.213	0.155327
	1.214	0.156611
	1.214	0.157895
	1.215	0.159178
	1.217	0.160462
	1.219	0.161746
	1.22	0.16303
	1.22	0.164313
	1.22	0.165597
	1.221	0.166881
	1.222	0.168164
	1.228	0.169448
	1.229	0.170732
	1.229	0.172015
	1.229	0.173299
	1.231	0.174583
	1.233	0.175866
	1.234	0.17715
	1.234	0.178434
	1.235	0.179718
	1.236	0.181001
	1.236	0.182285
	1.237	0.183569
	1.237	0.184852
	1.238	0.186136
	1.242	0.18742
	1.243	0.188703
	1.249	0.189987
	1.251	0.191271
	1.252	0.192555
	1.253	0.193838
	1.253	0.195122
	1.256	0.196406
	1.26	0.197689
	1.26	0.198973
	1.261	0.200257
	1.262	0.20154
	1.262	0.202824
	1.262	0.204108
	1.263	0.205392
	1.263	0.206675
	1.263	0.207959
	1.264	0.209243
	1.266	0.210526
	1.266	0.21181
	1.266	0.213094
	1.266	0.214377
	1.268	0.215661
	1.269	0.216945
	1.27	0.218228
	1.273	0.219512
	1.274	0.220796
	1.275	0.22208
	1.276	0.223363
	1.276	0.224647
	1.277	0.225931
	1.278	0.227214
	1.279	0.228498
	1.28	0.229782
	1.28	0.231065
	1.285	0.232349
	1.285	0.233633
	1.286	0.234917
	1.287	0.2362
	1.287	0.237484
	1.287	0.238768
	1.288	0.240051
	1.288	0.241335
	1.288	0.242619
	1.289	0.243902
	1.292	0.245186
	1.292	0.24647
	1.293	0.247754
	1.294	0.249037
	1.294	0.250321
	1.294	0.251605
	1.295	0.252888
	1.297	0.254172
	1.298	0.255456
	1.3	0.256739
	1.301	0.258023
	1.303	0.259307
	1.304	0.260591
	1.306	0.261874
	1.307	0.263158
	1.308	0.264442
	1.308	0.265725
	1.309	0.267009
	1.31	0.268293
	1.31	0.269576
	1.31	0.27086
	1.311	0.272144
	1.313	0.273427
	1.314	0.274711
	1.316	0.275995
	1.316	0.277279
	1.317	0.278562
	1.319	0.279846
	1.32	0.28113
	1.32	0.282413
	1.321	0.283697
	1.321	0.284981
	1.321	0.286264
	1.323	0.287548
	1.324	0.288832
	1.326	0.290116
	1.328	0.291399
	1.328	0.292683
	1.33	0.293967
	1.331	0.29525
	1.331	0.296534
	1.332	0.297818
	1.334	0.299101
	1.334	0.300385
	1.334	0.301669
	1.335	0.302953
	1.338	0.304236
	1.34	0.30552
	1.34	0.306804
	1.341	0.308087
	1.342	0.309371
	1.342	0.310655
	1.343	0.311938
	1.344	0.313222
	1.349	0.314506
	1.35	0.315789
	1.351	0.317073
	1.351	0.318357
	1.353	0.319641
	1.353	0.320924
	1.354	0.322208
	1.354	0.323492
	1.355	0.324775
	1.355	0.326059
	1.356	0.327343
	1.358	0.328626
	1.36	0.32991
	1.361	0.331194
	1.361	0.332478
	1.363	0.333761
	1.364	0.335045
	1.365	0.336329
	1.366	0.337612
	1.368	0.338896
	1.369	0.34018
	1.369	0.341463
	1.373	0.342747
	1.375	0.344031
	1.376	0.345315
	1.379	0.346598
	1.38	0.347882
	1.384	0.349166
	1.384	0.350449
	1.385	0.351733
	1.385	0.353017
	1.386	0.3543
	1.387	0.355584
	1.388	0.356868
	1.389	0.358151
	1.39	0.359435
	1.39	0.360719
	1.393	0.362003
	1.394	0.363286
	1.395	0.36457
	1.395	0.365854
	1.397	0.367137
	1.397	0.368421
	1.398	0.369705
	1.398	0.370988
	1.399	0.372272
	1.399	0.373556
	1.399	0.37484
	1.401	0.376123
	1.401	0.377407
	1.402	0.378691
	1.402	0.379974
	1.403	0.381258
	1.403	0.382542
	1.404	0.383825
	1.407	0.385109
	1.407	0.386393
	1.408	0.387677
	1.41	0.38896
	1.411	0.390244
	1.414	0.391528
	1.414	0.392811
	1.419	0.394095
	1.42	0.395379
	1.421	0.396662
	1.421	0.397946
	1.422	0.39923
	1.422	0.400513
	1.424	0.401797
	1.425	0.403081
	1.426	0.404365
	1.428	0.405648
	1.429	0.406932
	1.43	0.408216
	1.43	0.409499
	1.431	0.410783
	1.432	0.412067
	1.432	0.41335
	1.434	0.414634
	1.435	0.415918
	1.436	0.417202
	1.437	0.418485
	1.442	0.419769
	1.442	0.421053
	1.443	0.422336
	1.445	0.42362
	1.446	0.424904
	1.446	0.426187
	1.446	0.427471
	1.448	0.428755
	1.45	0.430039
	1.451	0.431322
	1.451	0.432606
	1.452	0.43389
	1.454	0.435173
	1.455	0.436457
	1.456	0.437741
	1.457	0.439024
	1.457	0.440308
	1.458	0.441592
	1.458	0.442875
	1.459	0.444159
	1.459	0.445443
	1.46	0.446727
	1.46	0.44801
	1.461	0.449294
	1.466	0.450578
	1.466	0.451861
	1.467	0.453145
	1.467	0.454429
	1.471	0.455712
	1.471	0.456996
	1.472	0.45828
	1.473	0.459564
	1.476	0.460847
	1.476	0.462131
	1.477	0.463415
	1.477	0.464698
	1.478	0.465982
	1.478	0.467266
	1.479	0.468549
	1.479	0.469833
	1.479	0.471117
	1.479	0.472401
	1.48	0.473684
	1.48	0.474968
	1.482	0.476252
	1.482	0.477535
	1.483	0.478819
	1.483	0.480103
	1.483	0.481386
	1.484	0.48267
	1.484	0.483954
	1.486	0.485237
	1.487	0.486521
	1.487	0.487805
	1.487	0.489089
	1.488	0.490372
	1.49	0.491656
	1.492	0.49294
	1.492	0.494223
	1.493	0.495507
	1.493	0.496791
	1.495	0.498074
	1.496	0.499358
	1.499	0.500642
	1.499	0.501926
	1.499	0.503209
	1.501	0.504493
	1.502	0.505777
	1.505	0.50706
	1.506	0.508344
	1.507	0.509628
	1.51	0.510911
	1.51	0.512195
	1.511	0.513479
	1.515	0.514763
	1.517	0.516046
	1.518	0.51733
	1.518	0.518614
	1.518	0.519897
	1.52	0.521181
	1.52	0.522465
	1.523	0.523748
	1.524	0.525032
	1.524	0.526316
	1.525	0.527599
	1.528	0.528883
	1.529	0.530167
	1.53	0.531451
	1.531	0.532734
	1.531	0.534018
	1.534	0.535302
	1.536	0.536585
	1.539	0.537869
	1.54	0.539153
	1.541	0.540436
	1.542	0.54172
	1.543	0.543004
	1.547	0.544288
	1.548	0.545571
	1.548	0.546855
	1.548	0.548139
	1.549	0.549422
	1.549	0.550706
	1.55	0.55199
	1.552	0.553273
	1.552	0.554557
	1.555	0.555841
	1.558	0.557125
	1.56	0.558408
	1.56	0.559692
	1.561	0.560976
	1.563	0.562259
	1.564	0.563543
	1.566	0.564827
	1.568	0.56611
	1.57	0.567394
	1.57	0.568678
	1.571	0.569961
	1.572	0.571245
	1.573	0.572529
	1.574	0.573813
	1.575	0.575096
	1.58	0.57638
	1.581	0.577664
	1.581	0.578947
	1.582	0.580231
	1.582	0.581515
	1.583	0.582798
	1.583	0.584082
	1.585	0.585366
	1.585	0.58665
	1.587	0.587933
	1.588	0.589217
	1.592	0.590501
	1.594	0.591784
	1.595	0.593068
	1.596	0.594352
	1.596	0.595635
	1.596	0.596919
	1.599	0.598203
	1.607	0.599487
	1.61	0.60077
	1.618	0.602054
	1.62	0.603338
	1.631	0.604621
	1.633	0.605905
	1.637	0.607189
	1.639	0.608472
	1.647	0.609756
	1.65	0.61104
	1.65	0.612323
	1.651	0.613607
	1.651	0.614891
	1.658	0.616175
	1.66	0.617458
	1.66	0.618742
	1.663	0.620026
	1.665	0.621309
	1.666	0.622593
	1.67	0.623877
	1.67	0.62516
	1.672	0.626444
	1.674	0.627728
	1.679	0.629012
	1.685	0.630295
	1.694	0.631579
	1.695	0.632863
	1.698	0.634146
	1.698	0.63543
	1.704	0.636714
	1.704	0.637997
	1.705	0.639281
	1.708	0.640565
	1.719	0.641849
	1.723	0.643132
	1.726	0.644416
	1.73	0.6457
	1.736	0.646983
	1.736	0.648267
	1.739	0.649551
	1.74	0.650834
	1.744	0.652118
	1.75	0.653402
	1.751	0.654685
	1.751	0.655969
	1.754	0.657253
	1.756	0.658537
	1.757	0.65982
	1.758	0.661104
	1.758	0.662388
	1.76	0.663671
	1.76	0.664955
	1.76	0.666239
	1.764	0.667522
	1.767	0.668806
	1.767	0.67009
	1.767	0.671374
	1.767	0.672657
	1.772	0.673941
	1.776	0.675225
	1.778	0.676508
	1.779	0.677792
	1.779	0.679076
	1.779	0.680359
	1.78	0.681643
	1.781	0.682927
	1.781	0.684211
	1.789	0.685494
	1.789	0.686778
	1.79	0.688062
	1.794	0.689345
	1.795	0.690629
	1.795	0.691913
	1.806	0.693196
	1.808	0.69448
	1.811	0.695764
	1.812	0.697047
	1.817	0.698331
	1.822	0.699615
	1.828	0.700899
	1.831	0.702182
	1.833	0.703466
	1.833	0.70475
	1.833	0.706033
	1.834	0.707317
	1.841	0.708601
	1.849	0.709884
	1.851	0.711168
	1.851	0.712452
	1.854	0.713736
	1.856	0.715019
	1.857	0.716303
	1.858	0.717587
	1.863	0.71887
	1.865	0.720154
	1.867	0.721438
	1.871	0.722721
	1.876	0.724005
	1.876	0.725289
	1.884	0.726573
	1.89	0.727856
	1.895	0.72914
	1.896	0.730424
	1.9	0.731707
	1.909	0.732991
	1.919	0.734275
	1.921	0.735558
	1.922	0.736842
	1.929	0.738126
	1.93	0.739409
	1.939	0.740693
	1.943	0.741977
	1.95	0.743261
	1.954	0.744544
	1.955	0.745828
	1.957	0.747112
	1.957	0.748395
	1.957	0.749679
	1.957	0.750963
	1.957	0.752246
	1.958	0.75353
	1.959	0.754814
	1.96	0.756098
	1.964	0.757381
	1.965	0.758665
	1.968	0.759949
	1.969	0.761232
	1.97	0.762516
	1.975	0.7638
	1.98	0.765083
	1.982	0.766367
	1.986	0.767651
	1.994	0.768935
	2.001	0.770218
	2.002	0.771502
	2.007	0.772786
	2.008	0.774069
	2.01	0.775353
	2.011	0.776637
	2.015	0.77792
	2.016	0.779204
	2.017	0.780488
	2.025	0.781772
	2.026	0.783055
	2.027	0.784339
	2.038	0.785623
	2.039	0.786906
	2.053	0.78819
	2.062	0.789474
	2.065	0.790757
	2.076	0.792041
	2.085	0.793325
	2.094	0.794608
	2.095	0.795892
	2.099	0.797176
	2.101	0.79846
	2.102	0.799743
	2.109	0.801027
	2.11	0.802311
	2.111	0.803594
	2.112	0.804878
	2.115	0.806162
	2.117	0.807445
	2.118	0.808729
	2.122	0.810013
	2.123	0.811297
	2.131	0.81258
	2.135	0.813864
	2.14	0.815148
	2.141	0.816431
	2.16	0.817715
	2.17	0.818999
	2.179	0.820282
	2.187	0.821566
	2.191	0.82285
	2.193	0.824134
	2.194	0.825417
	2.197	0.826701
	2.213	0.827985
	2.218	0.829268
	2.227	0.830552
	2.24	0.831836
	2.242	0.833119
	2.242	0.834403
	2.246	0.835687
	2.249	0.83697
	2.252	0.838254
	2.264	0.839538
	2.279	0.840822
	2.285	0.842105
	2.293	0.843389
	2.299	0.844673
	2.3	0.845956
	2.306	0.84724
	2.313	0.848524
	2.327	0.849807
	2.331	0.851091
	2.348	0.852375
	2.353	0.853659
	2.386	0.854942
	2.389	0.856226
	2.399	0.85751
	2.405	0.858793
	2.406	0.860077
	2.417	0.861361
	2.422	0.862644
	2.427	0.863928
	2.435	0.865212
	2.443	0.866496
	2.45	0.867779
	2.451	0.869063
	2.459	0.870347
	2.465	0.87163
	2.471	0.872914
	2.473	0.874198
	2.485	0.875481
	2.487	0.876765
	2.489	0.878049
	2.502	0.879332
	2.506	0.880616
	2.511	0.8819
	2.527	0.883184
	2.535	0.884467
	2.537	0.885751
	2.543	0.887035
	2.558	0.888318
	2.57	0.889602
	2.576	0.890886
	2.586	0.892169
	2.593	0.893453
	2.596	0.894737
	2.603	0.896021
	2.604	0.897304
	2.606	0.898588
	2.607	0.899872
	2.613	0.901155
	2.621	0.902439
	2.636	0.903723
	2.642	0.905006
	2.668	0.90629
	2.685	0.907574
	2.69	0.908858
	2.7	0.910141
	2.7	0.911425
	2.766	0.912709
	2.801	0.913992
	2.81	0.915276
	2.858	0.91656
	2.87	0.917843
	2.871	0.919127
	2.891	0.920411
	2.893	0.921694
	2.893	0.922978
	2.893	0.924262
	2.901	0.925546
	2.926	0.926829
	2.927	0.928113
	2.932	0.929397
	2.94	0.93068
	2.965	0.931964
	2.998	0.933248
	3.018	0.934531
	3.03	0.935815
	3.091	0.937099
	3.092	0.938383
	3.097	0.939666
	3.101	0.94095
	3.123	0.942234
	3.131	0.943517
	3.152	0.944801
	3.157	0.946085
	3.207	0.947368
	3.217	0.948652
	3.232	0.949936
	3.286	0.95122
	3.347	0.952503
	3.378	0.953787
	3.38	0.955071
	3.405	0.956354
	3.412	0.957638
	3.489	0.958922
	3.509	0.960205
	3.51	0.961489
	3.511	0.962773
	3.516	0.964056
	3.564	0.96534
	3.579	0.966624
	3.59	0.967908
	3.608	0.969191
	3.608	0.970475
	3.626	0.971759
	3.709	0.973042
	3.732	0.974326
	3.752	0.97561
	3.797	0.976893
	3.811	0.978177
	3.821	0.979461
	3.841	0.980745
	3.924	0.982028
	3.924	0.983312
	3.958	0.984596
	4.053	0.985879
	4.301	0.987163
	4.302	0.988447
	4.304	0.98973
	4.489	0.991014
	4.766	0.992298
	4.798	0.993582
	4.888	0.994865
	5.053	0.996149
	5.37	0.997433
	6.055	0.998716
	6.102	1
	1.014		0.000641
	1.019		0.001283
	1.02		0.001924
	1.025		0.002566
	1.03		0.003207
	1.031		0.003849
	1.031		0.00449
	1.032		0.005131
	1.034		0.005773
	1.039		0.006414
	1.04		0.007056
	1.042		0.007697
	1.043		0.008339
	1.044		0.00898
	1.045		0.009622
	1.046		0.010263
	1.05		0.010904
	1.053		0.011546
	1.055		0.012187
	1.055		0.012829
	1.056		0.01347
	1.056		0.014112
	1.056		0.014753
	1.058		0.015394
	1.058		0.016036
	1.058		0.016677
	1.058		0.017319
	1.059		0.01796
	1.063		0.018602
	1.065		0.019243
	1.065		0.019885
	1.067		0.020526
	1.067		0.021167
	1.068		0.021809
	1.069		0.02245
	1.07		0.023092
	1.07		0.023733
	1.072		0.024375
	1.073		0.025016
	1.073		0.025657
	1.073		0.026299
	1.074		0.02694
	1.075		0.027582
	1.077		0.028223
	1.078		0.028865
	1.078		0.029506
	1.08		0.030148
	1.08		0.030789
	1.08		0.03143
	1.08		0.032072
	1.082		0.032713
	1.084		0.033355
	1.084		0.033996
	1.084		0.034638
	1.084		0.035279
	1.089		0.03592
	1.09		0.036562
	1.09		0.037203
	1.09		0.037845
	1.091		0.038486
	1.091		0.039128
	1.093		0.039769
	1.094		0.040411
	1.095		0.041052
	1.096		0.041693
	1.1		0.042335
	1.1		0.042976
	1.1		0.043618
	1.1		0.044259
	1.1		0.044901
	1.1		0.045542
	1.104		0.046183
	1.104		0.046825
	1.104		0.047466
	1.106		0.048108
	1.106		0.048749
	1.107		0.049391
	1.109		0.050032
	1.11		0.050674
	1.11		0.051315
	1.11		0.051956
	1.111		0.052598
	1.112		0.053239
	1.113		0.053881
	1.113		0.054522
	1.113		0.055164
	1.115		0.055805
	1.115		0.056446
	1.116		0.057088
	1.116		0.057729
	1.117		0.058371
	1.117		0.059012
	1.118		0.059654
	1.118		0.060295
	1.118		0.060936
	1.118		0.061578
	1.119		0.062219
	1.119		0.062861
	1.119		0.063502
	1.12		0.064144
	1.12		0.064785
	1.12		0.065427
	1.12		0.066068
	1.121		0.066709
	1.122		0.067351
	1.122		0.067992
	1.122		0.068634
	1.124		0.069275
	1.125		0.069917
	1.126		0.070558
	1.126		0.071199
	1.126		0.071841
	1.127		0.072482
	1.129		0.073124
	1.129		0.073765
	1.13		0.074407
	1.13		0.075048
	1.13		0.07569
	1.13		0.076331
	1.131		0.076972
	1.131		0.077614
	1.131		0.078255
	1.132		0.078897
	1.132		0.079538
	1.132		0.08018
	1.132		0.080821
	1.133		0.081462
	1.133		0.082104
	1.134		0.082745
	1.134		0.083387
	1.137		0.084028
	1.138		0.08467
	1.138		0.085311
	1.138		0.085953
	1.14		0.086594
	1.14		0.087235
	1.141		0.087877
	1.142		0.088518
	1.143		0.08916
	1.143		0.089801
	1.144		0.090443
	1.144		0.091084
	1.146		0.091725
	1.147		0.092367
	1.147		0.093008
	1.148		0.09365
	1.148		0.094291
	1.149		0.094933
	1.15		0.095574
	1.15		0.096216
	1.15		0.096857
	1.151		0.097498
	1.151		0.09814
	1.152		0.098781
	1.152		0.099423
	1.153		0.100064
	1.153		0.100706
	1.153		0.101347
	1.154		0.101988
	1.155		0.10263
	1.155		0.103271
	1.155		0.103913
	1.156		0.104554
	1.156		0.105196
	1.156		0.105837
	1.157		0.106479
	1.157		0.10712
	1.157		0.107761
	1.158		0.108403
	1.159		0.109044
	1.159		0.109686
	1.159		0.110327
	1.159		0.110969
	1.161		0.11161
	1.162		0.112251
	1.162		0.112893
	1.163		0.113534
	1.164		0.114176
	1.164		0.114817
	1.164		0.115459
	1.164		0.1161
	1.166		0.116742
	1.166		0.117383
	1.167		0.118024
	1.167		0.118666
	1.168		0.119307
	1.168		0.119949
	1.168		0.12059
	1.168		0.121232
	1.169		0.121873
	1.17		0.122514
	1.17		0.123156
	1.17		0.123797
	1.171		0.124439
	1.171		0.12508
	1.172		0.125722
	1.173		0.126363
	1.173		0.127004
	1.173		0.127646
	1.173		0.128287
	1.173		0.128929
	1.173		0.12957
	1.174		0.130212
	1.174		0.130853
	1.174		0.131495
	1.175		0.132136
	1.175		0.132777
	1.175		0.133419
	1.176		0.13406
	1.176		0.134702
	1.177		0.135343
	1.178		0.135985
	1.178		0.136626
	1.178		0.137267
	1.178		0.137909
	1.18		0.13855
	1.18		0.139192
	1.18		0.139833
	1.18		0.140475
	1.181		0.141116
	1.182		0.141758
	1.182		0.142399
	1.183		0.14304
	1.183		0.143682
	1.183		0.144323
	1.183		0.144965
	1.184		0.145606
	1.184		0.146248
	1.184		0.146889
	1.184		0.14753
	1.185		0.148172
	1.185		0.148813
	1.185		0.149455
	1.185		0.150096
	1.185		0.150738
	1.186		0.151379
	1.186		0.152021
	1.188		0.152662
	1.188		0.153303
	1.188		0.153945
	1.188		0.154586
	1.188		0.155228
	1.189		0.155869
	1.19		0.156511
	1.19		0.157152
	1.19		0.157793
	1.191		0.158435
	1.191		0.159076
	1.194		0.159718
	1.194		0.160359
	1.194		0.161001
	1.195		0.161642
	1.197		0.162284
	1.197		0.162925
	1.197		0.163566
	1.197		0.164208
	1.198		0.164849
	1.198		0.165491
	1.199		0.166132
	1.199		0.166774
	1.199		0.167415
	1.199		0.168056
	1.201		0.168698
	1.201		0.169339
	1.202		0.169981
	1.202		0.170622
	1.203		0.171264
	1.203		0.171905
	1.203		0.172547
	1.203		0.173188
	1.204		0.173829
	1.204		0.174471
	1.204		0.175112
	1.205		0.175754
	1.205		0.176395
	1.206		0.177037
	1.206		0.177678
	1.206		0.178319
	1.208		0.178961
	1.208		0.179602
	1.209		0.180244
	1.209		0.180885
	1.209		0.181527
	1.21		0.182168
	1.21		0.182809
	1.212		0.183451
	1.212		0.184092
	1.212		0.184734
	1.212		0.185375
	1.212		0.186017
	1.212		0.186658
	1.213		0.1873
	1.213		0.187941
	1.213		0.188582
	1.213		0.189224
	1.214		0.189865
	1.215		0.190507
	1.215		0.191148
	1.215		0.19179
	1.215		0.192431
	1.215		0.193072
	1.215		0.193714
	1.218		0.194355
	1.22		0.194997
	1.22		0.195638
	1.22		0.19628
	1.22		0.196921
	1.22		0.197563
	1.221		0.198204
	1.221		0.198845
	1.221		0.199487
	1.221		0.200128
	1.222		0.20077
	1.223		0.201411
	1.223		0.202053
	1.223		0.202694
	1.224		0.203335
	1.224		0.203977
	1.225		0.204618
	1.225		0.20526
	1.225		0.205901
	1.226		0.206543
	1.228		0.207184
	1.228		0.207826
	1.228		0.208467
	1.228		0.209108
	1.228		0.20975
	1.228		0.210391
	1.228		0.211033
	1.228		0.211674
	1.229		0.212316
	1.229		0.212957
	1.23		0.213598
	1.23		0.21424
	1.23		0.214881
	1.231		0.215523
	1.232		0.216164
	1.233		0.216806
	1.234		0.217447
	1.234		0.218089
	1.234		0.21873
	1.234		0.219371
	1.234		0.220013
	1.234		0.220654
	1.235		0.221296
	1.235		0.221937
	1.236		0.222579
	1.236		0.22322
	1.236		0.223861
	1.237		0.224503
	1.237		0.225144
	1.237		0.225786
	1.238		0.226427
	1.239		0.227069
	1.24		0.22771
	1.241		0.228352
	1.241		0.228993
	1.241		0.229634
	1.242		0.230276
	1.242		0.230917
	1.242		0.231559
	1.243		0.2322
	1.243		0.232842
	1.245		0.233483
	1.245		0.234124
	1.245		0.234766
	1.245		0.235407
	1.246		0.236049
	1.246		0.23669
	1.248		0.237332
	1.249		0.237973
	1.249		0.238614
	1.25		0.239256
	1.25		0.239897
	1.25		0.240539
	1.251		0.24118
	1.253		0.241822
	1.253		0.242463
	1.254		0.243105
	1.254		0.243746
	1.254		0.244387
	1.255		0.245029
	1.255		0.24567
	1.256		0.246312
	1.256		0.246953
	1.256		0.247595
	1.256		0.248236
	1.257		0.248877
	1.259		0.249519
	1.259		0.25016
	1.259		0.250802
	1.26		0.251443
	1.26		0.252085
	1.26		0.252726
	1.26		0.253368
	1.261		0.254009
	1.261		0.25465
	1.261		0.255292
	1.262		0.255933
	1.262		0.256575
	1.264		0.257216
	1.264		0.257858
	1.264		0.258499
	1.264		0.25914
	1.265		0.259782
	1.265		0.260423
	1.266		0.261065
	1.266		0.261706
	1.266		0.262348
	1.266		0.262989
	1.267		0.263631
	1.268		0.264272
	1.269		0.264913
	1.269		0.265555
	1.269		0.266196
	1.27		0.266838
	1.27		0.267479
	1.271		0.268121
	1.272		0.268762
	1.272		0.269403
	1.273		0.270045
	1.273		0.270686
	1.273		0.271328
	1.274		0.271969
	1.274		0.272611
	1.275		0.273252
	1.276		0.273894
	1.276		0.274535
	1.278		0.275176
	1.279		0.275818
	1.28		0.276459
	1.28		0.277101
	1.281		0.277742
	1.281		0.278384
	1.281		0.279025
	1.281		0.279666
	1.281		0.280308
	1.282		0.280949
	1.282		0.281591
	1.282		0.282232
	1.282		0.282874
	1.283		0.283515
	1.284		0.284157
	1.284		0.284798
	1.285		0.285439
	1.285		0.286081
	1.285		0.286722
	1.285		0.287364
	1.285		0.288005
	1.286		0.288647
	1.286		0.289288
	1.286		0.289929
	1.286		0.290571
	1.286		0.291212
	1.287		0.291854
	1.288		0.292495
	1.288		0.293137
	1.289		0.293778
	1.289		0.294419
	1.289		0.295061
	1.289		0.295702
	1.289		0.296344
	1.289		0.296985
	1.289		0.297627
	1.289		0.298268
	1.289		0.29891
	1.29		0.299551
	1.29		0.300192
	1.29		0.300834
	1.29		0.301475
	1.291		0.302117
	1.292		0.302758
	1.292		0.3034
	1.292		0.304041
	1.293		0.304682
	1.294		0.305324
	1.294		0.305965
	1.294		0.306607
	1.294		0.307248
	1.294		0.30789
	1.295		0.308531
	1.295		0.309173
	1.297		0.309814
	1.298		0.310455
	1.298		0.311097
	1.298		0.311738
	1.298		0.31238
	1.299		0.313021
	1.299		0.313663
	1.299		0.314304
	1.299		0.314945
	1.299		0.315587
	1.299		0.316228
	1.3		0.31687
	1.3		0.317511
	1.3		0.318153
	1.301		0.318794
	1.304		0.319436
	1.304		0.320077
	1.305		0.320718
	1.306		0.32136
	1.306		0.322001
	1.306		0.322643
	1.306		0.323284
	1.307		0.323926
	1.308		0.324567
	1.308		0.325208
	1.309		0.32585
	1.309		0.326491
	1.31		0.327133
	1.31		0.327774
	1.311		0.328416
	1.311		0.329057
	1.311		0.329699
	1.312		0.33034
	1.312		0.330981
	1.314		0.331623
	1.314		0.332264
	1.316		0.332906
	1.316		0.333547
	1.316		0.334189
	1.316		0.33483
	1.316		0.335471
	1.318		0.336113
	1.318		0.336754
	1.318		0.337396
	1.319		0.338037
	1.319		0.338679
	1.319		0.33932
	1.319		0.339962
	1.319		0.340603
	1.32		0.341244
	1.32		0.341886
	1.32		0.342527
	1.32		0.343169
	1.32		0.34381
	1.321		0.344452
	1.321		0.345093
	1.321		0.345734
	1.322		0.346376
	1.322		0.347017
	1.322		0.347659
	1.322		0.3483
	1.323		0.348942
	1.323		0.349583
	1.323		0.350225
	1.323		0.350866
	1.323		0.351507
	1.324		0.352149
	1.324		0.35279
	1.324		0.353432
	1.324		0.354073
	1.324		0.354715
	1.324		0.355356
	1.324		0.355997
	1.325		0.356639
	1.325		0.35728
	1.325		0.357922
	1.325		0.358563
	1.326		0.359205
	1.327		0.359846
	1.329		0.360487
	1.33		0.361129
	1.33		0.36177
	1.33		0.362412
	1.331		0.363053
	1.331		0.363695
	1.332		0.364336
	1.333		0.364978
	1.333		0.365619
	1.333		0.36626
	1.334		0.366902
	1.334		0.367543
	1.334		0.368185
	1.334		0.368826
	1.335		0.369468
	1.335		0.370109
	1.335		0.37075
	1.335		0.371392
	1.335		0.372033
	1.336		0.372675
	1.337		0.373316
	1.338		0.373958
	1.338		0.374599
	1.338		0.375241
	1.338		0.375882
	1.339		0.376523
	1.339		0.377165
	1.339		0.377806
	1.341		0.378448
	1.341		0.379089
	1.342		0.379731
	1.342		0.380372
	1.342		0.381013
	1.343		0.381655
	1.343		0.382296
	1.343		0.382938
	1.344		0.383579
	1.344		0.384221
	1.345		0.384862
	1.345		0.385504
	1.345		0.386145
	1.345		0.386786
	1.345		0.387428
	1.345		0.388069
	1.346		0.388711
	1.346		0.389352
	1.346		0.389994
	1.347		0.390635
	1.347		0.391276
	1.348		0.391918
	1.348		0.392559
	1.348		0.393201
	1.349		0.393842
	1.349		0.394484
	1.349		0.395125
	1.35		0.395767
	1.351		0.396408
	1.352		0.397049
	1.352		0.397691
	1.352		0.398332
	1.352		0.398974
	1.353		0.399615
	1.354		0.400257
	1.355		0.400898
	1.355		0.401539
	1.355		0.402181
	1.355		0.402822
	1.356		0.403464
	1.356		0.404105
	1.356		0.404747
	1.356		0.405388
	1.357		0.40603
	1.357		0.406671
	1.359		0.407312
	1.36		0.407954
	1.36		0.408595
	1.36		0.409237
	1.361		0.409878
	1.362		0.41052
	1.363		0.411161
	1.363		0.411802
	1.363		0.412444
	1.363		0.413085
	1.363		0.413727
	1.364		0.414368
	1.364		0.41501
	1.364		0.415651
	1.365		0.416292
	1.365		0.416934
	1.365		0.417575
	1.366		0.418217
	1.366		0.418858
	1.366		0.4195
	1.366		0.420141
	1.366		0.420783
	1.367		0.421424
	1.368		0.422065
	1.368		0.422707
	1.368		0.423348
	1.369		0.42399
	1.369		0.424631
	1.369		0.425273
	1.369		0.425914
	1.37		0.426555
	1.37		0.427197
	1.371		0.427838
	1.371		0.42848
	1.371		0.429121
	1.373		0.429763
	1.373		0.430404
	1.373		0.431046
	1.373		0.431687
	1.373		0.432328
	1.374		0.43297
	1.375		0.433611
	1.375		0.434253
	1.376		0.434894
	1.377		0.435536
	1.377		0.436177
	1.378		0.436818
	1.378		0.43746
	1.378		0.438101
	1.379		0.438743
	1.38		0.439384
	1.38		0.440026
	1.38		0.440667
	1.38		0.441309
	1.38		0.44195
	1.381		0.442591
	1.381		0.443233
	1.381		0.443874
	1.383		0.444516
	1.384		0.445157
	1.384		0.445799
	1.384		0.44644
	1.384		0.447081
	1.384		0.447723
	1.384		0.448364
	1.385		0.449006
	1.385		0.449647
	1.387		0.450289
	1.388		0.45093
	1.388		0.451572
	1.388		0.452213
	1.388		0.452854
	1.39		0.453496
	1.391		0.454137
	1.392		0.454779
	1.392		0.45542
	1.393		0.456062
	1.393		0.456703
	1.393		0.457344
	1.393		0.457986
	1.394		0.458627
	1.395		0.459269
	1.396		0.45991
	1.397		0.460552
	1.398		0.461193
	1.398		0.461835
	1.398		0.462476
	1.398		0.463117
	1.399		0.463759
	1.399		0.4644
	1.4		0.465042
	1.401		0.465683
	1.402		0.466325
	1.402		0.466966
	1.403		0.467607
	1.405		0.468249
	1.405		0.46889
	1.406		0.469532
	1.408		0.470173
	1.409		0.470815
	1.409		0.471456
	1.41		0.472097
	1.41		0.472739
	1.41		0.47338
	1.41		0.474022
	1.412		0.474663
	1.412		0.475305
	1.412		0.475946
	1.414		0.476588
	1.414		0.477229
	1.414		0.47787
	1.414		0.478512
	1.414		0.479153
	1.415		0.479795
	1.415		0.480436
	1.415		0.481078
	1.415		0.481719
	1.415		0.48236
	1.416		0.483002
	1.416		0.483643
	1.416		0.484285
	1.417		0.484926
	1.417		0.485568
	1.417		0.486209
	1.417		0.486851
	1.418		0.487492
	1.419		0.488133
	1.42		0.488775
	1.42		0.489416
	1.42		0.490058
	1.421		0.490699
	1.421		0.491341
	1.421		0.491982
	1.422		0.492623
	1.422		0.493265
	1.423		0.493906
	1.426		0.494548
	1.426		0.495189
	1.427		0.495831
	1.427		0.496472
	1.427		0.497114
	1.427		0.497755
	1.428		0.498396
	1.428		0.499038
	1.428		0.499679
	1.429		0.500321
	1.429		0.500962
	1.43		0.501604
	1.43		0.502245
	1.432		0.502886
	1.434		0.503528
	1.434		0.504169
	1.434		0.504811
	1.434		0.505452
	1.435		0.506094
	1.435		0.506735
	1.436		0.507377
	1.437		0.508018
	1.438		0.508659
	1.438		0.509301
	1.44		0.509942
	1.442		0.510584
	1.443		0.511225
	1.443		0.511867
	1.444		0.512508
	1.445		0.513149
	1.446		0.513791
	1.446		0.514432
	1.446		0.515074
	1.447		0.515715
	1.448		0.516357
	1.448		0.516998
	1.449		0.51764
	1.449		0.518281
	1.45		0.518922
	1.45		0.519564
	1.453		0.520205
	1.454		0.520847
	1.455		0.521488
	1.455		0.52213
	1.455		0.522771
	1.456		0.523412
	1.456		0.524054
	1.456		0.524695
	1.456		0.525337
	1.456		0.525978
	1.456		0.52662
	1.456		0.527261
	1.456		0.527903
	1.457		0.528544
	1.458		0.529185
	1.459		0.529827
	1.459		0.530468
	1.461		0.53111
	1.462		0.531751
	1.463		0.532393
	1.464		0.533034
	1.464		0.533675
	1.464		0.534317
	1.465		0.534958
	1.466		0.5356
	1.468		0.536241
	1.468		0.536883
	1.468		0.537524
	1.468		0.538165
	1.471		0.538807
	1.471		0.539448
	1.471		0.54009
	1.471		0.540731
	1.472		0.541373
	1.473		0.542014
	1.474		0.542656
	1.475		0.543297
	1.476		0.543938
	1.476		0.54458
	1.476		0.545221
	1.477		0.545863
	1.477		0.546504
	1.477		0.547146
	1.477		0.547787
	1.478		0.548428
	1.478		0.54907
	1.478		0.549711
	1.478		0.550353
	1.479		0.550994
	1.479		0.551636
	1.479		0.552277
	1.479		0.552919
	1.481		0.55356
	1.481		0.554201
	1.482		0.554843
	1.482		0.555484
	1.482		0.556126
	1.482		0.556767
	1.482		0.557409
	1.483		0.55805
	1.483		0.558691
	1.484		0.559333
	1.485		0.559974
	1.485		0.560616
	1.485		0.561257
	1.486		0.561899
	1.486		0.56254
	1.486		0.563182
	1.487		0.563823
	1.487		0.564464
	1.488		0.565106
	1.488		0.565747
	1.489		0.566389
	1.49		0.56703
	1.492		0.567672
	1.492		0.568313
	1.492		0.568954
	1.495		0.569596
	1.495		0.570237
	1.496		0.570879
	1.498		0.57152
	1.501		0.572162
	1.501		0.572803
	1.501		0.573445
	1.502		0.574086
	1.502		0.574727
	1.502		0.575369
	1.504		0.57601
	1.504		0.576652
	1.505		0.577293
	1.506		0.577935
	1.506		0.578576
	1.506		0.579217
	1.507		0.579859
	1.509		0.5805
	1.509		0.581142
	1.509		0.581783
	1.509		0.582425
	1.51		0.583066
	1.51		0.583708
	1.511		0.584349
	1.511		0.58499
	1.512		0.585632
	1.512		0.586273
	1.513		0.586915
	1.513		0.587556
	1.515		0.588198
	1.515		0.588839
	1.516		0.58948
	1.516		0.590122
	1.517		0.590763
	1.517		0.591405
	1.517		0.592046
	1.517		0.592688
	1.517		0.593329
	1.517		0.59397
	1.519		0.594612
	1.522		0.595253
	1.522		0.595895
	1.522		0.596536
	1.523		0.597178
	1.524		0.597819
	1.524		0.598461
	1.524		0.599102
	1.525		0.599743
	1.526		0.600385
	1.529		0.601026
	1.53		0.601668
	1.531		0.602309
	1.531		0.602951
	1.532		0.603592
	1.533		0.604233
	1.535		0.604875
	1.535		0.605516
	1.535		0.606158
	1.535		0.606799
	1.536		0.607441
	1.536		0.608082
	1.537		0.608724
	1.538		0.609365
	1.538		0.610006
	1.538		0.610648
	1.539		0.611289
	1.54		0.611931
	1.54		0.612572
	1.542		0.613214
	1.542		0.613855
	1.543		0.614496
	1.544		0.615138
	1.544		0.615779
	1.545		0.616421
	1.546		0.617062
	1.547		0.617704
	1.547		0.618345
	1.548		0.618987
	1.548		0.619628
	1.549		0.620269
	1.55		0.620911
	1.55		0.621552
	1.55		0.622194
	1.551		0.622835
	1.551		0.623477
	1.551		0.624118
	1.552		0.624759
	1.552		0.625401
	1.553		0.626042
	1.553		0.626684
	1.554		0.627325
	1.554		0.627967
	1.554		0.628608
	1.555		0.62925
	1.555		0.629891
	1.555		0.630532
	1.556		0.631174
	1.557		0.631815
	1.557		0.632457
	1.557		0.633098
	1.558		0.63374
	1.558		0.634381
	1.558		0.635022
	1.558		0.635664
	1.559		0.636305
	1.56		0.636947
	1.56		0.637588
	1.561		0.63823
	1.561		0.638871
	1.562		0.639513
	1.562		0.640154
	1.562		0.640795
	1.566		0.641437
	1.566		0.642078
	1.567		0.64272
	1.568		0.643361
	1.568		0.644003
	1.569		0.644644
	1.57		0.645285
	1.57		0.645927
	1.572		0.646568
	1.573		0.64721
	1.575		0.647851
	1.575		0.648493
	1.576		0.649134
	1.576		0.649775
	1.576		0.650417
	1.577		0.651058
	1.579		0.6517
	1.579		0.652341
	1.58		0.652983
	1.58		0.653624
	1.581		0.654266
	1.581		0.654907
	1.581		0.655548
	1.581		0.65619
	1.582		0.656831
	1.583		0.657473
	1.584		0.658114
	1.585		0.658756
	1.585		0.659397
	1.587		0.660038
	1.587		0.66068
	1.588		0.661321
	1.589		0.661963
	1.589		0.662604
	1.589		0.663246
	1.59		0.663887
	1.59		0.664529
	1.592		0.66517
	1.593		0.665811
	1.593		0.666453
	1.593		0.667094
	1.594		0.667736
	1.594		0.668377
	1.594		0.669019
	1.596		0.66966
	1.596		0.670301
	1.596		0.670943
	1.596		0.671584
	1.598		0.672226
	1.598		0.672867
	1.599		0.673509
	1.599		0.67415
	1.601		0.674792
	1.601		0.675433
	1.601		0.676074
	1.602		0.676716
	1.602		0.677357
	1.603		0.677999
	1.603		0.67864
	1.604		0.679282
	1.604		0.679923
	1.605		0.680564
	1.608		0.681206
	1.608		0.681847
	1.609		0.682489
	1.61		0.68313
	1.61		0.683772
	1.611		0.684413
	1.612		0.685055
	1.613		0.685696
	1.613		0.686337
	1.613		0.686979
	1.617		0.68762
	1.618		0.688262
	1.618		0.688903
	1.619		0.689545
	1.619		0.690186
	1.619		0.690827
	1.62		0.691469
	1.621		0.69211
	1.622		0.692752
	1.623		0.693393
	1.623		0.694035
	1.623		0.694676
	1.623		0.695318
	1.624		0.695959
	1.624		0.6966
	1.624		0.697242
	1.625		0.697883
	1.625		0.698525
	1.625		0.699166
	1.627		0.699808
	1.631		0.700449
	1.632		0.70109
	1.632		0.701732
	1.633		0.702373
	1.633		0.703015
	1.635		0.703656
	1.635		0.704298
	1.636		0.704939
	1.64		0.705581
	1.64		0.706222
	1.64		0.706863
	1.64		0.707505
	1.642		0.708146
	1.642		0.708788
	1.643		0.709429
	1.644		0.710071
	1.644		0.710712
	1.645		0.711353
	1.646		0.711995
	1.646		0.712636
	1.646		0.713278
	1.646		0.713919
	1.647		0.714561
	1.647		0.715202
	1.647		0.715843
	1.648		0.716485
	1.648		0.717126
	1.649		0.717768
	1.649		0.718409
	1.656		0.719051
	1.656		0.719692
	1.657		0.720334
	1.658		0.720975
	1.659		0.721616
	1.661		0.722258
	1.664		0.722899
	1.664		0.723541
	1.664		0.724182
	1.664		0.724824
	1.671		0.725465
	1.675		0.726106
	1.676		0.726748
	1.679		0.727389
	1.679		0.728031
	1.679		0.728672
	1.679		0.729314
	1.68		0.729955
	1.68		0.730597
	1.681		0.731238
	1.681		0.731879
	1.685		0.732521
	1.687		0.733162
	1.687		0.733804
	1.687		0.734445
	1.687		0.735087
	1.687		0.735728
	1.689		0.736369
	1.692		0.737011
	1.693		0.737652
	1.694		0.738294
	1.694		0.738935
	1.698		0.739577
	1.699		0.740218
	1.701		0.74086
	1.705		0.741501
	1.705		0.742142
	1.706		0.742784
	1.706		0.743425
	1.707		0.744067
	1.71		0.744708
	1.71		0.74535
	1.712		0.745991
	1.714		0.746632
	1.714		0.747274
	1.714		0.747915
	1.715		0.748557
	1.715		0.749198
	1.716		0.74984
	1.716		0.750481
	1.716		0.751123
	1.716		0.751764
	1.716		0.752405
	1.72		0.753047
	1.72		0.753688
	1.721		0.75433
	1.723		0.754971
	1.725		0.755613
	1.725		0.756254
	1.725		0.756895
	1.725		0.757537
	1.725		0.758178
	1.727		0.75882
	1.733		0.759461
	1.734		0.760103
	1.735		0.760744
	1.737		0.761386
	1.737		0.762027
	1.737		0.762668
	1.743		0.76331
	1.744		0.763951
	1.744		0.764593
	1.748		0.765234
	1.752		0.765876
	1.755		0.766517
	1.755		0.767158
	1.757		0.7678
	1.764		0.768441
	1.764		0.769083
	1.764		0.769724
	1.767		0.770366
	1.767		0.771007
	1.768		0.771648
	1.771		0.77229
	1.773		0.772931
	1.773		0.773573
	1.773		0.774214
	1.774		0.774856
	1.774		0.775497
	1.774		0.776139
	1.774		0.77678
	1.775		0.777421
	1.776		0.778063
	1.776		0.778704
	1.778		0.779346
	1.778		0.779987
	1.779		0.780629
	1.789		0.78127
	1.792		0.781911
	1.796		0.782553
[truncated: 339 more rows]

## Sheet: f. Mitochondrial coverage
fed	2.41935	3.43734	9.80686	4.04029	6.4365	3.71036	7.06617	9.82865	10.4957	10.3158	10.431	9.80686	4.04029	6.4365	3.71036	4.35859	4.76759	6.78384	4.35627	4.928	10.0222	6.39515	2.53793	6.16241	8.32786	5.59809	7.99996	5.01052	7.53377	7.64528	11.9568	7.70027	8.77122	9.44427	5.40358	15.891	11.0572	9.24955	8.38991	7.20212
fasted	8.92507	9.04727	3.94407	5.23719	7.15929	4.91993	6.16937	8.08064	7.08172	11.0561	8.40321	5.73627	4.68673	7.54406	4.59336	2.81219	12.8515	4.92067	5.28897	4.88581	7.17342	6.65165	7.19729	7.14233	7.17466	8.62351	9.48777	2.05796	4.84593	12.091	5.26186	8.76985	8.05521	7.73328	5.9989	3.42707	7.62295	6.40147	6.82954	9.68385	4.55127	10.9745	9.34636	5.94396	1.50765	6.2966

## Sheet: g. Relative Agrp mRNA levels
		Fed						Fasted
	Input	0.630277	0.945452	1.41823	1.18835	0.995724		5.18597	4.22461	7.05974	8.28128	1.48801
	IP	51.1027	47.7336	44.5866	29.3877	19.3698		67.4584	140.166	135.246	201.603	175.517

## Sheet: h. Relative Npy mRNA levels
			Fed						Fasted
		Input	1.11518	1.20579	1.53033	0.814721	0.596475		1.73718	1.09061	1.85191	2.11391	6.6042
		IP	20.8479	19.9554	19.1011	12.6897	8.43032		346.352	68.6319	123.489	154.732	63.2239

## Sheet: i Relative Pomc mRNA levels
		Fed						Fasted
	Input	0.850514	1.19627	1.6826	0.994251	0.587506		0.30274	0.32971	0.381987	0.24996	0.53813
	IP	0.001846	0.018701	0.189427	0.306681	0.496514		0.500031	0.31077	0.31185	0.143938	0.422833

## Sheet: j. Relative Nr5a1 mNRA levles
			Fed						Fasted
		Input	2.04719	0.88944	0.386435	0.818921	1.73543		0.605753	1.5319	1.98798	1.67138	1.89011
		IP	0.04458	0.230318	1.18993	1.31328	1.44942		1.09832	2.71016	2.6463	0.910411	1.76465

[truncated: 3 more sheets: k. Relative Dnm1l mRNA levels, r. %pDRP1 positive AgRP neurons, s. #of AgRPneurons in ARC]
