# Supplementary material for: Drp1 is required for AgRP neuronal activity and feeding
Source: eLife. 2021 Mar 9;10:e64351. doi: 10.7554/eLife.64351 (PMC7946429; doi:10.7554/eLife.64351)
Supplement: Figure 2—figure supplement 1—source data 1. [file elife-64351-fig2-figsupp1-data1.xlsx]

## Sheet: d. tdTomato+cells per nucleus
	Dnm1l+/+ -Agrpcre:ERT2
	17.7215
	14.0805
	12.4638
	10.1887
	19.1375
	11.7117
	23.2
	9.52381

## Sheet: e. % of cell viability
		Drp1+/+AgRP Cre
		1	2	3	4
	Vehicle	80.6452	88.2353	86	95
	4OH-TMX	97.0588	81.579	90.625	89.1304
