# Supplementary material for: Drp1 is required for AgRP neuronal activity and feeding
Source: eLife. 2021 Mar 9;10:e64351. doi: 10.7554/eLife.64351 (PMC7946429; doi:10.7554/eLife.64351)
Supplement: Figure 2—source data 1. [file elife-64351-fig2-data1.xlsx]

## Sheet: a. beta oxidation
2.5 mM glucose
		WT BSA							WT-BSA+Eto							WT-PAL:BSA							WT-Pal:bsa +eto
	Time (minutes)
	1.31667	26.0762	24.171	27.2376	24.0108	27.0605	28.1103		24.4813	22.8989	22.0311	23.8481	25.0886	21.0947		33.939	44.7514	50.132	59.9513	56.3698	48.4888		26.3452	29.0209	29.1641	27.723	28.0083	28.4128
	7.98333	26.174	24.1623	27.3545	23.8959	27.092	29.9687		25.991	23.604	21.2455	25.3826	24.7166	22.5312		34.9881	46.15	50.6217	61.536	59.5248	50.233		25.3998	28.8164	29.8891	27.0452	29.8971	27.9992
	14.5833	28.0556	22.4683	25.3418	22.9806	25.8377	27.8167		23.5857	22.6895	21.4203	23.5373	22.8716	22.2703		32.6968	42.4961	46.7421	60.7187	58.6249	48.5067		24.9639	27.4168	28.4048	26.6189	26.2578	26.3934
	21.2167	14.8547	13.6195	16.6584	15.7925	16.1086	19.1126		15.8837	13.8042	13.17	14.3729	11.9695	12.6575		20.9952	29.413	26.9289	30.6263	31.5416	27.0281		12.5512	16.8088	16.9364	16.1551	16.7945	15.1758
	28.1167	17.6392	15.2542	19.6255	17.2015	18.3216	20.9902		18.7735	14.6518	14.0172	16.2989	15.0438	15.3716		21.3187	30.5527	27.2553	29.2179	30.6243	28.8541		15	18.0628	17.612	15.1925	16.1847	16.6134
	34.75	17.9141	15.1668	17.9227	17.1274	17.7261	19.6318		17.4711	14.388	12.5734	14.829	14.5711	13.1166		20.2669	27.9072	25.1841	27.345	28.5991	27.3401		13.8952	16.968	16.7374	15.8619	15.5065	15.7357
	41.3833	45.2449	43.1182	47.1295	41.9276	45.2966	50.0695		44.0738	42.8411	39.9593	44.1955	38.6361	42.3867		60.5972	78.4366	78.172	88.5935	107.064	87.8452		45.9714	50.6653	53.0074	48.5391	47.5722	47.3102
	48.2667	43.7787	41.0215	48.7589	41.9078	44.8524	47.4089		43.15	38.5472	35.8201	43.7368	40.4663	38.7881		58.1708	76.6163	76.0411	83.7598	105.78	86.4409		44.6812	46.9507	51.4122	46.3344	50.0964	48.1569
	54.8833	43.7273	39.5672	41.9861	40.5695	43.6091	48.1949		41.9404	39.8203	33.3637	40.9454	36.4627	38.5124		55.948	72.6749	74.4691	83.4758	104.334	79.9411		41.4414	47.3179	49.7482	42.5918	45.3176	44.4715
	61.5167	24.1767	22.8922	26.9082	24.6837	24.9222	30.1254		26.614	23.1744	22.0142	24.3621	22.1807	22.2094		28.5876	33.859	31.9079	32.2567	33.7458	30.6291		24.3615	25.8906	26.2917	24.3061	24.8506	23.9466
	68.4	21.6787	19.6261	23.3492	20.543	21.3501	27.1752		23.8686	19.5366	19.1244	20.3473	18.5541	18.6542		23.394	29.4426	27.701	28.3649	30.4358	26.8662		19.7503	21.9701	22.853	21.0785	20.955	20.5677
	75.0333	19.9698	16.9925	20.4365	17.8762	18.6886	23.81		20.6994	16.4723	17.4543	17.6343	17.4549	15.7162		22.1688	27.151	24.1608	24.7059	26.7826	25.7957		17.1322	18.3698	18.0308	17.675	17.5398	17.3166

## Sheet: b. quantification
	BSA	BSA Eto	BSA:palm	BSA:Palm+Eto
	30.3902	28.1901	39.602	33.4201
	29.4987	29.0369	49.0236	33.8565
	30.4711	26.7892	51.2431	36.071
	26.135	29.8226	57.9672	32.3839
	29.188	26.6666	75.5221	30.7777
	30.9569	29.7292	60.8171	32.1344

## Sheet: c. beta oxidation
0.5 mM glucose
		control-BSA							control-BSA+Eto							control-Palm:BSA							control-Palm:BSA+Eto
	Time (minutes)	1	2	3	4	5	6		1	2	3	4	5	6		1	2	3	4				1	2	3	4	5	6
	1.31667	14.5757	16.9814	11.6991	35.9242	16.8318	20.1302		19.6915	13.2918	22.641	22.4863	16.9477	23.3837		88.2506	60.9881	52.5583	61.3115				15.3038	36.1934	55.1938	44.5311	59.26	33.5408
	7.95	8.60984	13.1028	15.8759	24.5142	13.4389	20.8107		25.9744	13.7091	23.2142	20.9313	23.1139	21.9425		88.9231	59.2487	54.3207	63.9977				17.1254	35.6334	51.3447	46.1545	61.3376	33.5831
	14.5833	15.6499	17.623	17.7579	31.5697	12.2671	19.7102		23.6626	4.74264	18.625	18.5714	17.4521	20.1311		89.2218	44.4997	49.0933	54.6325				17.2436	28.0919	46.7033	44.3093	60.6565	29.9857
	21.2167	16.7364	14.979	9.38779	22.3378	8.0995	17.2298		13.5044	6.99142	12.7699	14.022	13.1585	13.2854		33.982	12.8242	17.9539	21.6679				6.06168	19.1535	21.9591	9.57667	22.6399	14.203
	28.0833	14.5137	10.3063	10.2323	17.5427	7.86326	17.76		14.2865	9.71934	12.7495	14.6802	9.77665	7.33957		28.264	8.31098	21.0155	21.9886				5.63076	18.6889	22.475	13.6665	19.9193	13.4847
	34.7167	11.75	8.08367	6.59678	15.5345	8.2642	16.2936		11.7989	5.56826	11.746	13.0555	9.88207	11.7307		26.336	10.6988	13.3666	15.5781				6.48308	14.2462	18.5427	12.4697	21.0666	12.1154
	41.35	9.49454	23.214	21.0867	38.4352	8.73109	28.2638		29.8712	15.27	26.3023	34.0715	25.0088	24.2283		115.843	73.4296	86.8585	92.3734				13.3044	30.7066	43.7855	24.2207	47.5663	22.9849
	48.2167	22.5589	25.719	18.5606	39.3115	22.6726	29.2453		26.6645	10.1878	29.3399	30.5819	20.3406	25.5776		101.383	73.2537	78.0403	92.8005				21.5026	24.3606	43.8775	21.3096	37.6236	24.495
	54.8167	20.0623	28.7096	19.9609	36.8624	30.9688	27.7314		33.4739	18.8001	30.6272	29.1162	21.6362	29.9483		89.1179	66.4331	76.6103	76.2181				23.5306	29.9683	38.4881	29.5002	39.859	22.8255
	61.45	11.2024	13.2461	12.9584	18.4086	18.7613	19.9509		19.1908	7.07106	12.5712	16.9839	15.2849	7.66733		28.856	6.83067	18.4629	22.5043				11.2754	18.588	20.2867	10.365	16.5485	6.27785
	68.3167	10.0773	11.4445	14.8971	20.1282	14.7964	17.1322		20.2355	10.32	13.4047	15.245	9.43832	10.6713		24.8635	6.70324	11.8447	8.78346				8.91417	17.4316	20.1906	10.0708	16.2466	8.55564
	74.95	1.39826	13.567	13.059	15.7683	12.2924	17.5597		20.8527	4.60073	11.5522	15.299	6.68076	7.62571		27.8543	11.7318	15.0421	14.7318				4.55628	15.7168	20.15	11.751	12.936	6.72598

## Sheet: d. quantification
	BSA	BSA Eto	BSA:palm	BSA:Palm+Eto
	8.23504	16.3668	81.861	7.24268
	11.6989	8.27856	60.6054	11.5531
	16.0973	13.5324	68.9045	21.8264
	0.631596	20.0495	70.7054	14.644
	11.0341	11.8502		24.9264
		10.9429		8.78195
