# Supplementary material for: Drp1 is required for AgRP neuronal activity and feeding
Source: eLife. 2021 Mar 9;10:e64351. doi: 10.7554/eLife.64351 (PMC7946429; doi:10.7554/eLife.64351)
Supplement: Figure 3—figure supplement 1—source data 1. [file elife-64351-fig3-figsupp1-data1.xlsx]

## Sheet: h. %pDRP1 positive AgRP neurons
	Fed						Fasted
	1	2	3	4			1	2	3	4
	54.2453	61.608	44.0738	49.6305			14.7295	12.4947	12.8655	16.5086

## Sheet: i. #of Agrp neurons in ARC
	Fed						Fasted
	1	2	3	4			1	2	3	4
	146	143	163	149			148	137	148	151
