# Supplementary material for: Drp1 is required for AgRP neuronal activity and feeding
Source: eLife. 2021 Mar 9;10:e64351. doi: 10.7554/eLife.64351 (PMC7946429; doi:10.7554/eLife.64351)
Supplement: Figure 3—figure supplement 2—source data 1. [file elife-64351-fig3-figsupp2-data1.xlsx]

## Sheet: d. tdTomato+cells per nucleus
		Dnm1lfl/fl -Agrpcre:ERT2
	1	28.8889
	2	10.0346
	3	21.875
	4	10.3896
	5	11.6923
	6	11.9718
	7	8.08081

## Sheet: e. % of cell viability
			Drp1+/+AgRP Cre
			1	2	3	4
		Vehicle	88.8889	80.4348	97.2973	95.4545
		4OH-TMX	86.2745	81.8182	87.5	91.8367

## Sheet: f. relative Dnm1l mRNA
			Dnm1l+/+ -Agrpcre:ERT2	Dnm1lfl/fl -Agrpcre:ERT2
		1	0.925759	0.848549
		2	0.79227	0.387308
		3	1.39422	0.117815
		4		0.349372
