# Supplementary material for: Drp1 is required for AgRP neuronal activity and feeding
Source: eLife. 2021 Mar 9;10:e64351. doi: 10.7554/eLife.64351 (PMC7946429; doi:10.7554/eLife.64351)
Supplement: Figure 3—source data 1. [file elife-64351-fig3-data1.xlsx]

## Sheet: c. Ave mitochondrial area
	1	2	3	4	5	6	7	8	9	10	11	12	13	14	15	16	17	18	19	20	21	22	23	24	25	26	27	28	29	30	31	32	33	34	35	36	37	38	39	40	41	42	43	44	45	46	47	48	49
KO fed	0.298182	0.179091	0.249	0.194933	0.302167	0.224846	0.194333	0.21093	0.29856	0.203615	0.201632	0.150037	0.214042	0.195786	0.211929	0.251609	0.155889	0.216444	0.122818	0.137	0.174792	0.255889	0.149706	0.255615	0.219833	0.15875	0.12744	0.133*	0.164857	0.1515	0.149093	0.181964	0.152371
KO fasted	0.168571	0.181652	0.19525	0.183517	0.179553	0.199684	0.199865	0.163762	0.297833	0.137583	0.1985	0.139452	0.148818	0.2008	0.3341	0.169364	0.1946	0.240259	0.2305	0.15	0.094081*	0.149606	0.119077	0.148259	0.138178	0.17381	0.161	0.1245	0.182	0.133103	0.1584	0.211929	0.178857	0.146909	0.1666	0.176627
[truncated: 17 more columns]

## Sheet: c. mitochondrial area prob.
		KOFed	KO fasted
1	0.042	0.00138889
2	0.043	0.00277778
3	0.045	0.00416667
4	0.046	0.00555556
5	0.047	0.00694444
6	0.05	0.00833333
7	0.052	0.00972222
8	0.053	0.0111111
9	0.053	0.0125
10	0.054	0.0138889
11	0.058	0.0152778
12	0.059	0.0166667
13	0.061	0.0180556
14	0.061	0.0194444
15	0.062	0.0208333
16	0.063	0.0222222
17	0.063	0.0236111
18	0.063	0.025
19	0.064	0.0263889
20	0.065	0.0277778
21	0.066	0.0291667
22	0.066	0.0305556
23	0.068	0.0319444
24	0.069	0.0333333
25	0.069	0.0347222
26	0.069	0.0361111
27	0.07	0.0375
28	0.07	0.0388889
29	0.071	0.0402778
30	0.072	0.0416667
31	0.073	0.0430556
32	0.073	0.0444444
33	0.075	0.0458333
34	0.075	0.0472222
35	0.075	0.0486111
36	0.076	0.05
37	0.077	0.0513889
38	0.077	0.0527778
39	0.078	0.0541667
40	0.078	0.0555556
41	0.079	0.0569444
42	0.079	0.0583333
43	0.079	0.0597222
44	0.079	0.0611111
45	0.079	0.0625
46	0.079	0.0638889
47	0.08	0.0652778
48	0.08	0.0666667
49	0.08	0.0680556
50	0.081	0.0694444
51	0.081	0.0708333
52	0.081	0.0722222
53	0.081	0.0736111
54	0.081	0.075
55	0.082	0.0763889
56	0.082	0.0777778
57	0.082	0.0791667
58	0.082	0.0805556
59	0.083	0.0819444
60	0.083	0.0833333
61	0.083	0.0847222
62	0.084	0.0861111
63	0.085	0.0875
64	0.085	0.0888889
65	0.086	0.0902778
66	0.086	0.0916667
67	0.086	0.0930556
68	0.087	0.0944444
69	0.087	0.0958333
70	0.087	0.0972222
71	0.087	0.0986111
72	0.087	0.1
73	0.087	0.101389
74	0.088	0.102778
75	0.088	0.104167
76	0.088	0.105556
77	0.088	0.106944
78	0.088	0.108333
79	0.089	0.109722
80	0.09	0.111111
81	0.09	0.1125
82	0.09	0.113889
83	0.091	0.115278
84	0.093	0.116667
85	0.093	0.118056
86	0.093	0.119444
87	0.093	0.120833
88	0.093	0.122222
89	0.093	0.123611
90	0.093	0.125
91	0.094	0.126389
92	0.094	0.127778
93	0.094	0.129167
94	0.095	0.130556
95	0.096	0.131944
96	0.097	0.133333
97	0.097	0.134722
98	0.097	0.136111
99	0.097	0.1375
100	0.097	0.138889
101	0.097	0.140278
102	0.097	0.141667
103	0.098	0.143056
104	0.098	0.144444
105	0.099	0.145833
106	0.099	0.147222
107	0.099	0.148611
108	0.099	0.15
109	0.1	0.151389
110	0.1	0.152778
111	0.1	0.154167
112	0.101	0.155556
113	0.101	0.156944
114	0.101	0.158333
115	0.102	0.159722
116	0.102	0.161111
117	0.102	0.1625
118	0.103	0.163889
119	0.103	0.165278
120	0.104	0.166667
121	0.104	0.168056
122	0.104	0.169444
123	0.104	0.170833
124	0.104	0.172222
125	0.104	0.173611
126	0.104	0.175
127	0.105	0.176389
128	0.105	0.177778
129	0.105	0.179167
130	0.106	0.180556
131	0.106	0.181944
132	0.106	0.183333
133	0.108	0.184722
134	0.108	0.186111
135	0.108	0.1875
136	0.108	0.188889
137	0.108	0.190278
138	0.109	0.191667
139	0.109	0.193056
140	0.109	0.194444
141	0.11	0.195833
142	0.11	0.197222
143	0.11	0.198611
144	0.111	0.2
145	0.111	0.201389
146	0.112	0.202778
147	0.112	0.204167
148	0.112	0.205556
149	0.112	0.206944
150	0.112	0.208333
151	0.112	0.209722
152	0.113	0.211111
153	0.113	0.2125
154	0.113	0.213889
155	0.113	0.215278
156	0.113	0.216667
157	0.113	0.218056
158	0.114	0.219444
159	0.114	0.220833
160	0.114	0.222222
161	0.116	0.223611
162	0.116	0.225
163	0.116	0.226389
164	0.117	0.227778
165	0.117	0.229167
166	0.117	0.230556
167	0.117	0.231944
168	0.117	0.233333
169	0.117	0.234722
170	0.117	0.236111
171	0.118	0.2375
172	0.118	0.238889
173	0.119	0.240278
174	0.119	0.241667
175	0.119	0.243056
176	0.119	0.244444
177	0.12	0.245833
178	0.12	0.247222
179	0.12	0.248611
180	0.121	0.25
181	0.121	0.251389
182	0.121	0.252778
183	0.122	0.254167
184	0.124	0.255556
185	0.124	0.256944
186	0.124	0.258333
187	0.124	0.259722
188	0.124	0.261111
189	0.125	0.2625
190	0.125	0.263889
191	0.125	0.265278
192	0.127	0.266667
193	0.127	0.268056
194	0.127	0.269444
195	0.128	0.270833
196	0.128	0.272222
197	0.129	0.273611
198	0.129	0.275
199	0.129	0.276389
200	0.129	0.277778
201	0.13	0.279167
202	0.13	0.280556
203	0.13	0.281944
204	0.13	0.283333
205	0.131	0.284722
206	0.131	0.286111
207	0.131	0.2875
208	0.131	0.288889
209	0.131	0.290278
210	0.131	0.291667
211	0.131	0.293056
212	0.132	0.294444
213	0.132	0.295833
214	0.132	0.297222
215	0.132	0.298611
216	0.132	0.3
217	0.132	0.301389
218	0.132	0.302778
219	0.132	0.304167
220	0.132	0.305556
221	0.133	0.306944
222	0.133	0.308333
223	0.134	0.309722
224	0.135	0.311111
225	0.136	0.3125
226	0.136	0.313889
227	0.136	0.315278
228	0.136	0.316667
229	0.137	0.318056
230	0.137	0.319444
231	0.137	0.320833
232	0.137	0.322222
233	0.137	0.323611
234	0.137	0.325
235	0.137	0.326389
236	0.137	0.327778
237	0.138	0.329167
238	0.138	0.330556
239	0.138	0.331944
240	0.138	0.333333
241	0.138	0.334722
242	0.138	0.336111
243	0.139	0.3375
244	0.139	0.338889
245	0.139	0.340278
246	0.139	0.341667
247	0.139	0.343056
248	0.14	0.344444
249	0.14	0.345833
250	0.14	0.347222
251	0.14	0.348611
252	0.14	0.35
253	0.14	0.351389
254	0.14	0.352778
255	0.141	0.354167
256	0.141	0.355556
257	0.141	0.356944
258	0.141	0.358333
259	0.141	0.359722
260	0.141	0.361111
261	0.142	0.3625
262	0.142	0.363889
263	0.142	0.365278
264	0.143	0.366667
265	0.143	0.368056
266	0.143	0.369444
267	0.143	0.370833
268	0.144	0.372222
269	0.144	0.373611
270	0.144	0.375
271	0.144	0.376389
272	0.145	0.377778
273	0.145	0.379167
274	0.145	0.380556
275	0.145	0.381944
276	0.146	0.383333
277	0.146	0.384722
278	0.148	0.386111
279	0.148	0.3875
280	0.148	0.388889
281	0.148	0.390278
282	0.148	0.391667
283	0.148	0.393056
284	0.149	0.394444
285	0.149	0.395833
286	0.149	0.397222
287	0.149	0.398611
288	0.15	0.4
289	0.15	0.401389
290	0.15	0.402778
291	0.15	0.404167
292	0.151	0.405556
293	0.151	0.406944
294	0.152	0.408333
295	0.152	0.409722
296	0.152	0.411111
297	0.152	0.4125
298	0.152	0.413889
299	0.153	0.415278
300	0.153	0.416667
301	0.153	0.418056
302	0.153	0.419444
303	0.154	0.420833
304	0.154	0.422222
305	0.155	0.423611
306	0.155	0.425
307	0.155	0.426389
308	0.155	0.427778
309	0.155	0.429167
310	0.156	0.430556
311	0.156	0.431944
312	0.157	0.433333
313	0.157	0.434722
314	0.158	0.436111
315	0.158	0.4375
316	0.158	0.438889
317	0.159	0.440278
318	0.159	0.441667
319	0.16	0.443056
320	0.161	0.444444
321	0.161	0.445833
322	0.162	0.447222
323	0.162	0.448611
324	0.162	0.45
325	0.162	0.451389
326	0.162	0.452778
327	0.162	0.454167
328	0.163	0.455556
329	0.163	0.456944
330	0.164	0.458333
331	0.165	0.459722
332	0.165	0.461111
333	0.165	0.4625
334	0.165	0.463889
335	0.165	0.465278
336	0.166	0.466667
337	0.166	0.468056
338	0.166	0.469444
339	0.166	0.470833
340	0.166	0.472222
341	0.166	0.473611
342	0.167	0.475
343	0.167	0.476389
344	0.167	0.477778
345	0.168	0.479167
346	0.168	0.480556
347	0.168	0.481944
348	0.168	0.483333
349	0.168	0.484722
350	0.169	0.486111
351	0.169	0.4875
352	0.169	0.488889
353	0.169	0.490278
354	0.169	0.491667
355	0.17	0.493056
356	0.17	0.494444
357	0.17	0.495833
358	0.171	0.497222
359	0.171	0.498611
360	0.171	0.5
361	0.171	0.501389
362	0.171	0.502778
363	0.172	0.504167
364	0.173	0.505556
365	0.173	0.506944
366	0.174	0.508333
367	0.174	0.509722
368	0.174	0.511111
369	0.174	0.5125
370	0.175	0.513889
371	0.175	0.515278
372	0.175	0.516667
373	0.176	0.518056
374	0.176	0.519444
375	0.176	0.520833
376	0.177	0.522222
377	0.177	0.523611
378	0.177	0.525
379	0.177	0.526389
380	0.178	0.527778
381	0.178	0.529167
382	0.178	0.530556
383	0.179	0.531944
384	0.179	0.533333
385	0.179	0.534722
386	0.179	0.536111
387	0.18	0.5375
388	0.181	0.538889
389	0.182	0.540278
390	0.182	0.541667
391	0.182	0.543056
392	0.182	0.544444
393	0.182	0.545833
394	0.183	0.547222
395	0.183	0.548611
396	0.184	0.55
397	0.185	0.551389
398	0.186	0.552778
399	0.186	0.554167
400	0.186	0.555556
401	0.186	0.556944
402	0.186	0.558333
403	0.187	0.559722
404	0.187	0.561111
405	0.187	0.5625
406	0.189	0.563889
407	0.189	0.565278
408	0.189	0.566667
409	0.189	0.568056
410	0.189	0.569444
411	0.189	0.570833
412	0.189	0.572222
413	0.19	0.573611
414	0.19	0.575
415	0.191	0.576389
416	0.191	0.577778
417	0.191	0.579167
418	0.192	0.580556
419	0.192	0.581944
420	0.192	0.583333
421	0.193	0.584722
422	0.193	0.586111
423	0.193	0.5875
424	0.194	0.588889
425	0.195	0.590278
426	0.195	0.591667
427	0.195	0.593056
428	0.195	0.594444
429	0.195	0.595833
430	0.195	0.597222
431	0.195	0.598611
432	0.196	0.6
433	0.197	0.601389
434	0.197	0.602778
435	0.197	0.604167
436	0.198	0.605556
437	0.198	0.606944
438	0.198	0.608333
439	0.199	0.609722
440	0.199	0.611111
441	0.2	0.6125
442	0.2	0.613889
443	0.2	0.615278
444	0.2	0.616667
445	0.2	0.618056
446	0.2	0.619444
447	0.201	0.620833
448	0.201	0.622222
449	0.201	0.623611
450	0.202	0.625
451	0.202	0.626389
452	0.203	0.627778
453	0.203	0.629167
454	0.203	0.630556
455	0.204	0.631944
456	0.204	0.633333
457	0.205	0.634722
458	0.205	0.636111
459	0.206	0.6375
460	0.206	0.638889
461	0.206	0.640278
462	0.207	0.641667
463	0.207	0.643056
464	0.207	0.644444
465	0.208	0.645833
466	0.209	0.647222
467	0.21	0.648611
468	0.21	0.65
469	0.211	0.651389
470	0.212	0.652778
471	0.212	0.654167
472	0.212	0.655556
473	0.213	0.656944
474	0.213	0.658333
475	0.213	0.659722
476	0.213	0.661111
477	0.213	0.6625
478	0.213	0.663889
479	0.214	0.665278
480	0.215	0.666667
481	0.215	0.668056
482	0.215	0.669444
483	0.216	0.670833
484	0.216	0.672222
485	0.216	0.673611
486	0.216	0.675
487	0.217	0.676389
488	0.218	0.677778
489	0.218	0.679167
490	0.218	0.680556
491	0.218	0.681944
492	0.218	0.683333
493	0.218	0.684722
494	0.219	0.686111
495	0.219	0.6875
496	0.22	0.688889
497	0.22	0.690278
498	0.22	0.691667
499	0.22	0.693056
500	0.221	0.694444
501	0.221	0.695833
502	0.221	0.697222
503	0.221	0.698611
504	0.221	0.7
505	0.222	0.701389
506	0.223	0.702778
507	0.224	0.704167
508	0.224	0.705556
509	0.225	0.706944
510	0.225	0.708333
511	0.225	0.709722
512	0.226	0.711111
513	0.226	0.7125
514	0.226	0.713889
515	0.227	0.715278
516	0.227	0.716667
517	0.227	0.718056
518	0.228	0.719444
519	0.228	0.720833
520	0.228	0.722222
521	0.229	0.723611
522	0.229	0.725
523	0.229	0.726389
524	0.23	0.727778
525	0.23	0.729167
526	0.231	0.730556
527	0.231	0.731944
528	0.231	0.733333
529	0.232	0.734722
530	0.232	0.736111
531	0.232	0.7375
532	0.233	0.738889
533	0.233	0.740278
534	0.233	0.741667
535	0.233	0.743056
536	0.233	0.744444
537	0.233	0.745833
538	0.233	0.747222
539	0.233	0.748611
540	0.234	0.75
541	0.234	0.751389
542	0.234	0.752778
543	0.235	0.754167
544	0.235	0.755556
545	0.235	0.756944
546	0.236	0.758333
547	0.236	0.759722
548	0.236	0.761111
549	0.236	0.7625
550	0.237	0.763889
551	0.237	0.765278
552	0.238	0.766667
553	0.238	0.768056
554	0.239	0.769444
555	0.24	0.770833
556	0.241	0.772222
557	0.241	0.773611
558	0.241	0.775
559	0.241	0.776389
560	0.242	0.777778
561	0.242	0.779167
562	0.243	0.780556
563	0.243	0.781944
564	0.244	0.783333
565	0.245	0.784722
566	0.245	0.786111
567	0.245	0.7875
568	0.246	0.788889
569	0.247	0.790278
570	0.248	0.791667
571	0.249	0.793056
572	0.249	0.794444
573	0.25	0.795833
574	0.25	0.797222
575	0.25	0.798611
576	0.251	0.8
577	0.251	0.801389
578	0.251	0.802778
579	0.253	0.804167
580	0.253	0.805556
581	0.253	0.806944
582	0.253	0.808333
583	0.253	0.809722
584	0.253	0.811111
585	0.254	0.8125
586	0.254	0.813889
587	0.254	0.815278
588	0.255	0.816667
589	0.255	0.818056
590	0.256	0.819444
591	0.256	0.820833
592	0.256	0.822222
593	0.257	0.823611
594	0.257	0.825
595	0.257	0.826389
596	0.259	0.827778
597	0.26	0.829167
598	0.26	0.830556
599	0.26	0.831944
600	0.26	0.833333
601	0.261	0.834722
602	0.261	0.836111
603	0.263	0.8375
604	0.265	0.838889
605	0.266	0.840278
606	0.268	0.841667
607	0.268	0.843056
608	0.268	0.844444
609	0.269	0.845833
610	0.269	0.847222
611	0.271	0.848611
612	0.273	0.85
613	0.274	0.851389
614	0.277	0.852778
615	0.279	0.854167
616	0.279	0.855556
617	0.28	0.856944
618	0.28	0.858333
619	0.28	0.859722
620	0.281	0.861111
621	0.283	0.8625
622	0.284	0.863889
623	0.284	0.865278
624	0.284	0.866667
625	0.285	0.868056
626	0.285	0.869444
627	0.289	0.870833
628	0.289	0.872222
629	0.29	0.873611
630	0.292	0.875
631	0.293	0.876389
632	0.294	0.877778
633	0.294	0.879167
634	0.298	0.880556
635	0.3	0.881944
636	0.301	0.883333
637	0.303	0.884722
638	0.304	0.886111
639	0.305	0.8875
640	0.306	0.888889
641	0.31	0.890278
642	0.311	0.891667
643	0.311	0.893056
644	0.312	0.894444
645	0.316	0.895833
646	0.317	0.897222
647	0.318	0.898611
648	0.319	0.9
649	0.319	0.901389
650	0.319	0.902778
651	0.32	0.904167
652	0.321	0.905556
653	0.322	0.906944
654	0.326	0.908333
655	0.328	0.909722
656	0.328	0.911111
657	0.329	0.9125
658	0.331	0.913889
659	0.332	0.915278
660	0.332	0.916667
661	0.333	0.918056
662	0.337	0.919444
663	0.337	0.920833
664	0.338	0.922222
665	0.338	0.923611
666	0.342	0.925
667	0.344	0.926389
668	0.352	0.927778
669	0.352	0.929167
670	0.354	0.930556
671	0.355	0.931944
672	0.359	0.933333
673	0.36	0.934722
674	0.361	0.936111
675	0.363	0.9375
676	0.366	0.938889
677	0.367	0.940278
678	0.368	0.941667
679	0.372	0.943056
680	0.372	0.944444
681	0.378	0.945833
682	0.38	0.947222
683	0.385	0.948611
684	0.386	0.95
685	0.386	0.951389
686	0.393	0.952778
687	0.393	0.954167
688	0.393	0.955556
689	0.402	0.956944
690	0.403	0.958333
691	0.412	0.959722
692	0.414	0.961111
693	0.423	0.9625
694	0.433	0.963889
695	0.433	0.965278
696	0.436	0.966667
697	0.448	0.968056
698	0.448	0.969444
699	0.448	0.970833
700	0.46	0.972222
701	0.465	0.973611
702	0.478	0.975
703	0.48	0.976389
704	0.492	0.977778
705	0.513	0.979167
706	0.518	0.980556
707	0.543	0.981944
708	0.548	0.983333
709	0.556	0.984722
710	0.572	0.986111
711	0.589	0.9875
712	0.601	0.988889
713	0.631	0.990278
714	0.646	0.991667
715	0.702	0.993056
716	0.708	0.994444
717	0.727	0.995833
718	0.757	0.997222
719	0.784	0.998611
720	0.91	1
721	0.032		0.00134
722	0.033		0.00268
723	0.041		0.00402
724	0.042		0.00536
725	0.043		0.0067
726	0.044		0.00804
727	0.045		0.00938
728	0.045		0.01072
729	0.047		0.01206
730	0.05		0.0134
731	0.052		0.01475
732	0.053		0.01609
733	0.053		0.01743
734	0.055		0.01877
735	0.057		0.02011
736	0.058		0.02145
737	0.058		0.02279
738	0.058		0.02413
739	0.058		0.02547
740	0.058		0.02681
741	0.058		0.02815
742	0.059		0.02949
743	0.059		0.03083
744	0.06		0.03217
745	0.06		0.03351
746	0.061		0.03485
747	0.063		0.03619
748	0.063		0.03753
749	0.064		0.03887
750	0.064		0.04021
751	0.064		0.04155
752	0.065		0.0429
753	0.065		0.04424
754	0.066		0.04558
755	0.067		0.04692
756	0.067		0.04826
757	0.067		0.0496
758	0.068		0.05094
759	0.068		0.05228
760	0.068		0.05362
761	0.068		0.05496
762	0.069		0.0563
763	0.069		0.05764
764	0.07		0.05898
765	0.07		0.06032
766	0.07		0.06166
767	0.07		0.063
768	0.07		0.06434
769	0.071		0.06568
770	0.071		0.06702
771	0.071		0.06836
772	0.071		0.06971
773	0.071		0.07105
774	0.071		0.07239
775	0.071		0.07373
776	0.072		0.07507
777	0.072		0.07641
778	0.072		0.07775
779	0.072		0.07909
780	0.073		0.08043
781	0.073		0.08177
782	0.073		0.08311
783	0.073		0.08445
784	0.073		0.08579
785	0.073		0.08713
786	0.073		0.08847
787	0.074		0.08981
788	0.074		0.09115
789	0.075		0.09249
790	0.075		0.09383
791	0.075		0.09517
792	0.076		0.09651
793	0.076		0.09786
794	0.076		0.0992
795	0.076		0.10054
796	0.076		0.10188
797	0.076		0.10322
798	0.077		0.10456
799	0.077		0.1059
800	0.077		0.10724
801	0.078		0.10858
802	0.078		0.10992
803	0.078		0.11126
804	0.078		0.1126
805	0.078		0.11394
806	0.079		0.11528
807	0.079		0.11662
808	0.079		0.11796
809	0.08		0.1193
810	0.08		0.12064
811	0.08		0.12198
812	0.08		0.12332
813	0.08		0.12466
814	0.08		0.12601
815	0.081		0.12735
816	0.081		0.12869
817	0.081		0.13003
818	0.082		0.13137
819	0.082		0.13271
820	0.082		0.13405
821	0.082		0.13539
822	0.083		0.13673
823	0.083		0.13807
824	0.083		0.13941
825	0.083		0.14075
826	0.083		0.14209
827	0.083		0.14343
828	0.083		0.14477
829	0.084		0.14611
830	0.084		0.14745
831	0.084		0.14879
832	0.084		0.15013
833	0.085		0.15147
834	0.085		0.15282
835	0.085		0.15416
836	0.085		0.1555
837	0.086		0.15684
838	0.086		0.15818
839	0.087		0.15952
840	0.087		0.16086
841	0.087		0.1622
842	0.088		0.16354
843	0.088		0.16488
844	0.088		0.16622
845	0.088		0.16756
846	0.088		0.1689
847	0.089		0.17024
848	0.089		0.17158
849	0.089		0.17292
850	0.089		0.17426
851	0.089		0.1756
852	0.089		0.17694
853	0.09		0.17828
854	0.09		0.17962
855	0.09		0.18097
856	0.09		0.18231
857	0.09		0.18365
858	0.09		0.18499
859	0.091		0.18633
860	0.091		0.18767
861	0.092		0.18901
862	0.092		0.19035
863	0.092		0.19169
864	0.093		0.19303
865	0.093		0.19437
866	0.093		0.19571
867	0.093		0.19705
868	0.093		0.19839
869	0.093		0.19973
870	0.093		0.20107
871	0.093		0.20241
872	0.093		0.20375
873	0.094		0.20509
874	0.094		0.20643
875	0.094		0.20777
876	0.094		0.20912
877	0.094		0.21046
878	0.094		0.2118
879	0.094		0.21314
880	0.094		0.21448
881	0.095		0.21582
882	0.095		0.21716
883	0.096		0.2185
884	0.096		0.21984
885	0.096		0.22118
886	0.096		0.22252
887	0.096		0.22386
888	0.096		0.2252
889	0.097		0.22654
890	0.097		0.22788
891	0.097		0.22922
892	0.097		0.23056
893	0.097		0.2319
894	0.097		0.23324
895	0.098		0.23458
896	0.098		0.23592
897	0.098		0.23727
898	0.098		0.23861
899	0.098		0.23995
900	0.098		0.24129
901	0.098		0.24263
902	0.099		0.24397
903	0.099		0.24531
904	0.099		0.24665
905	0.099		0.24799
906	0.099		0.24933
907	0.1		0.25067
908	0.1		0.25201
909	0.101		0.25335
910	0.101		0.25469
911	0.101		0.25603
912	0.101		0.25737
913	0.101		0.25871
914	0.102		0.26005
915	0.102		0.26139
916	0.102		0.26273
917	0.102		0.26408
918	0.102		0.26542
919	0.103		0.26676
920	0.104		0.2681
921	0.104		0.26944
922	0.104		0.27078
923	0.104		0.27212
924	0.104		0.27346
925	0.105		0.2748
926	0.105		0.27614
927	0.105		0.27748
928	0.105		0.27882
929	0.105		0.28016
930	0.106		0.2815
931	0.106		0.28284
932	0.106		0.28418
933	0.106		0.28552
934	0.106		0.28686
935	0.106		0.2882
936	0.107		0.28954
937	0.107		0.29088
938	0.107		0.29223
939	0.107		0.29357
940	0.107		0.29491
941	0.108		0.29625
942	0.108		0.29759
943	0.108		0.29893
944	0.108		0.30027
945	0.108		0.30161
946	0.108		0.30295
947	0.109		0.30429
948	0.109		0.30563
949	0.109		0.30697
950	0.109		0.30831
951	0.109		0.30965
952	0.11		0.31099
953	0.11		0.31233
954	0.11		0.31367
955	0.11		0.31501
956	0.11		0.31635
957	0.111		0.31769
958	0.111		0.31903
959	0.111		0.32038
960	0.111		0.32172
961	0.111		0.32306
962	0.111		0.3244
963	0.111		0.32574
964	0.111		0.32708
965	0.112		0.32842
966	0.112		0.32976
967	0.113		0.3311
968	0.113		0.33244
969	0.113		0.33378
970	0.113		0.33512
971	0.114		0.33646
972	0.114		0.3378
973	0.115		0.33914
974	0.115		0.34048
975	0.115		0.34182
976	0.115		0.34316
977	0.115		0.3445
978	0.115		0.34584
979	0.115		0.34718
980	0.116		0.34853
981	0.116		0.34987
982	0.116		0.35121
983	0.117		0.35255
984	0.117		0.35389
985	0.117		0.35523
986	0.118		0.35657
987	0.118		0.35791
988	0.118		0.35925
989	0.118		0.36059
990	0.119		0.36193
991	0.119		0.36327
992	0.119		0.36461
993	0.119		0.36595
994	0.119		0.36729
995	0.119		0.36863
996	0.119		0.36997
997	0.119		0.37131
998	0.12		0.37265
999	0.12		0.37399
1000	0.12		0.37534
1001	0.12		0.37668
1002	0.12		0.37802
1003	0.121		0.37936
1004	0.122		0.3807
1005	0.122		0.38204
1006	0.122		0.38338
1007	0.122		0.38472
1008	0.123		0.38606
1009	0.123		0.3874
1010	0.123		0.38874
1011	0.124		0.39008
1012	0.124		0.39142
1013	0.124		0.39276
1014	0.124		0.3941
1015	0.125		0.39544
1016	0.125		0.39678
1017	0.125		0.39812
1018	0.126		0.39946
1019	0.126		0.4008
1020	0.126		0.40214
1021	0.127		0.40349
1022	0.127		0.40483
1023	0.128		0.40617
1024	0.128		0.40751
1025	0.128		0.40885
1026	0.129		0.41019
1027	0.129		0.41153
1028	0.129		0.41287
1029	0.129		0.41421
1030	0.129		0.41555
1031	0.129		0.41689
1032	0.129		0.41823
1033	0.13		0.41957
1034	0.13		0.42091
1035	0.13		0.42225
1036	0.13		0.42359
1037	0.13		0.42493
1038	0.131		0.42627
1039	0.131		0.42761
1040	0.131		0.42895
1041	0.131		0.43029
1042	0.131		0.43164
1043	0.131		0.43298
1044	0.132		0.43432
1045	0.133		0.43566
1046	0.133		0.437
1047	0.133		0.43834
1048	0.134		0.43968
1049	0.134		0.44102
1050	0.135		0.44236
1051	0.135		0.4437
1052	0.135		0.44504
1053	0.135		0.44638
1054	0.135		0.44772
1055	0.135		0.44906
1056	0.135		0.4504
1057	0.136		0.45174
1058	0.136		0.45308
1059	0.136		0.45442
1060	0.136		0.45576
1061	0.137		0.4571
1062	0.137		0.45845
1063	0.137		0.45979
1064	0.137		0.46113
1065	0.137		0.46247
1066	0.138		0.46381
1067	0.138		0.46515
1068	0.138		0.46649
1069	0.139		0.46783
1070	0.139		0.46917
1071	0.139		0.47051
1072	0.139		0.47185
1073	0.139		0.47319
1074	0.139		0.47453
1075	0.14		0.47587
1076	0.14		0.47721
1077	0.14		0.47855
1078	0.141		0.47989
1079	0.141		0.48123
1080	0.141		0.48257
1081	0.141		0.48391
1082	0.142		0.48525
1083	0.143		0.4866
1084	0.143		0.48794
1085	0.143		0.48928
1086	0.143		0.49062
1087	0.144		0.49196
1088	0.144		0.4933
1089	0.144		0.49464
1090	0.145		0.49598
1091	0.146		0.49732
1092	0.146		0.49866
1093	0.146		0.5
1094	0.147		0.50134
1095	0.147		0.50268
1096	0.147		0.50402
1097	0.147		0.50536
1098	0.148		0.5067
1099	0.148		0.50804
1100	0.148		0.50938
1101	0.148		0.51072
1102	0.149		0.51206
1103	0.149		0.5134
1104	0.15		0.51475
1105	0.15		0.51609
1106	0.151		0.51743
1107	0.151		0.51877
1108	0.151		0.52011
1109	0.151		0.52145
1110	0.151		0.52279
1111	0.151		0.52413
1112	0.151		0.52547
1113	0.152		0.52681
1114	0.152		0.52815
1115	0.152		0.52949
1116	0.152		0.53083
1117	0.152		0.53217
1118	0.152		0.53351
1119	0.153		0.53485
1120	0.153		0.53619
1121	0.154		0.53753
1122	0.154		0.53887
1123	0.155		0.54021
1124	0.155		0.54155
1125	0.155		0.5429
1126	0.155		0.54424
1127	0.155		0.54558
1128	0.155		0.54692
1129	0.156		0.54826
1130	0.156		0.5496
1131	0.156		0.55094
1132	0.156		0.55228
1133	0.156		0.55362
1134	0.156		0.55496
1135	0.156		0.5563
1136	0.156		0.55764
1137	0.156		0.55898
1138	0.157		0.56032
1139	0.157		0.56166
1140	0.157		0.563
1141	0.157		0.56434
1142	0.158		0.56568
1143	0.158		0.56702
1144	0.158		0.56836
1145	0.158		0.56971
1146	0.158		0.57105
1147	0.158		0.57239
1148	0.158		0.57373
1149	0.159		0.57507
1150	0.159		0.57641
1151	0.159		0.57775
1152	0.16		0.57909
1153	0.16		0.58043
1154	0.16		0.58177
1155	0.16		0.58311
1156	0.16		0.58445
1157	0.16		0.58579
1158	0.161		0.58713
1159	0.161		0.58847
1160	0.161		0.58981
1161	0.161		0.59115
1162	0.161		0.59249
1163	0.161		0.59383
1164	0.161		0.59517
1165	0.161		0.59651
1166	0.162		0.59786
1167	0.163		0.5992
1168	0.163		0.60054
1169	0.163		0.60188
1170	0.163		0.60322
1171	0.164		0.60456
1172	0.164		0.6059
1173	0.164		0.60724
1174	0.165		0.60858
1175	0.165		0.60992
1176	0.165		0.61126
1177	0.165		0.6126
1178	0.166		0.61394
1179	0.166		0.61528
1180	0.166		0.61662
1181	0.166		0.61796
1182	0.167		0.6193
1183	0.168		0.62064
1184	0.168		0.62198
1185	0.168		0.62332
1186	0.168		0.62466
1187	0.168		0.62601
1188	0.169		0.62735
1189	0.17		0.62869
1190	0.171		0.63003
1191	0.171		0.63137
1192	0.172		0.63271
1193	0.172		0.63405
1194	0.172		0.63539
1195	0.173		0.63673
1196	0.173		0.63807
1197	0.173		0.63941
1198	0.173		0.64075
1199	0.174		0.64209
1200	0.175		0.64343
1201	0.175		0.64477
1202	0.175		0.64611
1203	0.175		0.64745
1204	0.175		0.64879
1205	0.176		0.65013
1206	0.176		0.65147
1207	0.178		0.65282
1208	0.178		0.65416
1209	0.178		0.6555
1210	0.178		0.65684
1211	0.179		0.65818
1212	0.179		0.65952
1213	0.179		0.66086
1214	0.179		0.6622
1215	0.179		0.66354
1216	0.18		0.66488
1217	0.18		0.66622
1218	0.18		0.66756
1219	0.181		0.6689
1220	0.182		0.67024
1221	0.182		0.67158
1222	0.182		0.67292
1223	0.183		0.67426
1224	0.183		0.6756
1225	0.183		0.67694
1226	0.183		0.67828
1227	0.184		0.67962
1228	0.184		0.68097
1229	0.184		0.68231
1230	0.184		0.68365
1231	0.185		0.68499
1232	0.186		0.68633
1233	0.186		0.68767
1234	0.186		0.68901
1235	0.187		0.69035
1236	0.187		0.69169
1237	0.188		0.69303
1238	0.188		0.69437
1239	0.189		0.69571
1240	0.189		0.69705
1241	0.191		0.69839
1242	0.191		0.69973
1243	0.192		0.70107
1244	0.193		0.70241
1245	0.193		0.70375
1246	0.193		0.70509
1247	0.193		0.70643
1248	0.194		0.70777
1249	0.194		0.70912
1250	0.194		0.71046
1251	0.194		0.7118
1252	0.195		0.71314
1253	0.195		0.71448
1254	0.198		0.71582
1255	0.198		0.71716
1256	0.198		0.7185
1257	0.199		0.71984
1258	0.199		0.72118
1259	0.199		0.72252
1260	0.199		0.72386
1261	0.2		0.7252
1262	0.2		0.72654
1263	0.201		0.72788
1264	0.201		0.72922
1265	0.201		0.73056
1266	0.201		0.7319
1267	0.202		0.73324
1268	0.202		0.73458
1269	0.202		0.73592
1270	0.202		0.73727
1271	0.202		0.73861
1272	0.203		0.73995
1273	0.203		0.74129
1274	0.204		0.74263
1275	0.204		0.74397
1276	0.204		0.74531
1277	0.204		0.74665
1278	0.204		0.74799
1279	0.205		0.74933
1280	0.205		0.75067
1281	0.205		0.75201
1282	0.206		0.75335
1283	0.206		0.75469
1284	0.206		0.75603
1285	0.207		0.75737
1286	0.207		0.75871
1287	0.207		0.76005
1288	0.207		0.76139
1289	0.207		0.76273
1290	0.207		0.76408
1291	0.207		0.76542
1292	0.208		0.76676
1293	0.208		0.7681
1294	0.209		0.76944
1295	0.209		0.77078
1296	0.209		0.77212
1297	0.21		0.77346
1298	0.21		0.7748
1299	0.21		0.77614
1300	0.211		0.77748
1301	0.211		0.77882
1302	0.211		0.78016
1303	0.211		0.7815
1304	0.212		0.78284
1305	0.212		0.78418
1306	0.213		0.78552
1307	0.214		0.78686
1308	0.215		0.7882
1309	0.219		0.78954
1310	0.219		0.79088
1311	0.22		0.79223
1312	0.22		0.79357
1313	0.22		0.79491
1314	0.222		0.79625
1315	0.222		0.79759
1316	0.222		0.79893
1317	0.224		0.80027
1318	0.225		0.80161
1319	0.225		0.80295
1320	0.226		0.80429
1321	0.226		0.80563
1322	0.226		0.80697
1323	0.226		0.80831
1324	0.227		0.80965
1325	0.228		0.81099
1326	0.228		0.81233
1327	0.228		0.81367
1328	0.229		0.81501
1329	0.231		0.81635
1330	0.232		0.81769
1331	0.232		0.81903
1332	0.232		0.82038
1333	0.232		0.82172
1334	0.234		0.82306
1335	0.234		0.8244
1336	0.235		0.82574
1337	0.236		0.82708
1338	0.236		0.82842
1339	0.236		0.82976
1340	0.236		0.8311
1341	0.237		0.83244
1342	0.238		0.83378
1343	0.238		0.83512
1344	0.238		0.83646
1345	0.24		0.8378
1346	0.241		0.83914
1347	0.241		0.84048
1348	0.241		0.84182
1349	0.242		0.84316
1350	0.242		0.8445
1351	0.243		0.84584
1352	0.244		0.84718
1353	0.244		0.84853
1354	0.245		0.84987
1355	0.246		0.85121
1356	0.246		0.85255
1357	0.247		0.85389
1358	0.247		0.85523
1359	0.248		0.85657
1360	0.25		0.85791
1361	0.252		0.85925
1362	0.252		0.86059
1363	0.253		0.86193
1364	0.253		0.86327
1365	0.253		0.86461
1366	0.255		0.86595
1367	0.255		0.86729
1368	0.255		0.86863
1369	0.255		0.86997
1370	0.256		0.87131
1371	0.258		0.87265
1372	0.258		0.87399
1373	0.259		0.87534
1374	0.26		0.87668
1375	0.26		0.87802
1376	0.263		0.87936
1377	0.263		0.8807
1378	0.265		0.88204
1379	0.269		0.88338
1380	0.27		0.88472
1381	0.274		0.88606
1382	0.275		0.8874
1383	0.276		0.88874
1384	0.276		0.89008
1385	0.277		0.89142
1386	0.278		0.89276
1387	0.278		0.8941
1388	0.278		0.89544
1389	0.283		0.89678
1390	0.283		0.89812
1391	0.284		0.89946
1392	0.285		0.9008
1393	0.286		0.90214
1394	0.287		0.90349
1395	0.288		0.90483
1396	0.289		0.90617
1397	0.29		0.90751
1398	0.291		0.90885
1399	0.291		0.91019
1400	0.291		0.91153
1401	0.292		0.91287
1402	0.292		0.91421
1403	0.293		0.91555
1404	0.293		0.91689
1405	0.293		0.91823
1406	0.294		0.91957
1407	0.294		0.92091
1408	0.298		0.92225
1409	0.299		0.92359
1410	0.301		0.92493
1411	0.301		0.92627
1412	0.301		0.92761
1413	0.304		0.92895
1414	0.306		0.93029
1415	0.312		0.93164
1416	0.313		0.93298
1417	0.314		0.93432
1418	0.316		0.93566
1419	0.317		0.937
1420	0.317		0.93834
1421	0.318		0.93968
1422	0.318		0.94102
1423	0.323		0.94236
1424	0.325		0.9437
1425	0.329		0.94504
1426	0.33		0.94638
1427	0.334		0.94772
1428	0.335		0.94906
1429	0.335		0.9504
1430	0.338		0.95174
1431	0.338		0.95308
1432	0.339		0.95442
1433	0.344		0.95576
1434	0.347		0.9571
1435	0.35		0.95845
1436	0.356		0.95979
1437	0.358		0.96113
1438	0.36		0.96247
1439	0.363		0.96381
1440	0.364		0.96515
1441	0.364		0.96649
1442	0.364		0.96783
1443	0.368		0.96917
1444	0.372		0.97051
1445	0.375		0.97185
1446	0.376		0.97319
1447	0.381		0.97453
1448	0.399		0.97587
1449	0.405		0.97721
1450	0.406		0.97855
1451	0.414		0.97989
1452	0.415		0.98123
1453	0.443		0.98257
1454	0.466		0.98391
1455	0.466		0.98525
1456	0.477		0.9866
1457	0.489		0.98794
1458	0.596		0.98928
1459	0.605		0.99062
1460	0.613		0.99196
1461	0.636		0.9933
1462	0.651		0.99464
1463	0.676		0.99598
1464	0.751		0.99732
1465	0.91		0.99866
1466	1.064		1

## Sheet: d. # of mitochondria-cyto
	1	2	3	4	5	6	7	8	9	10	11	12	13	14	15	16	17	18	19	20	21	22	23	24	25	26	27	28	29	30	31	32	33	34	35	36
cKO fed	0.239136	0.45344	0.232787	0.240581	0.247637	0.408938	0.32228	0.397964	0.302997	0.272046	0.588144	0.674241	0.573813	0.452518	0.481464	0.471423	0.622342	0.22544	0.532533	0.763942	0.547464	0.35214	0.535635	0.36077	0.131245	0.307102	0.825001	0.064396*	0.529781	0.684502	0.914427	0.486965	0.477548
cKO fasted	0.189702	0.650673	0.448544	0.396549	0.493956	0.523863	0.499689	0.41747	0.164042*	0.51761	0.216597	0.786523	0.832324	0.205838	0.43448	0.429704	0.424665	0.366186	0.281007	0.235211	0.911038	0.603522	0.254393	0.465293	0.595443	0.418152	0.247709	0.417319	0.232919	0.581716	0.283905	0.572012	0.325294	0.32581	0.304952	0.610122

## Sheet: e. AR
		1	2	3	4	5	6	7	8	9	10	11	12	13	14	15	16	17	18	19	20	21	22	23	24	25	26	27	28	29	30	31	32	33	34	35	36
	cKO fed	2.21491	1.63727	1.34125	1.4144	1.471	1.42956	2.00489	1.49286	1.2702	1.259846*	1.54916	1.6953	1.62862	1.60714	1.60964	1.77824	1.85847	1.43	1.58973	1.47095	1.67862	1.53672	1.56088	1.71131	1.59933	2.2245	1.45148	2.2785	1.68319	1.70117	1.99128	1.93121	1.80949
	cKO fasted	1.58029	1.52817	2.24681	1.71448	1.71618	1.79426	2.37157	1.93843	1.6175	1.63442	1.7995	1.65795	1.84286	1.723	2.5153*	1.87182	1.66	1.99781	1.93	1.58875	1.68692	1.63361	1.93854	1.98718	2.16393	2.01519	1.8516	1.4331	1.44483	1.67774	1.3311	1.73393	1.58657	1.50136	1.51653	1.92744

## Sheet: e. AR probability
		cKO	cKO
		fed	fasted
1	1.019	0.00138889
2	1.024	0.00277778
3	1.035	0.00416667
4	1.045	0.00555556
5	1.047	0.00694444
6	1.049	0.00833333
7	1.049	0.00972222
8	1.051	0.0111111
9	1.059	0.0125
10	1.061	0.0138889
11	1.062	0.0152778
12	1.071	0.0166667
13	1.075	0.0180556
14	1.08	0.0194444
15	1.082	0.0208333
16	1.082	0.0222222
17	1.084	0.0236111
18	1.091	0.025
19	1.102	0.0263889
20	1.102	0.0277778
21	1.103	0.0291667
22	1.106	0.0305556
23	1.108	0.0319444
24	1.11	0.0333333
25	1.117	0.0347222
26	1.118	0.0361111
27	1.119	0.0375
28	1.119	0.0388889
29	1.121	0.0402778
30	1.122	0.0416667
31	1.123	0.0430556
32	1.127	0.0444444
33	1.128	0.0458333
34	1.128	0.0472222
35	1.132	0.0486111
36	1.133	0.05
37	1.152	0.0513889
38	1.153	0.0527778
39	1.153	0.0541667
40	1.153	0.0555556
41	1.154	0.0569444
42	1.156	0.0583333
43	1.158	0.0597222
44	1.164	0.0611111
45	1.167	0.0625
46	1.167	0.0638889
47	1.168	0.0652778
48	1.168	0.0666667
49	1.172	0.0680556
50	1.172	0.0694444
51	1.176	0.0708333
52	1.177	0.0722222
53	1.179	0.0736111
54	1.179	0.075
55	1.18	0.0763889
56	1.181	0.0777778
57	1.181	0.0791667
58	1.183	0.0805556
59	1.183	0.0819444
60	1.185	0.0833333
61	1.186	0.0847222
62	1.189	0.0861111
63	1.191	0.0875
64	1.191	0.0888889
65	1.191	0.0902778
66	1.192	0.0916667
67	1.193	0.0930556
68	1.194	0.0944444
69	1.194	0.0958333
70	1.195	0.0972222
71	1.196	0.0986111
72	1.198	0.1
73	1.198	0.101389
74	1.198	0.102778
75	1.199	0.104167
76	1.2	0.105556
77	1.2	0.106944
78	1.2	0.108333
79	1.201	0.109722
80	1.202	0.111111
81	1.202	0.1125
82	1.203	0.113889
83	1.204	0.115278
84	1.207	0.116667
85	1.208	0.118056
86	1.208	0.119444
87	1.213	0.120833
88	1.213	0.122222
89	1.214	0.123611
90	1.222	0.125
91	1.222	0.126389
92	1.223	0.127778
93	1.223	0.129167
94	1.223	0.130556
95	1.224	0.131944
96	1.225	0.133333
97	1.225	0.134722
98	1.229	0.136111
99	1.229	0.1375
100	1.23	0.138889
101	1.23	0.140278
102	1.231	0.141667
103	1.232	0.143056
104	1.232	0.144444
105	1.233	0.145833
106	1.234	0.147222
107	1.234	0.148611
108	1.236	0.15
109	1.237	0.151389
110	1.237	0.152778
111	1.238	0.154167
112	1.238	0.155556
113	1.24	0.156944
114	1.241	0.158333
115	1.241	0.159722
116	1.244	0.161111
117	1.244	0.1625
118	1.245	0.163889
119	1.246	0.165278
120	1.246	0.166667
121	1.247	0.168056
122	1.247	0.169444
123	1.249	0.170833
124	1.249	0.172222
125	1.25	0.173611
126	1.251	0.175
127	1.256	0.176389
128	1.256	0.177778
129	1.258	0.179167
130	1.258	0.180556
131	1.259	0.181944
132	1.26	0.183333
133	1.261	0.184722
134	1.261	0.186111
135	1.262	0.1875
136	1.262	0.188889
137	1.263	0.190278
138	1.264	0.191667
139	1.264	0.193056
140	1.265	0.194444
141	1.267	0.195833
142	1.267	0.197222
143	1.268	0.198611
144	1.27	0.2
145	1.27	0.201389
146	1.272	0.202778
147	1.272	0.204167
148	1.273	0.205556
149	1.273	0.206944
150	1.274	0.208333
151	1.274	0.209722
152	1.274	0.211111
153	1.275	0.2125
154	1.275	0.213889
155	1.278	0.215278
156	1.278	0.216667
157	1.28	0.218056
158	1.28	0.219444
159	1.281	0.220833
160	1.281	0.222222
161	1.283	0.223611
162	1.284	0.225
163	1.284	0.226389
164	1.284	0.227778
165	1.285	0.229167
166	1.285	0.230556
167	1.286	0.231944
168	1.288	0.233333
169	1.29	0.234722
170	1.29	0.236111
171	1.292	0.2375
172	1.293	0.238889
173	1.293	0.240278
174	1.294	0.241667
175	1.295	0.243056
176	1.296	0.244444
177	1.297	0.245833
178	1.297	0.247222
179	1.298	0.248611
180	1.298	0.25
181	1.299	0.251389
182	1.303	0.252778
183	1.303	0.254167
184	1.304	0.255556
185	1.304	0.256944
186	1.304	0.258333
187	1.305	0.259722
188	1.305	0.261111
189	1.307	0.2625
190	1.307	0.263889
191	1.307	0.265278
192	1.307	0.266667
193	1.31	0.268056
194	1.313	0.269444
195	1.313	0.270833
196	1.314	0.272222
197	1.314	0.273611
198	1.319	0.275
199	1.32	0.276389
200	1.32	0.277778
201	1.32	0.279167
202	1.321	0.280556
203	1.324	0.281944
204	1.325	0.283333
205	1.326	0.284722
206	1.327	0.286111
207	1.329	0.2875
208	1.33	0.288889
209	1.33	0.290278
210	1.33	0.291667
211	1.33	0.293056
212	1.331	0.294444
213	1.332	0.295833
214	1.332	0.297222
215	1.332	0.298611
216	1.334	0.3
217	1.336	0.301389
218	1.336	0.302778
219	1.337	0.304167
220	1.338	0.305556
221	1.341	0.306944
222	1.342	0.308333
223	1.342	0.309722
224	1.343	0.311111
225	1.343	0.3125
226	1.343	0.313889
227	1.346	0.315278
228	1.346	0.316667
229	1.346	0.318056
230	1.347	0.319444
231	1.347	0.320833
232	1.349	0.322222
233	1.349	0.323611
234	1.35	0.325
235	1.35	0.326389
236	1.351	0.327778
237	1.352	0.329167
238	1.353	0.330556
239	1.357	0.331944
240	1.357	0.333333
241	1.358	0.334722
242	1.358	0.336111
243	1.358	0.3375
244	1.358	0.338889
245	1.359	0.340278
246	1.36	0.341667
247	1.363	0.343056
248	1.363	0.344444
249	1.364	0.345833
250	1.364	0.347222
251	1.365	0.348611
252	1.366	0.35
253	1.367	0.351389
254	1.367	0.352778
255	1.37	0.354167
256	1.373	0.355556
257	1.373	0.356944
258	1.375	0.358333
259	1.375	0.359722
260	1.376	0.361111
261	1.377	0.3625
262	1.378	0.363889
263	1.379	0.365278
264	1.38	0.366667
265	1.38	0.368056
266	1.382	0.369444
267	1.385	0.370833
268	1.386	0.372222
269	1.387	0.373611
270	1.388	0.375
271	1.388	0.376389
272	1.389	0.377778
273	1.389	0.379167
274	1.391	0.380556
275	1.394	0.381944
276	1.396	0.383333
277	1.396	0.384722
278	1.396	0.386111
279	1.396	0.3875
280	1.396	0.388889
281	1.398	0.390278
282	1.398	0.391667
283	1.398	0.393056
284	1.399	0.394444
285	1.4	0.395833
286	1.401	0.397222
287	1.401	0.398611
288	1.401	0.4
289	1.401	0.401389
290	1.402	0.402778
291	1.403	0.404167
292	1.405	0.405556
293	1.406	0.406944
294	1.407	0.408333
295	1.408	0.409722
296	1.413	0.411111
297	1.414	0.4125
298	1.417	0.413889
299	1.418	0.415278
300	1.419	0.416667
301	1.419	0.418056
302	1.42	0.419444
303	1.423	0.420833
304	1.424	0.422222
305	1.425	0.423611
306	1.426	0.425
307	1.426	0.426389
308	1.428	0.427778
309	1.429	0.429167
310	1.43	0.430556
311	1.433	0.431944
312	1.436	0.433333
313	1.436	0.434722
314	1.438	0.436111
315	1.438	0.4375
316	1.439	0.438889
317	1.44	0.440278
318	1.445	0.441667
319	1.446	0.443056
320	1.447	0.444444
321	1.448	0.445833
322	1.45	0.447222
323	1.451	0.448611
324	1.452	0.45
325	1.452	0.451389
326	1.453	0.452778
327	1.454	0.454167
328	1.454	0.455556
329	1.455	0.456944
330	1.455	0.458333
331	1.457	0.459722
332	1.458	0.461111
333	1.458	0.4625
334	1.459	0.463889
335	1.46	0.465278
336	1.46	0.466667
337	1.461	0.468056
338	1.462	0.469444
339	1.464	0.470833
340	1.466	0.472222
341	1.467	0.473611
342	1.468	0.475
343	1.471	0.476389
344	1.471	0.477778
345	1.472	0.479167
346	1.472	0.480556
347	1.472	0.481944
348	1.473	0.483333
349	1.473	0.484722
350	1.475	0.486111
351	1.476	0.4875
352	1.478	0.488889
353	1.48	0.490278
354	1.48	0.491667
355	1.482	0.493056
356	1.482	0.494444
357	1.484	0.495833
358	1.484	0.497222
359	1.485	0.498611
360	1.485	0.5
361	1.485	0.501389
362	1.486	0.502778
363	1.488	0.504167
364	1.488	0.505556
365	1.489	0.506944
366	1.492	0.508333
367	1.492	0.509722
368	1.495	0.511111
369	1.496	0.5125
370	1.497	0.513889
371	1.498	0.515278
372	1.499	0.516667
373	1.5	0.518056
374	1.501	0.519444
375	1.501	0.520833
376	1.502	0.522222
377	1.504	0.523611
378	1.504	0.525
379	1.504	0.526389
380	1.505	0.527778
381	1.506	0.529167
382	1.506	0.530556
383	1.508	0.531944
384	1.509	0.533333
385	1.511	0.534722
386	1.512	0.536111
387	1.515	0.5375
388	1.515	0.538889
389	1.517	0.540278
390	1.518	0.541667
391	1.518	0.543056
392	1.52	0.544444
393	1.521	0.545833
394	1.521	0.547222
395	1.522	0.548611
396	1.522	0.55
397	1.523	0.551389
398	1.528	0.552778
399	1.528	0.554167
400	1.53	0.555556
401	1.531	0.556944
402	1.535	0.558333
403	1.537	0.559722
404	1.538	0.561111
405	1.538	0.5625
406	1.541	0.563889
407	1.541	0.565278
408	1.544	0.566667
409	1.544	0.568056
410	1.545	0.569444
411	1.545	0.570833
412	1.549	0.572222
413	1.549	0.573611
414	1.551	0.575
415	1.553	0.576389
416	1.554	0.577778
417	1.555	0.579167
418	1.557	0.580556
419	1.559	0.581944
420	1.56	0.583333
421	1.562	0.584722
422	1.566	0.586111
423	1.567	0.5875
424	1.568	0.588889
425	1.57	0.590278
426	1.571	0.591667
427	1.574	0.593056
428	1.574	0.594444
429	1.575	0.595833
430	1.575	0.597222
431	1.578	0.598611
432	1.581	0.6
433	1.583	0.601389
434	1.587	0.602778
435	1.592	0.604167
436	1.592	0.605556
437	1.592	0.606944
438	1.596	0.608333
439	1.597	0.609722
440	1.601	0.611111
441	1.603	0.6125
442	1.605	0.613889
443	1.606	0.615278
444	1.608	0.616667
445	1.608	0.618056
446	1.609	0.619444
447	1.609	0.620833
448	1.61	0.622222
449	1.612	0.623611
450	1.615	0.625
451	1.615	0.626389
452	1.618	0.627778
453	1.621	0.629167
454	1.622	0.630556
455	1.627	0.631944
456	1.628	0.633333
457	1.629	0.634722
458	1.631	0.636111
459	1.632	0.6375
460	1.633	0.638889
461	1.633	0.640278
462	1.633	0.641667
463	1.633	0.643056
464	1.635	0.644444
465	1.641	0.645833
466	1.646	0.647222
467	1.653	0.648611
468	1.655	0.65
469	1.659	0.651389
470	1.659	0.652778
471	1.661	0.654167
472	1.663	0.655556
473	1.666	0.656944
474	1.667	0.658333
475	1.669	0.659722
476	1.67	0.661111
477	1.673	0.6625
478	1.677	0.663889
479	1.677	0.665278
480	1.681	0.666667
481	1.687	0.668056
482	1.691	0.669444
483	1.692	0.670833
484	1.695	0.672222
485	1.695	0.673611
486	1.696	0.675
487	1.696	0.676389
488	1.699	0.677778
489	1.701	0.679167
490	1.702	0.680556
491	1.704	0.681944
492	1.705	0.683333
493	1.705	0.684722
494	1.706	0.686111
495	1.706	0.6875
496	1.706	0.688889
497	1.712	0.690278
498	1.713	0.691667
499	1.724	0.693056
500	1.725	0.694444
501	1.725	0.695833
502	1.726	0.697222
503	1.728	0.698611
504	1.729	0.7
505	1.732	0.701389
506	1.733	0.702778
507	1.736	0.704167
508	1.737	0.705556
509	1.739	0.706944
510	1.747	0.708333
511	1.748	0.709722
512	1.751	0.711111
513	1.754	0.7125
514	1.755	0.713889
515	1.757	0.715278
516	1.759	0.716667
517	1.766	0.718056
518	1.766	0.719444
519	1.767	0.720833
520	1.77	0.722222
521	1.784	0.723611
522	1.787	0.725
523	1.789	0.726389
524	1.79	0.727778
525	1.798	0.729167
526	1.801	0.730556
527	1.802	0.731944
528	1.803	0.733333
529	1.803	0.734722
530	1.806	0.736111
531	1.814	0.7375
532	1.819	0.738889
533	1.821	0.740278
534	1.826	0.741667
535	1.831	0.743056
536	1.836	0.744444
537	1.837	0.745833
538	1.837	0.747222
539	1.837	0.748611
540	1.838	0.75
541	1.838	0.751389
542	1.838	0.752778
543	1.849	0.754167
544	1.853	0.755556
545	1.856	0.756944
546	1.871	0.758333
547	1.873	0.759722
548	1.881	0.761111
549	1.891	0.7625
550	1.898	0.763889
551	1.905	0.765278
552	1.912	0.766667
553	1.914	0.768056
554	1.914	0.769444
555	1.917	0.770833
556	1.919	0.772222
557	1.925	0.773611
558	1.927	0.775
559	1.928	0.776389
560	1.936	0.777778
561	1.954	0.779167
562	1.956	0.780556
563	1.88667	0.781944
564	1.964	0.783333
565	1.966	0.784722
566	1.967	0.786111
567	1.984	0.7875
568	1.984	0.788889
569	1.988	0.790278
570	2.015	0.791667
571	2.018	0.793056
572	2.022	0.794444
573	2.027	0.795833
574	2.028	0.797222
575	2.029	0.798611
576	2.031	0.8
577	2.032	0.801389
578	2.034	0.802778
579	2.034	0.804167
580	2.035	0.805556
581	2.038	0.806944
582	2.039	0.808333
583	2.047	0.809722
584	2.054	0.811111
585	2.068	0.8125
586	2.07	0.813889
587	2.074	0.815278
588	2.083	0.816667
589	2.092	0.818056
590	2.093	0.819444
591	2.1	0.820833
592	2.111	0.822222
593	2.117	0.823611
594	2.13	0.825
595	2.132	0.826389
596	2.135	0.827778
597	2.136	0.829167
598	2.139	0.830556
599	2.151	0.831944
600	2.161	0.833333
601	2.164	0.834722
602	2.169	0.836111
603	2.176	0.8375
604	2.176	0.838889
605	2.179	0.840278
606	2.184	0.841667
607	2.185	0.843056
608	2.185	0.844444
609	2.186	0.845833
610	2.195	0.847222
611	2.202	0.848611
612	2.202	0.85
613	2.207	0.851389
614	2.213	0.852778
615	2.214	0.854167
616	2.214	0.855556
617	2.229	0.856944
618	2.24	0.858333
619	2.25	0.859722
620	2.258	0.861111
621	2.26	0.8625
622	2.266	0.863889
623	2.273	0.865278
624	2.279	0.866667
625	2.284	0.868056
626	2.289	0.869444
627	2.294	0.870833
628	2.294	0.872222
629	2.301	0.873611
630	2.301	0.875
631	2.317	0.876389
632	2.322	0.877778
633	2.329	0.879167
634	2.344	0.880556
635	2.36	0.881944
636	2.365	0.883333
637	2.372	0.884722
638	2.375	0.886111
639	2.402	0.8875
640	2.413	0.888889
641	2.416	0.890278
642	2.421	0.891667
643	2.423	0.893056
644	2.424	0.894444
645	2.425	0.895833
646	2.425	0.897222
647	2.431	0.898611
648	2.436	0.9
649	2.445	0.901389
650	2.445	0.902778
651	2.461	0.904167
652	2.501	0.905556
653	2.504	0.906944
654	2.506	0.908333
655	2.51	0.909722
656	2.515	0.911111
657	2.52	0.9125
658	2.553	0.913889
659	2.557	0.915278
660	2.568	0.916667
661	2.57	0.918056
662	2.576	0.919444
663	2.636	0.920833
664	2.653	0.922222
665	2.655	0.923611
666	2.664	0.925
667	2.666	0.926389
668	2.697	0.927778
669	2.697	0.929167
670	2.7	0.930556
671	2.701	0.931944
672	2.709	0.933333
673	2.714	0.934722
674	2.722	0.936111
675	2.734	0.9375
676	2.751	0.938889
677	2.758	0.940278
678	2.761	0.941667
679	2.848	0.943056
680	2.855	0.944444
681	2.856	0.945833
682	2.92	0.947222
683	2.923	0.948611
684	2.933	0.95
685	2.934	0.951389
686	2.952	0.952778
687	2.965	0.954167
688	2.98	0.955556
689	2.984	0.956944
690	3.014	0.958333
691	3.076	0.959722
692	3.08	0.961111
693	3.095	0.9625
694	3.1	0.963889
695	3.108	0.965278
696	3.123	0.966667
697	3.139	0.968056
698	3.159	0.969444
699	3.166	0.970833
700	3.243	0.972222
701	3.265	0.973611
702	3.284	0.975
703	3.427	0.976389
704	3.448	0.977778
705	3.503	0.979167
706	3.522	0.980556
707	3.616	0.981944
708	3.694	0.983333
709	3.955	0.984722
710	4.186	0.986111
711	4.213	0.9875
712	4.269	0.988889
713	4.47	0.990278
714	4.673	0.991667
715	4.793	0.993056
716	4.891	0.994444
717	4.929	0.995833
718	5.018	0.997222
719	5.435	0.998611
720	5.654	1
721	1.01		0.00134
722	1.011		0.002681
723	1.025		0.004021
724	1.025		0.005362
725	1.027		0.006702
726	1.028		0.008043
727	1.037		0.009383
728	1.042		0.010724
729	1.044		0.012064
730	1.049		0.013405
731	1.052		0.014745
732	1.053		0.016086
733	1.055		0.017426
734	1.055		0.018767
735	1.056		0.020107
736	1.066		0.021448
737	1.066		0.022788
738	1.071		0.024129
739	1.072		0.025469
740	1.074		0.02681
741	1.077		0.02815
742	1.079		0.029491
743	1.081		0.030831
744	1.085		0.032172
745	1.088		0.033512
746	1.098		0.034853
747	1.107		0.036193
748	1.11		0.037534
749	1.111		0.038874
750	1.116		0.040214
751	1.116		0.041555
752	1.117		0.042895
753	1.117		0.044236
754	1.119		0.045576
755	1.119		0.046917
756	1.124		0.048257
757	1.125		0.049598
758	1.126		0.050938
759	1.128		0.052279
760	1.13		0.053619
761	1.133		0.05496
762	1.134		0.0563
763	1.136		0.057641
764	1.136		0.058981
765	1.137		0.060322
766	1.137		0.061662
767	1.138		0.063003
768	1.142		0.064343
769	1.145		0.065684
770	1.147		0.067024
771	1.148		0.068365
772	1.148		0.069705
773	1.149		0.071046
774	1.15		0.072386
775	1.151		0.073727
776	1.152		0.075067
777	1.152		0.076408
778	1.153		0.077748
779	1.154		0.079088
780	1.154		0.080429
781	1.154		0.081769
782	1.155		0.08311
783	1.155		0.08445
784	1.163		0.085791
785	1.165		0.087131
786	1.168		0.088472
787	1.169		0.089812
788	1.169		0.091153
789	1.171		0.092493
790	1.172		0.093834
791	1.173		0.095174
792	1.174		0.096515
793	1.175		0.097855
794	1.175		0.099196
795	1.175		0.100536
796	1.176		0.101877
797	1.18		0.103217
798	1.18		0.104558
799	1.182		0.105898
800	1.182		0.107239
801	1.183		0.108579
802	1.185		0.10992
803	1.187		0.11126
804	1.187		0.112601
805	1.187		0.113941
806	1.189		0.115282
807	1.19		0.116622
808	1.191		0.117962
809	1.192		0.119303
810	1.195		0.120643
811	1.195		0.121984
812	1.198		0.123324
813	1.198		0.124665
814	1.198		0.126005
815	1.199		0.127346
816	1.2		0.128686
817	1.202		0.130027
818	1.203		0.131367
819	1.203		0.132708
820	1.203		0.134048
821	1.204		0.135389
822	1.207		0.136729
823	1.207		0.13807
824	1.21		0.13941
825	1.211		0.140751
826	1.212		0.142091
827	1.212		0.143432
828	1.215		0.144772
829	1.215		0.146113
830	1.215		0.147453
831	1.215		0.148794
832	1.216		0.150134
833	1.217		0.151475
834	1.222		0.152815
835	1.222		0.154155
836	1.222		0.155496
837	1.223		0.156836
838	1.224		0.158177
839	1.225		0.159517
840	1.225		0.160858
841	1.226		0.162198
842	1.227		0.163539
843	1.228		0.164879
844	1.228		0.16622
845	1.23		0.16756
846	1.23		0.168901
847	1.231		0.170241
848	1.231		0.171582
849	1.231		0.172922
850	1.234		0.174263
851	1.235		0.175603
852	1.235		0.176944
853	1.235		0.178284
854	1.236		0.179625
855	1.237		0.180965
856	1.237		0.182306
857	1.238		0.183646
858	1.238		0.184987
859	1.239		0.186327
860	1.24		0.187668
861	1.241		0.189008
862	1.243		0.190349
863	1.244		0.191689
864	1.245		0.193029
865	1.246		0.19437
866	1.247		0.19571
867	1.248		0.197051
868	1.249		0.198391
869	1.249		0.199732
870	1.251		0.201072
871	1.251		0.202413
872	1.252		0.203753
873	1.252		0.205094
874	1.253		0.206434
875	1.254		0.207775
876	1.257		0.209115
877	1.257		0.210456
878	1.26		0.211796
879	1.266		0.213137
880	1.268		0.214477
881	1.269		0.215818
882	1.27		0.217158
883	1.27		0.218499
884	1.271		0.219839
885	1.271		0.22118
886	1.272		0.22252
887	1.272		0.223861
888	1.272		0.225201
889	1.28		0.226542
890	1.282		0.227882
891	1.283		0.229223
892	1.284		0.230563
893	1.285		0.231903
894	1.285		0.233244
895	1.285		0.234584
896	1.287		0.235925
897	1.29		0.237265
898	1.291		0.238606
899	1.296		0.239946
900	1.296		0.241287
901	1.296		0.242627
902	1.297		0.243968
903	1.302		0.245308
904	1.302		0.246649
905	1.302		0.247989
906	1.305		0.24933
907	1.306		0.25067
908	1.307		0.252011
909	1.308		0.253351
910	1.309		0.254692
911	1.309		0.256032
912	1.309		0.257373
913	1.31		0.258713
914	1.31		0.260054
915	1.31		0.261394
916	1.312		0.262735
917	1.312		0.264075
918	1.313		0.265416
919	1.316		0.266756
920	1.316		0.268097
921	1.316		0.269437
922	1.32		0.270777
923	1.32		0.272118
924	1.32		0.273458
925	1.321		0.274799
926	1.323		0.276139
927	1.325		0.27748
928	1.326		0.27882
929	1.327		0.280161
930	1.328		0.281501
931	1.329		0.282842
932	1.329		0.284182
933	1.33		0.285523
934	1.332		0.286863
935	1.332		0.288204
936	1.334		0.289544
937	1.335		0.290885
938	1.335		0.292225
939	1.336		0.293566
940	1.339		0.294906
941	1.339		0.296247
942	1.339		0.297587
943	1.339		0.298928
944	1.339		0.300268
945	1.34		0.301609
946	1.341		0.302949
947	1.341		0.30429
948	1.342		0.30563
949	1.344		0.306971
950	1.344		0.308311
951	1.344		0.309651
952	1.344		0.310992
953	1.344		0.312332
954	1.346		0.313673
955	1.349		0.315013
956	1.35		0.316354
957	1.352		0.317694
958	1.352		0.319035
959	1.352		0.320375
960	1.352		0.321716
961	1.353		0.323056
962	1.354		0.324397
963	1.354		0.325737
964	1.358		0.327078
965	1.359		0.328418
966	1.36		0.329759
967	1.36		0.331099
968	1.361		0.33244
969	1.363		0.33378
970	1.364		0.335121
971	1.364		0.336461
972	1.365		0.337802
973	1.365		0.339142
974	1.367		0.340483
975	1.367		0.341823
976	1.368		0.343164
977	1.37		0.344504
978	1.37		0.345845
979	1.377		0.347185
980	1.377		0.348525
981	1.377		0.349866
982	1.381		0.351206
983	1.384		0.352547
984	1.385		0.353887
985	1.385		0.355228
986	1.386		0.356568
987	1.39		0.357909
988	1.393		0.359249
989	1.393		0.36059
990	1.394		0.36193
991	1.395		0.363271
992	1.395		0.364611
993	1.395		0.365952
994	1.395		0.367292
995	1.395		0.368633
996	1.396		0.369973
997	1.398		0.371314
998	1.398		0.372654
999	1.401		0.373995
1000	1.402		0.375335
1001	1.403		0.376676
1002	1.403		0.378016
1003	1.406		0.379357
1004	1.41		0.380697
1005	1.41		0.382038
1006	1.412		0.383378
1007	1.412		0.384718
1008	1.413		0.386059
1009	1.413		0.387399
1010	1.414		0.38874
1011	1.415		0.39008
1012	1.415		0.391421
1013	1.415		0.392761
1014	1.415		0.394102
1015	1.416		0.395442
1016	1.418		0.396783
1017	1.419		0.398123
1018	1.42		0.399464
1019	1.424		0.400804
1020	1.426		0.402145
1021	1.426		0.403485
1022	1.426		0.404826
1023	1.427		0.406166
1024	1.43		0.407507
1025	1.43		0.408847
1026	1.432		0.410188
1027	1.434		0.411528
1028	1.438		0.412869
1029	1.439		0.414209
1030	1.439		0.41555
1031	1.44		0.41689
1032	1.441		0.418231
1033	1.442		0.419571
1034	1.442		0.420912
1035	1.443		0.422252
1036	1.443		0.423592
1037	1.444		0.424933
1038	1.444		0.426273
1039	1.444		0.427614
1040	1.446		0.428954
1041	1.447		0.430295
1042	1.452		0.431635
1043	1.453		0.432976
1044	1.454		0.434316
1045	1.459		0.435657
1046	1.459		0.436997
1047	1.46		0.438338
1048	1.461		0.439678
1049	1.462		0.441019
1050	1.462		0.442359
1051	1.463		0.4437
1052	1.464		0.44504
1053	1.466		0.446381
1054	1.468		0.447721
1055	1.469		0.449062
1056	1.469		0.450402
1057	1.47		0.451743
1058	1.472		0.453083
1059	1.473		0.454424
1060	1.474		0.455764
1061	1.476		0.457105
1062	1.477		0.458445
1063	1.477		0.459786
1064	1.477		0.461126
1065	1.48		0.462466
1066	1.48		0.463807
1067	1.48		0.465147
1068	1.484		0.466488
1069	1.485		0.467828
1070	1.485		0.469169
1071	1.495		0.470509
1072	1.498		0.47185
1073	1.498		0.47319
1074	1.5		0.474531
1075	1.502		0.475871
1076	1.502		0.477212
1077	1.503		0.478552
1078	1.503		0.479893
1079	1.505		0.481233
1080	1.507		0.482574
1081	1.511		0.483914
1082	1.514		0.485255
1083	1.514		0.486595
1084	1.517		0.487936
1085	1.521		0.489276
1086	1.526		0.490617
1087	1.527		0.491957
1088	1.527		0.493298
1089	1.528		0.494638
1090	1.531		0.495979
1091	1.531		0.497319
1092	1.533		0.49866
1093	1.534		0.5
1094	1.534		0.50134
1095	1.537		0.502681
1096	1.538		0.504021
1097	1.542		0.505362
1098	1.542		0.506702
1099	1.543		0.508043
1100	1.545		0.509383
1101	1.547		0.510724
1102	1.549		0.512064
1103	1.55		0.513405
1104	1.55		0.514745
1105	1.556		0.516086
1106	1.558		0.517426
1107	1.558		0.518767
1108	1.559		0.520107
1109	1.559		0.521448
1110	1.561		0.522788
1111	1.563		0.524129
1112	1.563		0.525469
1113	1.563		0.52681
1114	1.564		0.52815
1115	1.566		0.529491
1116	1.567		0.530831
1117	1.576		0.532172
1118	1.578		0.533512
1119	1.578		0.534853
1120	1.581		0.536193
1121	1.584		0.537534
1122	1.587		0.538874
1123	1.588		0.540214
1124	1.595		0.541555
1125	1.599		0.542895
1126	1.601		0.544236
1127	1.601		0.545576
1128	1.602		0.546917
1129	1.603		0.548257
1130	1.605		0.549598
1131	1.608		0.550938
1132	1.609		0.552279
1133	1.612		0.553619
1134	1.612		0.55496
1135	1.616		0.5563
1136	1.619		0.557641
1137	1.625		0.558981
1138	1.625		0.560322
1139	1.628		0.561662
1140	1.629		0.563003
1141	1.632		0.564343
1142	1.64		0.565684
1143	1.642		0.567024
1144	1.644		0.568365
1145	1.646		0.569705
1146	1.65		0.571046
1147	1.651		0.572386
1148	1.654		0.573727
1149	1.658		0.575067
1150	1.659		0.576408
1151	1.669		0.577748
1152	1.67		0.579088
1153	1.671		0.580429
1154	1.672		0.581769
1155	1.675		0.58311
1156	1.679		0.58445
1157	1.683		0.585791
1158	1.684		0.587131
1159	1.687		0.588472
1160	1.69		0.589812
1161	1.696		0.591153
1162	1.697		0.592493
1163	1.699		0.593834
1164	1.701		0.595174
1165	1.709		0.596515
1166	1.709		0.597855
1167	1.713		0.599196
1168	1.714		0.600536
1169	1.718		0.601877
1170	1.722		0.603217
1171	1.722		0.604558
1172	1.722		0.605898
1173	1.723		0.607239
1174	1.726		0.608579
1175	1.732		0.60992
1176	1.739		0.61126
1177	1.741		0.612601
1178	1.744		0.613941
1179	1.744		0.615282
1180	1.755		0.616622
1181	1.756		0.617962
1182	1.759		0.619303
1183	1.771		0.620643
1184	1.775		0.621984
1185	1.781		0.623324
1186	1.782		0.624665
1187	1.783		0.626005
1188	1.784		0.627346
1189	1.784		0.628686
1190	1.788		0.630027
1191	1.795		0.631367
1192	1.798		0.632708
1193	1.804		0.634048
1194	1.804		0.635389
1195	1.809		0.636729
1196	1.809		0.63807
1197	1.811		0.63941
1198	1.811		0.640751
1199	1.811		0.642091
1200	1.814		0.643432
1201	1.816		0.644772
1202	1.819		0.646113
1203	1.821		0.647453
1204	1.822		0.648794
1205	1.822		0.650134
1206	1.827		0.651475
1207	1.827		0.652815
1208	1.827		0.654155
1209	1.831		0.655496
1210	1.835		0.656836
1211	1.841		0.658177
1212	1.843		0.659517
1213	1.847		0.660858
1214	1.85		0.662198
1215	1.853		0.663539
1216	1.855		0.664879
1217	1.858		0.66622
1218	1.865		0.66756
1219	1.865		0.668901
1220	1.867		0.670241
1221	1.868		0.671582
1222	1.868		0.672922
1223	1.87		0.674263
1224	1.872		0.675603
1225	1.872		0.676944
1226	1.873		0.678284
1227	1.879		0.679625
1228	1.879		0.680965
1229	1.884		0.682306
1230	1.885		0.683646
1231	1.886		0.684987
1232	1.886		0.686327
1233	1.895		0.687668
1234	1.896		0.689008
1235	1.9		0.690349
1236	1.902		0.691689
1237	1.903		0.693029
1238	1.91		0.69437
1239	1.916		0.69571
1240	1.921		0.697051
1241	1.924		0.698391
1242	1.925		0.699732
1243	1.925		0.701072
1244	1.93		0.702413
1245	1.936		0.703753
1246	1.937		0.705094
1247	1.939		0.706434
1248	1.939		0.707775
1249	1.942		0.709115
1250	1.945		0.710456
1251	1.951		0.711796
1252	1.952		0.713137
1253	1.956		0.714477
1254	1.963		0.715818
1255	1.964		0.717158
1256	1.965		0.718499
1257	1.972		0.719839
1258	1.975		0.72118
1259	1.976		0.72252
1260	1.976		0.723861
1261	1.979		0.725201
1262	1.982		0.726542
1263	1.992		0.727882
1264	1.995		0.729223
1265	2.001		0.730563
1266	2.003		0.731903
1267	2.004		0.733244
1268	2.006		0.734584
1269	2.009		0.735925
1270	2.01		0.737265
1271	2.016		0.738606
1272	2.022		0.739946
1273	2.029		0.741287
1274	2.032		0.742627
1275	2.035		0.743968
1276	2.038		0.745308
1277	2.042		0.746649
1278	2.045		0.747989
1279	2.046		0.74933
1280	2.052		0.75067
1281	2.065		0.752011
1282	2.081		0.753351
1283	2.083		0.754692
1284	2.086		0.756032
1285	2.087		0.757373
1286	2.094		0.758713
1287	2.124		0.760054
1288	2.129		0.761394
1289	2.13		0.762735
1290	2.134		0.764075
1291	2.14		0.765416
1292	2.144		0.766756
1293	2.147		0.768097
1294	2.148		0.769437
1295	2.15		0.770777
1296	2.155		0.772118
1297	2.156		0.773458
1298	2.156		0.774799
1299	2.16		0.776139
1300	2.166		0.77748
1301	2.17		0.77882
1302	2.172		0.780161
1303	2.172		0.781501
1304	2.18		0.782842
1305	2.183		0.784182
1306	2.183		0.785523
1307	2.202		0.786863
1308	2.215		0.788204
1309	2.22		0.789544
1310	2.231		0.790885
1311	2.237		0.792225
1312	2.239		0.793566
1313	2.239		0.794906
1314	2.252		0.796247
1315	2.252		0.797587
1316	2.255		0.798928
1317	2.256		0.800268
1318	2.257		0.801609
1319	2.262		0.802949
1320	2.263		0.80429
1321	2.269		0.80563
1322	2.281		0.806971
1323	2.284		0.808311
1324	2.284		0.809651
1325	2.293		0.810992
1326	2.297		0.812332
1327	2.303		0.813673
1328	2.321		0.815013
1329	2.321		0.816354
1330	2.322		0.817694
1331	2.326		0.819035
1332	2.327		0.820375
1333	2.343		0.821716
1334	2.349		0.823056
1335	2.356		0.824397
1336	2.359		0.825737
1337	2.371		0.827078
1338	2.376		0.828418
1339	2.397		0.829759
1340	2.398		0.831099
1341	2.401		0.83244
1342	2.404		0.83378
1343	2.405		0.835121
1344	2.414		0.836461
1345	2.421		0.837802
1346	2.434		0.839142
1347	2.44		0.840483
1348	2.443		0.841823
1349	2.46		0.843164
1350	2.465		0.844504
1351	2.482		0.845845
1352	2.487		0.847185
1353	2.508		0.848525
1354	2.514		0.849866
1355	2.519		0.851206
1356	2.527		0.852547
1357	2.545		0.853887
1358	2.545		0.855228
1359	2.548		0.856568
1360	2.562		0.857909
1361	2.566		0.859249
1362	2.57		0.86059
1363	2.584		0.86193
1364	2.59		0.863271
1365	2.605		0.864611
1366	2.614		0.865952
1367	2.624		0.867292
1368	2.629		0.868633
1369	2.649		0.869973
1370	2.66		0.871314
1371	2.66		0.872654
1372	2.66		0.873995
1373	2.663		0.875335
1374	2.672		0.876676
1375	2.679		0.878016
1376	2.684		0.879357
1377	2.697		0.880697
1378	2.707		0.882038
1379	2.726		0.883378
1380	2.729		0.884718
1381	2.74		0.886059
1382	2.74		0.887399
1383	2.741		0.88874
1384	2.742		0.89008
1385	2.748		0.891421
1386	2.767		0.892761
1387	2.775		0.894102
1388	2.788		0.895442
1389	2.826		0.896783
1390	2.833		0.898123
1391	2.84		0.899464
1392	2.845		0.900804
1393	2.85		0.902145
1394	2.857		0.903485
1395	2.883		0.904826
1396	2.886		0.906166
1397	2.894		0.907507
1398	2.918		0.908847
1399	2.922		0.910188
1400	2.923		0.911528
1401	2.929		0.912869
1402	2.953		0.914209
1403	2.959		0.91555
1404	2.983		0.91689
1405	2.992		0.918231
1406	3.063		0.919571
1407	3.075		0.920912
1408	3.077		0.922252
1409	3.078		0.923592
1410	3.084		0.924933
1411	3.093		0.926273
1412	3.093		0.927614
1413	3.098		0.928954
1414	3.12		0.930295
1415	3.149		0.931635
1416	3.175		0.932976
1417	3.192		0.934316
1418	3.204		0.935657
1419	3.209		0.936997
1420	3.23		0.938338
1421	3.234		0.939678
1422	3.251		0.941019
1423	3.254		0.942359
1424	3.3		0.9437
1425	3.323		0.94504
1426	3.334		0.946381
1427	3.363		0.947721
1428	3.375		0.949062
1429	3.387		0.950402
1430	3.4		0.951743
1431	3.427		0.953083
1432	3.43		0.954424
1433	3.44		0.955764
1434	3.445		0.957105
1435	3.483		0.958445
1436	3.494		0.959786
1437	3.502		0.961126
1438	3.516		0.962466
1439	3.571		0.963807
1440	3.588		0.965147
1441	3.612		0.966488
1442	3.668		0.967828
1443	3.726		0.969169
1444	3.861		0.970509
1445	3.888		0.97185
1446	3.89		0.97319
1447	3.962		0.974531
1448	3.978		0.975871
1449	4.061		0.977212
1450	4.134		0.978552
1451	4.244		0.979893
1452	4.295		0.981233
1453	4.387		0.982574
1454	4.389		0.983914
1455	4.675		0.985255
1456	4.782		0.986595
1457	4.844		0.987936
1458	4.922		0.989276
1459	4.959		0.990617
1460	5.258		0.991957
1461	5.291		0.993298
1462	5.323		0.994638
1463	5.693		0.995979
1464	5.794		0.997319
1465	6.932		0.99866
1466	7.359		1

## Sheet: f. mitochondrial coverage
		1	2	3	4	5	6	7	8	9	10	11	12	13	14	15	16	17	18	19	20	21	22	23	24	25	26	27	28	29	30	31	32	33	34	35	36
	cKO fed	7.13059	8.1207	5.15235	4.68973	7.48277	9.19481	6.26298	8.39426	9.04629	5.53928	11.8589	10.1161	12.282	8.85966	10.2036	11.8614	9.70162	4.87951	6.54047	10.466	9.56926	9.01088	8.15355	9.22185	2.8852	4.87524	10.5138	0.856462*	8.73382	10.3702	13.6335	8.86102	7.27647
	cKO fasted	3.19783	11.8196	8.75781	7.27735	8.8691	10.4607	9.98704	6.83657	4.88572	7.12144	4.29945	10.9682	12.3865	4.13322	14.516	7.27763	2.114829*	8.79796	6.47722	3.52817	8.57115	9.02906	3.00967	6.89839	8.2277	7.26788	3.98811	5.19562	4.23913	7.74279	4.49706	12.1226	5.81811	4.78645	5.08051	10.7764

## Sheet: g. beta oxidation
2.5 mM glucose
	Time (minutes)	Control BSA						Control-BSA+Eto						Control-PAL:BSA						Control-Pal:bsa +eto						cko bsa							cko bsa+eto							cko pal:bsa							cko pal:bsa +eto
		1	2	3	4			1	2	3	4			1	2	3	4			1	2	3	4			1	2	3	4	5	6		1	2	3	4	5	6		1	2	3	4	5	6		1	2	3
	1.31667	25.0079	28.3119	24.7323	28.0402			24.4302	21.989	26.271	25.5817			57.7652	52.3935	63.6898	41.6082			29.8249	30.9352	27.9918	30.9435			26.7169	25.6503	27.208	28.5716	29.1969	27.9906		24.0806	30.4977	26.1703	23.9646	26.4839	25.393		30.5217	31.3774	34.7958	39.8509	37.5374	45.1792		27.3118	29.0182	29.6478
	7.98333	25.0079	28.3119	24.7323	28.0402			24.4302	21.989	26.271	25.5817			57.7652	52.3935	63.6898	41.6082			29.8249	30.9352	27.9918	30.9435			27.3497	26.4149	27.3656	29.3547	30.2902	28.1143		25.1192	31.1022	27.2661	24.1505	25.772	25.1029		30.8367	33.111	34.4664	41.3801	39.5691	44.3957		27.1381	29.4302	25.6482
	14.5833	26.2547	29.2288	24.7849	27.742			24.4837	20.17	25.3611	24.6722			53.9835	48.3781	62.8438	40.6768			28.3764	29.399	27.5506	29.1768			26.1581	24.2868	26.039	27.3213	27.9508	26.6869		23.6204	28.6153	24.8864	22.6163	23.2819	23.5657		27.3637	30.9984	31.7392	39.2609	35.6779	42.1973		25.9718	28.1035	26.2277
	21.2167	14.0962	19.2415	16.3453	17.6724			14.2873	13.631	14.8759	12.3885			30.4424	27.8714	31.6983	32.6456			17.3972	17.5291	16.7206	17.3823			16.8245	12.0604	16.4773	19.0478	20.2287	17.7145		15.0781	20.6028	16.5284	14.1476	15.2325	15.6741		16.071	18.0944	20.9457	25.5691	26.2732	26.9211		14.7369	16.4806	15.9643
	28.1167	15.7881	20.3124	17.8035	18.9628			15.1646	14.5078	16.8694	15.5703			29.622	28.2092	30.2406	31.6962			18.695	18.2284	15.7243	16.7512			19.8688	11.8161	18.793	21.2462	22.2772	19.8944		16.0653	22.8886	17.5143	14.8627	17.0652	16.2662		16.2196	19.4979	20.7876	25.8972	23.0775	27.0565		17.1077	18.3212	15.4183
	34.75	15.6977	18.5499	17.7269	18.3465			14.8915	13.0135	15.348	15.0811			28.8839	26.0655	29.3021	30.6001			17.5618	17.3232	16.4171	16.0492			18.5519	11.6861	18.0419	20.1613	19.8601	19.0196		15.1959	21.8436	16.8498	15.5877	16.4289	16.4679		15.9881	18.3591	19.9858	23.3163	20.8149	25.6278		14.6327	17.567	14.823
	41.3833	44.6274	48.7791	43.395	46.882			44.3405	41.3579	45.7423	39.9884			80.1818	80.908	71.6943	80.8109			52.4386	54.8627	50.2379	50.2372			49.4447	46.5212	48.5724	52.0393	52.6004	50.4778		44.2822	55.1218	47.4153	41.13	42.4717	42.5668		48.6524	54.6	56.477	74.3763	63.8451	72.5996		48.3133	51.4679	52.5856
	48.2667	42.4573	50.4655	43.3745	46.4222			39.8963	37.0737	45.2676	41.8826			79.2978	78.7025	66.6914	79.4824			48.594	53.2116	47.9562	51.8498			47.7227	39.9793	45.2433	50.3485	51.9766	48.5723		42.139	50.4069	43.7773	42.8808	41.8799	40.9036		48.6905	54.1574	55.4633	71.3446	63.3297	71.0708		44.1401	48.2153	44.1042
	54.8833	40.9521	43.4556	41.9895	45.1354			41.214	34.5314	42.3785	37.7389			75.2185	77.0755	66.3975	77.986			48.9741	51.4894	44.0825	46.9037			46.0306	35.4231	43.8743	48.4659	46.7776	46.7034		40.9286	50.1281	42.0602	37.5295	41.2828	40.7616		45.1619	53.0408	54.4173	68.4062	59.1855	70.1179		43.0203	47.6739	45.331
	61.5167	23.6934	27.8499	25.5477	25.7944			23.9855	22.7846	25.2148	22.9571			35.0441	33.0247	33.3856	34.9269			26.7968	27.2119	25.1568	25.7204			27.6321	21.4523	26.8812	29.4941	28.7464	28.6289		24.9104	30.9732	26.2104	26.0894	25.2469	25.9398		23.6156	27.301	25.8569	29.8414	27.3516	31.3455		25.7687	27.1199	26.8532
	68.4	20.3131	24.1664	21.262	22.0974			20.2204	19.7938	21.0594	19.2035			30.4731	28.6706	29.3576	31.501			22.7391	23.6529	21.8163	21.6885			23.3986	16.4715	23.5823	25.5176	26.2227	24.1084		21.0546	26.8869	23.4176	20.7234	21.4301	20.992		20.3347	21.8679	22.6984	26.9416	23.8794	27.3859		21.8866	22.8586	20.4753
	75.0333	20.5872	25.1517	18.5019	19.3427			17.0488	18.0652	18.2515	18.0658			28.1012	25.0064	25.5706	27.72			19.0128	18.6619	18.2936	18.1536			20.4886	12.853	21.2047	22.9898	23.2492	21.9905		19.1475	25.6627	20.3255	20.2089	17.804	18.506		18.553	19.8172	19.9175	23.598	23.5985	25.2604		18.6056	20.6494	17.984
[truncated: 3 more columns]

## Sheet: h. quantification
2.5 mM glucose
	control					cKO
	BSA	BSA Eto	BSA:palm	BSA:Palm+Eto		BSA	BSA Eto	BSA:palm	BSA:Palm+Eto
1	22.0917	12.8224	32.3148	16.7924		27.2441	21.3953	27.1669	23.2713
2	15.0984	10.6879	33.2214	18.1463		24.1697	24.9987	32.0649	26.2605
3	13.5701	14.3932	26.5383	16.3874		22.3143	21	22.7541	26.865
4	15.1195	13.1139	32.1301	17.6903		24.7669	19.79	29	28.8918
5						24.2288	20.4481	38.2407	36.4436
6						24.4761	20.419	33.8769	35.7345

## Sheet: i. beta oxidation
0.5 mM glucose
	Time (minutes)	Control-0.5 MM GLU +BSA					Control-BSA+Eto					Control-Pal					Control-Pal+Eto					cKO-0.5MM GLU+BSA						cKO-BSA+Eto							cKO-Pal-BSA						cKO-Pal+Eto
		1	2	3	4		1	2	3	4		1	2	3	4		1	2	3	4		1	2	3	4	5		1	2	3	4	5	6		1	2	3	4	5		1	2	3	4	5	6
	1.31667	16.9814	19.6991	25.9242	16.8318		13.757	23.4334	23.2733	27.5408		60.9894	63.1227	54.3978	63.4575		37.4602	57.1256	46.0896	61.3342		35.0797	32.6963	34.6154	25.4927	29.9236		25.4394	48.2845	30.8688	30.9228	33.4797	18.0836		32.4059	35.7372	68.9801	67.9971	54.9199		57.2096	39.0662	23.1546	30.0384	27.6127	59.8966
	7.95	18.5614	16.4316	25.3722	13.9093		14.189	24.0267	21.6639	23.9229		59.6154	61.3224	56.2219	62.2376		36.8806	53.1417	47.7699	63.4844		33.4908	32.3548	34.8929	27.391	29.7452		19.2431	49.1167	24.2803	22.2449	28.9113	18.822		32.4118	33.6822	64.9398	63.5832	56.523		48.8341	35.2506	31.2761	26.391	25.6142	60.9478
	14.5833	18.2398	18.3794	22.6747	12.6965		14.9086	19.2769	19.2214	18.0629		56.6446	58.0572	54.8116	62.5446		29.0752	48.3379	45.8601	62.7795		35.2159	32.1422	34.6931	26.2001	32.3615		20.0291	43.6692	20.4526	23.7196	33.4766	17.3227		36.1073	35.1662	62.5008	59.5563	54.7364		47.9163	34.4481	27.4904	25.4259	23.1855	62.8254
	21.2167	15.5032	9.71636	23.1197	8.38298		7.23612	13.2168	14.5127	13.6191		35.1713	13.273	18.5823	22.4263		19.8239	22.7277	19.9119	23.4323		22.7844	22.4617	23.3817	17.3664	21.1692		15.0091	36.0602	19.3214	16.6611	20.5919	11.7364		18.3396	18.0601	30.1746	26.0581	24.1242		21.3252	21.5603	19.885	18.8288	15.9693	34.891
	28.0833	10.667	10.5904	18.1567	8.13847		10.0595	13.1957	15.194	10.1188		29.2533	8.60187	21.751	22.7582		19.343	23.2616	14.1448	20.6164		22.2736	20.0476	23.9432	16.1908	19.1267		18.1695	35.3678	18.322	15.3965	14.6503	8.80788		14.8954	17.9959	34.2351	30.9187	26.491		21.938	22.7322	19.09	19.2106	10.5627	36.7483
	34.7167	8.3666	6.82767	16.0782	8.55344		5.76315	12.1571	13.5124	10.2279		27.2577	11.0733	13.8344	16.1233		14.7448	19.1917	12.9062	21.8039		20.6562	18.6646	21.4661	14.0879	16.7479		15.2119	31.8765	15.1015	11.7047	16.2906	11.015		11.6026	13.9931	33.0668	23.2316	20.9211		21.5736	15.0279	17.0862	13.964	12.1993	36.1001
	41.35	24.0265	21.8248	39.7804	29.0367		35.8044	27.2229	35.264	25.8841		119.897	75.9997	89.8985	105.606		31.7814	45.318	25.0684	49.2312		53.9292	50.6311	50.4484	36.5843	48.2284		20.5523	66.3293	34.3244	23.1392	33.9809	22.4953		36.3155	31.3814	58.6875	49.4982	46.8927		33.9118	38.8344	23.8341	24.3543	26.1917	69.374
	48.2167	26.6191	20.921	40.6874	28.4662		30.5444	30.3668	31.6522	21.0525		104.932	75.8176	80.7717	96.0486		35.2133	45.4132	28.0554	43.9405		52.5367	53.7962	54.8892	37.2565	46.4953		18.5856	70.6085	35.8794	31.5972	33.8056	19.3356		36.712	32.2184	56.5095	42.4723	42.5889		41.1373	41.2372	28.0562	24.9308	18.9791	79.3911
	54.8167	29.7144	20.6595	38.1526	22.0527		29.4581	31.6991	30.1352	22.3934		92.237	68.7583	79.2916	88.8857		31.0172	39.8352	30.5327	41.2541		56.1127	55.6673	51.5485	39.1758	46.4755		25.5027	71.531	34.1943	28.4339	36.47	20.1235		32.654	31.5794	63.6319	44.0171	40.6629		36.3726	41.0214	26.5671	23.3717	29.1538	75.2597
	61.45	13.7097	13.4119	29.0529	19.418		17.3185	23.0112	17.5783	15.8198		29.8659	27.0697	19.1091	23.292		19.2386	20.9967	20.7277	17.1277		28.0864	24.9056	29.6326	19.2069	26.3688		14.828	42.6697	16.0316	19.5714	14.3456	10.3377		20.2303	31.768	24.5441	17.7554	21.7872		25.8002	24.3877	17.5903	11.2129	13.6483	39.401
	68.3167	13.8451	12.4185	20.8327	15.3143		15.6812	23.8739	15.7786	19.7687		25.7337	26.9379	17.2593	19.0909		18.0417	20.8973	19.4233	16.8152		25.6111	21.261	27.4616	16.9255	22.18		13.304	39.7131	20.7843	11.5371	17.0114	9.65319		13.2883	22.0949	27.6953	26.1207	18.6608		19.0554	23.5968	16.6516	10.8239	11.1505	44.8156
	74.95	14.0418	13.516	16.3202	12.7226		14.7618	21.9565	15.8344	16.9146		28.8292	22.1424	15.5686	15.2475		16.2669	20.8552	15.1623	13.3887		23.9013	20.7602	27.7869	18.188	22.7039		13.0219	37.7782	16.4725	12.0975	19.377	13.4469		15.7689	27.8738	26.5514	17.6989	21.0459		19.2253	16.2123	18.6757	12.0632	17.3498	37.9494

## Sheet: j. quantification
	Control					cKO
	BSA	BSA Eto	BSA:palm	BSA:Palm+Eto		BSA	BSA Eto	BSA:palm	BSA:Palm+Eto
1	12.7449	16.2545	79.955	14.6289		31.1448	5.54321	17.9758	12.5866
2	8.71664	5.88905	46.5873	22.6249		28.1694	30.2691	13.3213	17.2741
3	18.7074	16.5719	66.0613	8.46217		27.0667	15.003	28.5129	3.94918
4	11.2042	3.34135	77.756	27.9934		19.2179	6.47805	23.4401	5.52546
5						17.0592	13.389	22.7684	10.2225
6							10.7588		34.483
