# Supplementary material for: Drp1 is required for AgRP neuronal activity and feeding
Source: eLife. 2021 Mar 9;10:e64351. doi: 10.7554/eLife.64351 (PMC7946429; doi:10.7554/eLife.64351)
Supplement: Figure 4—source data 1. [file elife-64351-fig4-data1.xlsx]

## Sheet: g. %Fos-positive AgRP neurons
	Bregma -1.46 mm													Bregma -1.70 mm													Bregma -2.06 mm													total
	Control-Fasted						Drp1 cKO-Fasted							Control-Fasted						Drp1 cKO-Fasted							Control-Fasted						Drp1 cKO-Fasted							Control-Fasted						Drp1 cKO-Fasted
	1	2	3	4	5	6	1	2	3	4	5	6		1	2	3	4	5	6	1	2	3	4	5	6		1	2	3	4	5	6	1	2	3	4	5	6		1	2	3	4	5	6	1	2	3	4
	44.6043	48.2823	36.5792	40.3846	33.14		28.2451	24.8378	10.3406	26.9718				42.2648	42.9147	36.5792	36.5079	23.3349	40.2284	28.7199	26.0895	32.8941	10.4928	27.2224			38.6667	34.6154	31.7837	39.8757	22.1239	51.4991	35.0292	20.1791		12.0624	19.1682			41.9501	45.5985	35.279	39.161	27.0148	45.8637	31.8745	24.8379	28.8659	10.9653
[truncated: 2 more columns]

## Sheet: h. # AgRP neurons in ARC
	Bregma -1.46 mm													Bregma -1.70 mm													Bregma -2.06 mm													total
	Control-Fasted						Drp1 cKO-Fasted							Control-Fasted						Drp1 cKO-Fasted							Control-Fasted						Drp1 cKO-Fasted							Control-Fasted						Drp1 cKO-Fasted
	1	2	3	4	5	6	1	2	3	4	5	6		1	2	3	4	5	6	1	2	3	4	5	6		1	2	3	4	5	6	1	2	3	4	5	6		1	2	3	4	5	6	1	2	3	4
	139	176	129	115	122			145	149	145	151			152	156	121	126	130	169	163	156	152	142	157			150	164	130	134	113	165	157	152		141	142			147	166	126.667	111.667	121.667	167	160	151	150.5	142.667
[truncated: 2 more columns]

## Sheet: fasting food intake
		DRP1+/+;AgRPCreERT2													DRP1fl/fl;AgRPCreERT2
		1	2	3	4	5	6	7	8	9	10	11			1	2	3	4	5	6	7	8	9	10	11
	1	0.6	0.9	0.9	1.2	1.3	1.2	1.6	2.1	0.6	1.2	0.4			1.1	0.6	0.8	0.7	0.6	1	0.9	0.7	0.3	1.3	0.7
	2	0.9	1.1	1.2	1.2	1.9	1.6	1.8	2.8	0.8	1.6	0.7			1.4	1	0.9	1	1.2	1.3	0.9	0.9	0.4	1.5	0.8
	4	1.3	1.2	1.6	1.9	2.6	2.4	2.4	3.8	1.6	2.1	1.1			1.4	1.7	1.1	1.4	1.7	1.7	1.6	0.9	0.9	2.1	1.3
	8	2.5	2.1	2.6	2.9	3.8	3.6	4.1	6	2.6	3.5	2.3			2.4	2.1	1.8	2.1	2.6	2.6	2.4	1.9	1.8	4.1	2.1
	24	5.8	7.1	6.1	6.3	7.4	6.6	6.4	8.3	5.4	6.1	4.8			5.8	4.9	4.5	5.3	6.6	5.7	5.4	3.3	3.9	6.2	5.1
