# Supplementary material for: Drp1 is required for AgRP neuronal activity and feeding
Source: eLife. 2021 Mar 9;10:e64351. doi: 10.7554/eLife.64351 (PMC7946429; doi:10.7554/eLife.64351)
Supplement: Figure 5—figure supplement 1—source data 1. [file elife-64351-fig5-figsupp1-data1.xlsx]

## Sheet: g. %Fos positive POMC neurons
	Control-fed					Drp1 cKO-fed
	1	2	3	4		1	2	3	4
	23.0974	18.3736	24.2417	22.963		37.6491	27.9282	34.5949	34.5588

## Sheet: h. #of POMC neurons in ARC
		Control-fed					Drp1 cKO-fed
		1	2	3	4		1	2	3	4
		149	120	148	136		135.667	132.333	130	135

## Sheet: k relative intensity of MSH
	WT-Fasted					Drp1 cKO-Fasted
	0.944885	0.789306	1.4795	0.786303		7.68402	6.85207	6.14025	5.01996	5.27646

## Sheet: l. particle number of MSH
	WT-Fasted					Drp1 cKO-Fasted
	149.5	126.5	191	163.5		415.5	390.5	453	366	342

## Sheet: o. # Fos-positive cells in PVN
		Control-Fasted						Drp1 cKO-Fasted
		12	21	34	24			62	43	95	83	80
