# Supplementary material for: Drp1 is required for AgRP neuronal activity and feeding
Source: eLife. 2021 Mar 9;10:e64351. doi: 10.7554/eLife.64351 (PMC7946429; doi:10.7554/eLife.64351)
Supplement: Figure 5—figure supplement 2—source data 1. [file elife-64351-fig5-figsupp2-data1.xlsx]

## Sheet: a. relative Dnm1l mRNA
		Drp1+/+; AgRPCreERT2-Fasted						Drp1fl/fl; AgRPCreERT2-Fasted
	Input	2.05701	0.683536	1.18577	0.802302	0.88647		1.00268	1.13871	1.06853	0.699993	0.999568
	IP	6.16044	4.95209	5.52332	3.26512	2.5393		0.991841	0.932574	0.961751	1.44404	2.47605

## Sheet: b. relative Agrp mRNA
			Drp1+/+; AgRPCreERT2-Fasted						Drp1fl/fl; AgRPCreERT2-Fasted
		Input	1.0364	1.88923	1.39928	0.357942	2.01335		0.191026	1.51389	0.537765	0.946087	7.46422
		IP	35.6217	39.0508	37.2969	37.3231	36.0097		47.5526	45.8695	46.7035	10.4156	27.4914

## Sheet: c. relative Pomc mRNA
		Drp1+/+; AgRPCreERT2-Fasted						Drp1fl/fl; AgRPCreERT2-Fasted
	Input	1.25209	1.15366	1.20186	1.12579	0.830779		0.933558	1.2045	1.59707	1.70335	1.83093
	IP	1.01624	0.815856	0.910554	0.915771	0.425191		0.917578	1.27259	1.24069	1.09026	2.34978
