# Supplementary material for: Drp1 is required for AgRP neuronal activity and feeding
Source: eLife. 2021 Mar 9;10:e64351. doi: 10.7554/eLife.64351 (PMC7946429; doi:10.7554/eLife.64351)
Supplement: Figure 5—source data 1. [file elife-64351-fig5-data1.xlsx]

## Sheet: c. relative intensity of AgRP
bregma -0.7 mm
		Control-Fasted								DRP1KOAgRP-Fasted
		1	2	3	4					1	2	3	4
		1.17739	1.21794	0.736539	0.868131					0.691762	0.37229	0.378359	0.306458

## Sheet: d. particle number of AgRP
bregma -0.7 mm
			Control-Fasted								DRP1KOAgRP-Fasted
			1	2	3	4					1	2	3	4
			942	953.5	821.5	824					781	699	604.5	607.5

## Sheet: g. relative intensity of AgRP
bregma -0.82 mm
			Control-Fasted								DRP1KOAgRP-Fasted
			1	2	3	4					1	2	3	4
			1.03507	1.08441	0.977754	0.902766					0.373442	0.258954	0.265905	0.374431

## Sheet: h. particle number of AgRP
bregma -0.82 mm
			Control-Fasted								DRP1KOAgRP-Fasted
			1	2	3	4					1	2	3	4
			854	913	876	955					807	799	748	756.5

## Sheet: k. relative intensity of AgRP
bregma -0.94 mm
			Control-Fasted								DRP1KOAgRP-Fasted
			1	2	3	4					1	2	3	4
			1.27877	0.925054	0.729453	1.06672					0.601602	0.824162	0.49771	0.603851

## Sheet: l. particle number of AgRP
bregma -0.94 mm
			Control-Fasted								DRP1KOAgRP-Fasted
			1	2	3	4					1	2	3	4
			955.5	1040.5	944	922.5					835	883	796	771.5

## Sheet: o. relative intensity of AgRP
bregma -1.06 mm
			Control-Fasted								DRP1KOAgRP-Fasted
			1	2	3	4					1	2	3	4
			1.31724	0.872763	1.0749	0.735092					0.665242	0.604609	0.498311	0.488416

## Sheet: p. particle number of AgRP
bregma -1.06 mm
			Control-Fasted								DRP1KOAgRP-Fasted
			1	2	3	4					1	2	3	4
			957	996	1002	961					843.5	887.5	799	864
