# Supplementary material for: Drp1 is required for AgRP neuronal activity and feeding
Source: eLife. 2021 Mar 9;10:e64351. doi: 10.7554/eLife.64351 (PMC7946429; doi:10.7554/eLife.64351)
Supplement: Figure 6—figure supplement 1—source data 1. [file elife-64351-fig6-figsupp1-data1.xlsx]

## Sheet: a. body weight
		DRP1+/+; AgRPCreERT2-TMX																					DRP1fl/fl; AgRPCreERT2-TMX
		1	2	3	4	5	6	7	8	9	10	11	12	13	14	15	16	17	18	19			1	2	3	4	5	6	7	8	9	10	11	12	13	14	15	16	17	18	19	20	21	22
	5	15.8	14.3	15	15	14.9	19.1	16.3	16	18.2	17.3	15.6	18	17.7	14.1	17.2	17.6	17	14	14.5			16.2	14.7	14.4	14.9	16.2	14.8	16	12.9	12.8	9.9	16.2	15.8	15.9	16.2	16.8	18.1	16.1	21.3	18.7	20.1	18.7	15.2
	6	16.2	15.2	15.9	17	15.9	20.2	18.3	18	18.9	18.1	16.4	18.9	19.1	15.6	18.1	18.3	17.9	14.8	14.9			17.1	16.2	16.7	15.5	17.3	15.9	16.9	14.4	13.9	12.5	17.1	16.4	16.4	16.9	17.3	18.8	16.8	22.1	19.2	21.4	19.2	16.1
	7	16.7	15.8	16.2	18.2	16.6	20.8	19.1	18.7	19.6	19	17	19.2	20.2	16.2	19	18.9	18.5	15.2	15.3			18.6	18	18.1	15.7	19.3	17.1	17.8	15.8	15.2	14.7	17.7	16.9	17	17.4	17.8	19.7	17.3	22.9	19.6	22.2	19.7	16.9
	8	16.8	16.1	16.8	19.1	17.2	21.5	20.3	19.2	20	19.8	17.5	19.5	21.1	16.7	19.5	19.3	19	15.4	15.5			19.1	18.4	18.5	15.9	19.1	17.4	18.8	16.6	16.1	15.5	18.3	17.3	17.5	17.7	18.1	20.5	17.7	23.4	20	23	20.3	17.9
	9	17	16.4	17.3	19.1	17.8	21.9	20.9	19.9	20.2	19.9	18.3	20.7	22.1	17.2	20.1	20	19.4	16.8	16.1			19.7	18.8	19	17.4	19.5	17.5	18.4	17.4	16.3	15.9	18.4	17.4	17.6	17.7	18.3	20.7	18.2	23.6	20.2	23.1	20.7	18.2
	10	17.9	16.7	18.3	19	18	22.6	21.2	20.3	20.1	20.1	19.1	21.6	23.3	17.6	20.9	20.8	19.9	17.2	16.5			19.6	18.5	19.1	17.9	20	17.5	18.8	17.6	16.5	15.8	18.5	17.5	17.7	17.8	18.6	21.1	18.6	24	20.6	23.2	21.2	18.4
	11	17.5	16.5	18.7	18.9	18.2	23.2	21.4	21.2	20.3	20.2	20	22.8	24	17.9	21.5	21.6	20.5	17.9	16.9			20.2	18.7	18.4	18.3	20.2	17.4	19.2	17.9	16.7	15.7	18.6	17.7	17.9	17.8	18.8	21.4	19.2	24.5	20.9	23.2	21.7	18.5
	12	17.8	17	18.7	20.2	18.7	24.3	22	21.1	20.4	20.3	20.8	23.9	24.6	18.1	22.1	22.4	20.8	18.1	17.2			20.2	18.6	18.7	17.6	20.2	17.3	19.1	18.9	17.8	17	18.7	17.8	18.1	17.8	19.2	21.7	19.7	24.9	21.2	23.2	22.2	18.8
	13	18.3	17.7	19.4	20.1	18.5	24.5	22.4	21.3	20.6	20.6	21.2	24.7	25.3	18.5	22.9	22.9	21.2	18.4	17.9			20.1	18.7	18.7	18.8	20.3	17.8	19.8	18.7	18.2	17.1	18.8	18.2	18.3	17.8	19.2	21.9	20.1	25.3	21.6	23.1	22.8	19.1
	14	18.6	18.3	19.5	20	18.3	24.7	22.8	21.4	21	20.7	21.9	25.4	26.4	18.8	23.3	23.3	21.8	18.9	18.2			21.3	19.4	18.7	18.3	20.5	18.6	20.2	18.6	18.4	17.3	19.2	18.6	18.5	17.7	19.3	22	20.3	25.8	22	23.3	23.4	19.4
	15	19.6	18.5	19.8	20	18.3	24.7	22.8	22	21.4	21	22.5	26.2	27.1	19.1	23.7	23.4	22	19.1	18.6			21.3	19.4	18.7	18.2	20.8	18.8	20.2	18.6	18.4	17.3	19.5	18.8	18.7	17.7	19.4	22.2	20.5	26	22.3	23.4	23.7	19.7
	16	20.5	18.9	20.1	20.3	17.8	26.8	25.9	22.5	21.6	21.3	22.9	27	27.8	19.3	24	23.5	22.2	19.3	18.8			21.4	19.2	18.6	18.3	21.1	18.9	20.3	18.3	17.4	18	19.8	19.1	19	17.7	19.5	22.4	20.8	26.3	22.6	23.6	24	20.1
	17	21.3	19.1	20.3	20.2	18.6	27	25.6	23.1	22.1	21.6	23.2	27.6	28.2	20	24.5	23.7	22.5	19.6	19.2			21.5	18.6	18.7	18.5	21.8	19	20.4	18.6	18	18.3	20	19.2	19.2	17.9	19.5	22.3	20.9	26.5	22.9	23.7	24.2	20.2
	18	22	19.4	20.5	21	19	26.9	25.4	23	22.6	21.9	23.5	27.9	28.6	20.3	24.9	24	22.9	19.9	19.9			21.6	19.5	18.7	18.6	22.1	20.4	20.8	18.6	18.4	18.7	20.2	19.5	19.5	18	19.4	22.5	21.1	26.6	23.1	23.9	24.3	20.4
	19	22.4	19.7	21	21.3	19.1	27	25.6	24	22.8	22.3	24	28.1	28.7	20.6	25.2	24.1	23.2	20.3	20.1			21.4	18.9	18.6	18.7	22.2	20.2	21.2	20.2	19.9	19.2	20.3	19.7	19.6	18.1	19.5	22.7	21.3	26.9	23.2	24.2	24.2	20.6
	20	22.8	20	21.2	21.9	19.5	27.1	25.6	24.4	23.1	22.8	24.4	28.4	29	21.1	26.2	24.5	23.8	20.7	20.4			21.5	19	18.7	18.9	22.4	20.3	21.5	20.4	20.3	19.6	20.5	20	19.9	18	19.6	22.7	21.5	26.8	23.3	24.5	24.5	20.9

## Sheet: b. fat mass
		CTL												DRP1KOAgRP
		1	2	3	4	5	6	7	8	9	10	11		1	2	3	4	5	6	7	8	9	10
	5	2.18	2.62	1.94	2.33	3.28	1.91	2.04	2.45	2.21	1.36	1.36		1.58	1.84	1.93	2.12	2.08	2.42	2.3	2.18	2.35	1.54
	8	2.59	3.32	2.37	2.8	3.45	2.03	2.58	2.52	2.13	1.91	1.39		1.77	2.16	2.15	2.48	2.46	3.19	2.95	2.44	2.73	1.69
	12	3.1	2.53	4.16	4.93	5.17	2.19	3.01	3.86	2.98	2.49	1.94		1.79	1.97	2.02	2.32	2.67	3.78	3.69	3.12	3.65	2.07
	16	3.4	3.02	6.04	7.82	7.41	2.34	3.96	5.29	4.1	3.54	2.35		2.75	3.04	2.35	2.04	3.01	3.91	3.62	3.85	4.78	2.32
	20	3.91	3.58	7.12	8.15	8.87	2.87	4.93	6.38	4.97	4.02	2.96		3.05	3.23	2.88	2.32	3.49	4.32	3.74	3.74	4.96	2.87

## Sheet: c. lean mass
	CTL												DRP1KOAgRP
	1	2	3	4	5	6	7	8	9	10	11		1	2	3	4	5	6	7	8	9	10
	13.26	12.89	11.49	13.07	14.62	11.16	13.74	13.67	12.99	11.05	11.64		12.52	12.12	12.68	12.98	13.61	12.4	16.35	14.79	14.96	12.11
	15.06	14.7	13.65	14.7	16.57	13.19	15.99	15.19	15.34	12.45	12.41		14.64	13.39	13.4	14.03	16.01	12.96	17.47	15.41	15.84	14.23
	14.87	15.6	14.12	15.69	16.98	13.81	16.73	15.45	15.62	13.18	13.2		14.59	13.99	13.6	14.13	15.84	14.02	17.96	15.62	16.32	14.29
	15.76	16.32	14.4	16.76	17.53	14.45	17.53	15.86	15.8	13.52	14.2		15.05	13.69	13.79	14.31	15.45	14.71	18.34	15.93	16.98	14.59
	16.54	16.98	14.84	17.38	18.21	15.25	18.12	16.54	16.03	14.31	14.59		15.72	14.18	14.01	14.67	15.59	14.84	18.12	15.87	16.74	14.88

## Sheet: d. food intake
		control														Drp1AgRPKO
		1	2	3	4	5	6	7	8	9	10	11	12	13		1	2	3	4	5	6	7	8	9	10	11	12	13	14
	Total	3.3	3.23333	3.76667	3.5	3.43333	3.43333	3.03333	3.5	3.6	3.36667	3.3	4.3	3.3		3.2	3.4	3.03333	3.46667	2.9	3.3	2.6	3.13333	2.43333	1.83333	2.93333	2.86667	3.16667	2.93333
	Light	0.466667	0.733333	0.3	0.433333	0.733333	0.9	0.466667	1.13333	0.466667	0.5	0.6	0.933333	0.6		0.5	0.4	0.4	0.366667	0.533333	0.633333	0.383333	0.666667	0.3	0.833333	0.533333	0.533333	0.633333	0.566667
	Dark	2.83333	3.03333	3.2	2.36667	2.7	2.53333	2.56667	2.36667	3.13333	2.86667	2.7	3.36667	2.7		2.7	3	2.63333	3.1	2.36667	2.66667	2.21667	2.46667	2.43333	1.83333	2.4	2.33333	2.53333	2.36667

## Sheet: e. EE
		control							Drp1 cKO
	time	1	2	3	4	5	6		1	2	3	4	5	6	7	8	9
	0	4.768	4.453	5.721	4.689	5.368	7.048		4.583	4.894	3.853	4.914	6.874	7.472	5.593	6.805	5.52
	0.5	6.57	6.812	4.205	5.7	4.422	5.643		4.627	5.414	5.475	5.3	6.139	4.772	5.771	6.689	5.067
	1	5.158	4.545	5.284	4.846	4.233	5.08		4.496	7.812	4.116	6.373	5.042	4.947	7.659	5.035	6.593
	1.5	4.884	6.161	4.788	4.599	4.384	4.964		4.461	5.873	5.425	5.284	4.753	6.082	5.682	5.059	5.018
	2	4.976	5.024	5.288	5.621	4.278	5.037		4.509	5.388	6.262	6.515	5.061	4.956	5.584	4.759	4.746
	2.5	6.304	6.342	4.339	5.75	4.196	5.86		6.967	4.923	4.638	4.965	6.928	4.798	6.091	6.995	4.968
	3	4.981	4.886	4.249	4.233	4.073	4.843		5.735	5.245	4.238	5.16	5.236	5.945	5.851	6.229	5.466
	3.5	4.479	4.52	4.245	4.483	5.213	6.61		4.728	6.364	4.34	4.944	4.879	4.94	4.93	5.255	5.17
	4	5.044	5.784	5.344	5.138	5.317	5.151		4.79	4.905	4.898	4.914	5.463	4.742	5.178	5.272	5.005
	4.5	5.933	4.711	4.04	4.562	4.435	4.572		5.126	4.925	4.318	4.934	4.511	4.583	5.16	4.994	5.081
	5	5.226	5.05	4.119	5.625	4.165	4.585		4.84	4.938	4.85	4.797	6.53	7.068	5.991	5.39	4.684
	5.5	4.964	6.358	4.243	4.59	4.399	4.549		4.785	6.365	4.268	4.894	6.407	6.232	5.998	4.984	6.847
	6	4.533	4.892	4.664	4.325	5.651	4.693		4.66	5.923	4.243	4.92	5.129	5.239	5.644	4.904	5.325
	6.5	5.6	6.426	4.902	4.649	4.826	5.623		5.785	5.225	4.159	5.163	4.832	4.949	5.292	7.283	4.945
	7	5.029	4.967	3.46	4.688	4.358	4.717		4.821	5.404	4.153	5.905	5.924	4.888	7.14	5.697	4.792
	7.5	4.641	4.869	3.787	4.502	5.352	5.471		4.677	6.406	5.055	6.792	5.298	5.639	5.844	5.36	4.944
	8	4.781	6.399	3.881	4.129	4.197	5.706		4.863	5.354	4.093	5.312	4.711	5.042	6.261	5.122	5.149
	8.5	4.92	5.247	4.175	5.356	4.572	4.644		5.727	7.142	4.362	4.711	4.835	5.484	5.444	5.18	4.985
	9	6.088	5.066	5.643	6.055	5.98	4.627		4.695	5.391	4.368	6.954	4.893	5.568	6.447	6.156	4.586
	9.5	5.362	4.561	5.562	4.845	4.69	7.669		5.024	5.542	4.34	5.597	6.361	4.975	5.876	5.118	4.855
	10	5.038	6.074	3.42	4.524	4.575	5.718		5.232	6.316	5.256	5.326	4.791	4.714	5.18	5.874	4.436
	10.5	5.714	7.083	3.842	4.471	4.453	5.042		4.793	5.112	5.418	6.108	6.3	6.646	7.05	5.566	7.103
	11	5.507	6.184	3.86	6.187	6.007	4.999		5.73	6.319	6.116	5.512	5.168	5.528	5.778	4.885	5.208
	11.5	7.183	6.074	4.685	4.955	6.066	4.811		5.134	6.675	5.948	8.008	5.289	6.386	6.175	6.557	5.888
	12	6.985	5.851	5.905	4.349	4.168	8.044		7.568	7.506	5.369	6.779	6.447	6.783	6.865	5.42	5.267
	12.5	5.481	7.705	5.587	7.444	4.839	6.01		7.438	7.681	5.827	7.162	6.807	7.079	7.846	7.284	7.769
	13	5.762	7.033	4.901	6.879	5.977	7.391		7.209	6.59	5.507	5.919	7.119	6.959	6.037	7.542	11.092
	13.5	5.349	6.994	5.754	5.215	4.867	6.285		7.693	6.959	4.133	5.83	7.009	6.324	7.827	6.936	10.235
	14	5.81	4.923	4.464	4.927	6.257	5.655		7.339	7.298	4.552	6.291	6.985	6.543	7.515	5.776	9.259
	14.5	5.312	5.62	6.137	5.566	5.886	7.062		7.247	7.03	7.338	6.89	7.134	6.266	6.161	6.795	11.897
	15	6.019	6.24	6.343	5.09	5.027	6.039		7.231	6.911	6.969	6.821	7.851	6.524	6.826	6.891	9.228
	15.5	6.304	6.633	4.499	6.818	6.286	6.409		6.768	6.46	6.256	5.902	6.976	7.261	6.494	6.847	12.302
	16	5.314	6.138	4.548	5.066	6.073	5.752		4.541	7.569	4	5.684	7.793	6.547	6.041	5.967	7.97
	16.5	6.159	6.545	4.032	5.193	5.319	7.171		4.58	7.787	4.64	5.92	6.321	7.533	6.931	5.791	8.924
	17	7.632	6.432	6.134	5.135	5.349	6.674		6.497	6.553	5.057	7.686	6.652	5.049	7.264	7.095	7.964
	17.5	6.796	6.876	5.861	5.302	6.848	5.532		6.909	7.159	3.997	6.594	5.923	6.542	6.278	5.621	7.595
	18	6.7	6.263	5.036	5.334	5.929	7		5.691	5.827	4.658	5.982	7.451	5.385	7.261	5.465	5.67
	18.5	5.622	5.809	3.698	7.075	5.378	6.89		4.985	6.213	5.312	5.848	7.278	6.473	6.794	6.096	5.105
	19	5.689	5.659	3.338	6.706	5.078	5.385		4.744	7.95	3.813	5.847	5.711	7.214	6.414	5.873	5.652
	19.5	4.495	5.717	4.055	4.792	5.835	6.985		6.474	6.446	4.207	5.562	6.257	7.77	6.261	6.245	6.055
	20	7.031	5.402	3.544	4.587	5.222	5.797		4.466	6.127	6.168	6.608	5.692	4.586	6.281	6.175	7.191
	20.5	5.852	5.372	5.232	4.608	5.952	7.438		4.362	7.556	3.648	6.386	5.696	6.067	6.752	6.721	7.389
	21	6.249	5.769	5.58	5.127	6.083	6.68		4.625	5.7	4.135	4.777	6.998	6.717	6.518	5.646	6.208
	21.5	5.211	6.199	3.865	8.435	6.309	5.357		7.127	5.736	5.354	5.892	6.133	5.103	6.894	6.609	7.2
	22	4.666	4.42	5.047	6.674	4.44	5.428		5.317	5.86	3.671	6.013	4.979	5.805	7.363	4.98	5.141
	22.5	6.32	5.819	4.376	5.874	5.164	6.725		4.557	7.769	4.221	6.332	6.284	4.11	6.177	5.299	5.043
	23	6.212	6.048	3.605	4.108	5.189	5.585		4.592	5.696	3.973	5.228	6.205	5.344	6.361	5.626	7.389
	23.5	5.666	4.437	3.906	4.935	5.021	6.669		6.649	5.528	3.858	5.146	4.978	4.264	6.867	7.317	5.965
	24	4.954	4.104	4.195	6.847	4.902	5.339		4.713	6.868	3.925	4.622	4.748	5.13	6.358	5.482	7.142
	24.5	4.656	4.705	4.623	5.8	4.89	4.967		4.378	7.098	4.994	7.024	4.455	6.437	4.67	4.781	4.819
	25	4.534	4.477	5.321	4.61	4.59	5.315		4.507	5.525	3.803	6.571	4.54	4.411	5.39	5.872	6.509
	25.5	5.205	6.283	5.561	3.292	4.463	4.772		4.563	5.034	4.196	4.82	4.135	4.294	5.861	4.718	4.849
	26	5.501	4.672	3.357	3.702	4.785	4.857		6.015	5.23	3.711	4.507	4.501	4.278	6.968	5.969	4.584
	26.5	5.119	4.848	3.635	4.331	5.006	5.442		5.509	5.74	4.211	4.991	5.769	4.639	5.568	4.435	4.252
	27	6.565	7.372	5.299	3.7	4.345	4.947		7.73	5.658	7.042	6.624	4.505	3.945	4.847	4.54	4.399
	27.5	5.247	6.072	5.649	3.886	3.956	6.023		5.032	5.093	7.393	5.072	4.282	5.804	4.978	4.444	6.368
	28	4.85	4.79	3.443	4.011	4.156	5.062		4.926	4.913	7.743	5.563	4.489	4.672	5.311	6.326	6.324
	28.5	4.681	6.053	3.544	6.072	5.684	4.935		5.355	5.834	7.539	4.828	5.995	6.52	6.565	6.466	7.212
	29	5.226	4.704	6.045	6.011	4.588	4.688		5.929	5.128	7.178	4.657	7.227	7.839	5.757	5.422	5.136
	29.5	6.681	5.865	4.004	4.64	4.361	4.482		4.444	5.613	5.919	6.694	4.781	6.077	5.267	4.47	4.768
	30	5.201	4.822	3.316	4.81	4.37	6.221		4.769	6.84	4.392	5.446	4.532	4.455	6.212	6.061	4.322
	30.5	5.397	4.801	3.482	4.951	3.923	5.372		5.515	5.442	6.139	4.991	6.252	4.479	5.219	5.148	4.542
	31	4.858	6.243	3.38	4.49	4.941	4.586		6.094	5.376	4.712	5.079	4.755	4.556	5.371	4.748	5.749
	31.5	5.439	4.527	3.545	4.55	5.573	4.659		5.008	4.798	4.608	6.279	4.208	4.449	5.371	4.907	4.581
	32	6.461	4.368	3.57	6.608	4.629	4.623		5.07	5.749	4.509	5.049	5.635	6.896	5.25	5.045	5.656
	32.5	5.203	6.273	3.571	4.761	4.185	5.604		4.464	5.169	7.139	5.167	5.506	4.778	5.18	5.018	4.578
	33	5.176	5.357	3.667	4.802	4.235	4.981		6.659	6.777	7.244	5.925	4.773	5.02	6.722	4.957	4.713
	33.5	5.208	4.716	4.646	5.626	4.758	4.915		4.713	6.081	6.175	5.82	4.834	7.274	5.856	6.674	5.186
	34	5.695	4.973	3.255	4.497	4.648	4.881		4.51	5.602	5.933	5.965	6.611	5.307	5.841	5.306	4.555
	34.5	5.596	6.485	3.615	5.187	4.597	5.103		5.458	6.035	5.604	5.238	6.072	5.471	6.395	5.051	6.631
	35	5.694	5.056	3.759	5.868	6.581	6.943		4.773	5.522	6.999	6.746	4.987	5.212	8.248	7.9	7.906
	35.5	5.468	7.21	5.859	5.055	4.901	5.124		7.022	7.223	6.533	8.39	6.31	6.631	6.717	6.348	5.311
	36	7.462	7.743	4.435	5.805	4.938	5.352		5.279	6.889	7.828	6.867	5.487	5.672	6.058	5.282	5.52
	36.5	7.061	7.366	4.632	6.186	6.511	5.215		5.808	6.835	8.411	6.508	6.222	6.14	6.764	6.674	10.297
	37	6.494	7.103	5.514	8.211	5.836	6.948		7.092	7.383	6.522	6.061	7.349	5.885	5.886	7.728	10.652
	37.5	5.529	5.895	4.098	6.061	4.871	6.631		5.19	6.842	6.533	6.047	6.911	6.479	7.099	6.286	9.313
	38	6.797	6.468	5.72	5.982	5.712	6.007		7.362	6.811	5.358	7.316	7.025	8.097	5.565	5.033	11.233
	38.5	5.192	5.126	5.694	5.53	5.757	5.542		5.751	7.241	7.811	7.007	7.144	5.699	6.131	7.661	9.008
	39	5.636	5.967	3.84	7.448	4.533	6.121		5.699	7.485	7.971	6.206	7.393	6.977	5.863	5.841	9.149
	39.5	6.022	5.345	3.849	5.626	6.118	6.323		4.775	7.279	7.383	5.942	7.633	6.404	7.542	6.413	10.06
	40	5.517	6.743	5.766	6.979	5.789	5.645		6.584	7.066	7.822	6.169	7.68	5.173	6.13	7.568	11.144
	40.5	5.58	4.78	6.456	5.567	6.338	5.426		7.161	7.11	7.276	6.724	7.641	7.766	8.617	7.335	11.326
	41	6.335	5.443	5.099	7.956	5.94	7.249		5.648	6.042	5.44	5.85	6.294	6.294	7.706	6.202	8.396
	41.5	6.618	5	3.765	5.756	4.21	5.464		5.073	7.981	5.364	6.972	5.699	6.914	6.121	5.374	8.709
	42	5.894	5.835	3.441	5.481	5.479	6.803		4.92	7.84	7.52	5.395	6.719	6.001	6.618	7.871	7.649
	42.5	5.09	4.661	3.859	8.51	6.34	7.002		5.25	5.783	7.288	6.172	6.591	6.345	6.622	6.848	5.162
	43	6.177	5.718	5.134	8.348	7.144	6.801		7.278	6.635	5.303	5.944	6.567	6.848	7.435	7.959	7.678
	43.5	5.645	5.548	4.202	6.293	4.634	6.231		5.274	5.997	5.805	6.377	6.832	6.406	6.258	5.636	5.623
	44	4.676	5.841	3.826	4.92	5.207	5.132		4.97	5.699	6.917	5.561	5.777	7.343	5.772	5.003	5.531
	44.5	4.853	4.747	3.846	4.579	5.613	5.351		4.952	5.935	7.08	6.226	5.639	6.736	5.435	5.34	6.249
	45	7.352	5.62	3.865	5.26	5.006	6.278		5.156	6.168	7.125	6.281	5.886	5.369	5.272	7.102	6.492
	45.5	6.799	5.187	3.822	4.467	4.198	5.368		5.022	6.917	5.917	5.782	5.134	5.182	6.774	4.865	6.683
	46	5.347	5.013	5.111	6.248	5.24	5.819		6.442	7.438	4.877	6.301	6.935	6.019	6.569	6.137	5.36
	46.5	5.046	4.981	3.631	5.731	6.253	6.835		4.729	5.905	6.057	5.03	6.746	6.717	7.482	6.156	6.102
	47	5.044	4.7	3.311	5.734	4.987	5.231		4.437	5.721	5.443	5.148	6.032	6.395	5.24	6.617	6.088
	47.5	5.257	6.098	3.333	4.409	5.497	6.762		4.425	5.049	4.757	5.122	5.502	6.449	5.808	6.121	7.233
	48	5.067	4.776	3.228	7.243	4.754	6.411		6.297	7.117	4.872	5.054	5.824	5.319	7.719	8.024	6.547
		15.667	16.577	16.322					14.498	13.863	12.978	13.628
		12.873	15.585	18.459					10.103	9.157	10.849	14.139
		12.638	16.691	16.37					12.509	11.971	9.113	12.578
		12.824	11.183	14.612					10.077	8.533	10.752	10.332
		12.692	14.23	14.807					9.676	9.265	9.619	10.66
		12.807	14.003	12.329					12.817	14.176	9.24	10.668
		12.209	12.011	13.055					10.566	11.687	12.239	14.271
		12.907	12.922	13.005					9.991	8.798	9.978	13.722
		11.327	12.455	13.651					9.22	9.026	12.535	12.265

## Sheet: f. EE kcal
			control							Drp1 cKO
		Total	272.712	273.436	216.506	263.099	248.839	278.707		266.563	302.641	265.588	284.265	287.298	283.523	303.027	288.175	318.594
		Light	132.895	135.377	107.116	118.314	114.138	125.751		128.039	141.865	130.553	139.197	127.628	130.084	140.77	132.628	128.237
		Dark	139.816	138.059	109.389	144.785	134.701	152.955		138.524	160.776	135.036	145.069	159.671	153.439	162.257	155.547	190.357

## Sheet: g. EE kcal per day
		Control							Drp1 cKO
		1	2	3	4	5	6		1	2	3	4	5	6	7	8	9
	15.76	272.712
	16.32		273.436
	16.76			216.506
	14.45				263.099
	17.53					248.839
	15.8						278.707
	15.05								266.563
	13.69									302.641
	14.79										265.588
	13.78											284.265
	14.31												287.298
	15.45													283.523
	18.34														303.027
	15.93															288.175
	16.98																318.594

## Sheet: h. locomotor activity
		control							Drp1 cKO
	Total	28581.5	24598.5	23449.5	27289	24960	28711		49555	31654.5	39652	29556	50294	29202	37671	90508
	Light	10673.5	11420.5	6633	6867	8033.5	5085		14430	11294.5	17411	14436.5	9107	9268.5	12582	10291
	Dark	17908	13178	16816.5	20422	16926	23626		35125	20360	22241	15119.5	41187	19933	25089	80217

## Sheet: i. vO2
	Control	Drp1 cKO
1	1150.22	1126.59
2	1141.75	1261.85
3	918.845	1113.44
4	1094.35	1179.37
5	1048.83	1206.6
6	1187.41	1180.02
7		1269.85
8		1203.48
9		1333.99

## Sheet: j. vCO2
	Control	Drp1 cKO
1	985.32	955.062
2	1029.14	1145.77
3	762	983.66
4	1005.36	1096.98
5	901.567	1056.35
6	964.794	1080.81
7		1124.34
8		1084
9		1185.93

[truncated: 1 more sheets: k. RER]
