# Supplementary material for: Drp1 is required for AgRP neuronal activity and feeding
Source: eLife. 2021 Mar 9;10:e64351. doi: 10.7554/eLife.64351 (PMC7946429; doi:10.7554/eLife.64351)
Supplement: Figure 6—figure supplement 2—source data 1. [file elife-64351-fig6-figsupp2-data1.xlsx]

## Sheet: c. BAT temperature
	Control										Drp1 CKO
	34.3	33.3	32.7	34.2	33.3	33.7	32.9	32.7			33.6	34.3	35.1	35.7	34.3	36.1	35.2	36

## Sheet: d. rectal temperature male
male
	Control										Drp1 CKO
	37.2667	36.8333	36.8667	35.3667	37.1667	37.1333	36.2333	36.3667			37.8333	37.3	37.1333	36.9333	37.3667	37.2	37.3333

## Sheet: e. rectal temperature female
female
		Control										Drp1 CKO
	36.7333	36.7333	37.0333	36.1333	35.9333	36.4	36.9667	37.2333	36.7			36.8667	37.0667	37.2333	37	37.5333	37.3667	37.2
