# Supplementary material for: Drp1 is required for AgRP neuronal activity and feeding
Source: eLife. 2021 Mar 9;10:e64351. doi: 10.7554/eLife.64351 (PMC7946429; doi:10.7554/eLife.64351)
Supplement: Figure 6—source data 1. [file elife-64351-fig6-data1.xlsx]

## Sheet: a. body weight
		DRP1+/+; AgRPCreERT2-TMX																				DRP1fl/fl; AgRPCreERT2-TMX																			DRP1fl/fl; AgRPCreERT2-Corn oil
		1	2	3	4	5	6	7	8	9	10	11	12	13	14	15	16	17	18			1	2	3	4	5	6	7	8	9	10	11	12	13	14	15	16	17			1	2	3	4	5	6	7	8	9
	5	17.6	16.3	17.2	14.7	19.8	18.1	17.3	19.5	18.3	18.6	19.8	21.1	21.1	17.5	18.6	20.5	18.9	18.7			18	17.8	17.2	15	17.2	17.4	15.3	16.2	15.8	17.3	19.7	20.3	21.3	21.2	17.8	20.1	21.4			19.5	18.6	19.1	18.8	19.6	17.8	17.4	17.7	20.5
	6	19.4	17.3	17.2	14.7	21	19.2	18.8	21.3	19.7	19.6	21.2	22.5	22.7	18.6	19.8	21.9	19.6	19.8			18.7	19.2	17.1	15.9	17.6	18	15.3	17.1	16.4	19.1	20.8	21.3	22.7	22.6	18.2	21.3	22.3			21.1	20.1	20.4	21.3	21.2	18.9	18.6	18.9	21.9
	7	21.5	18.7	17.3	15.9	22.2	22.6	21	22	21.5	20.9	22	23.4	23.1	19.9	20.7	22.7	21.4	21.1			19.4	21.6	16.9	16.2	17.5	17.7	15.8	19.4	16.5	20.2	20.9	21.5	23.1	23.1	19.7	21.4	23.5			22.4	21.2	21.8	23.5	22.7	19.8	19.9	20	23
	8	21.5	20.3	17.1	16.7	22.2	23	22	22.9	22.4	21.7	22.2	24.3	23.9	21.2	21.9	23.4	23.2	23.2			20.2	22.1	16.8	16.6	17.2	17.4	15.9	19.5	18.1	21.5	21.2	21.4	23.7	23.8	20	22.8	23.6			23.3	22.6	22.4	23.9	23.6	20.3	20.4	21.1	23.8
	9	21.6	22.5	18	17.9	23.8	24.4	22.7	24	23.5	22.8	22.3	25.1	24.4	22.3	22.6	24.2	24.8	24.2			20.8	22.8	17.2	18	17.9	17.7	16.6	20.3	19.5	21.2	21.5	22	23.6	24.5	20.2	23.2	23.8			24.3	23.9	23.2	24.5	24.4	20.8	20.9	21.9	24.4
	10	21.7	23	18.9	18.7	24.7	24.7	24.2	24.8	24	23.5	22.5	25.7	25	23.8	23.2	25.3	25.6	25.1			20.7	24.1	17.9	19.8	19.3	19.1	17.2	20.4	20.4	21.8	21.8	22.7	23.8	25.2	20.7	23.8	24.1			26	24.6	24.8	25.2	24.8	21.4	21.7	22.8	24.8
	11	22.3	22.3	20.1	20.2	25	26.5	24.7	25.3	24.3	23.9	22.7	26.1	25.6	24.5	23.5	25.9	25.9	25.7			20.9	24.2	18.8	19.7	20.5	19.3	18	20.5	20.7	22.3	22	23.4	24.2	25.8	21.1	24.2	24.2			26.8	25.3	25.3	26.1	25	21.9	21.8	23	25.1
	12	22.1	23.5	20.9	20.4	25.5	26.3	24.9	25.2	24.6	24.1	23	26	25.7	25.3	23.5	25.8	26.5	26.3			21.9	24.3	19.4	20.5	21.9	20.2	18.9	20.9	20.8	23	21.9	23.5	22	25.5	21.5	24.5	24.3			27.3	26.1	26	26.8	25.8	22.5	22.7	23.3	25.9
	13	22.6	24.1	22.3	20.5	26	27.3	26.3	25.3	24.7	24.4	23.4	26.2	25.6	26.7	23.6	26	27.3	27.1			22.5	25.3	19.5	21	22.8	20.9	20.6	21.6	20.5	23.1	21.9	23.6	20.8	25.1	21.7	24.7	24.3			27.4	26.5	26.2	27	26.5	22.7	23.1	23.3	26.7
	14	23.6	25.7	22.6	20.8	26.3	27.4	26.9	25.4	25.1	24.7	24.1	26.7	27.1	28.6	24.6	26.4	28.4	28.1			23.4	27	19.6	20.7	23.1	22.5	21.8	22.2	21.8	23.2	23.2	23.6	21.3	25.4	22.3	25.3	25.5			27.8	26.9	26.5	27.5	26.9	22.8	23.3	23.6	27.3
	15	23.9	25.7	23.2	21	26.2	27.1	26.5	25.6	25.4	24.8	24.8	26.7	28.4	29	25.3	27	28.9	29			23.6	28	19.6	21.2	24.5	23.2	21.5	21.9	21.9	23.7	23.3	23.9	23.6	26.1	22.8	26.2	27.2			28.5	27.1	26.9	27.6	27.3	23.5	23.9	24.1	27.6
	16	25.6	27	23.7	21.7	26	26.9	26.1	25.4	25.8	24.9	25.3	26.6	28.9	29.2	25.7	27.3	29.5	29.3			24.5	28.1	19.5	21.5	25.4	24.1	22.3	21.5	22	24.2	23.5	24.5	25.7	26.8	23.1	26.1	27.4			28.2	27.3	27.2	28	27.6	24.1	24.6	24.5	27.9
	17	26	28	24.5	22.3	26.5	27.2	26.7	25.6	26.2	25.3	25.8	27.1	29.3	29.9	25.9	28.6	29.4	29.8			25.1	28.4	19.4	21.2	26.6	24.8	22.1	22.4	22.1	24.9	23.7	24.4	25.2	26.3	23.8	26.4	27.8			28.6	27.7	27.8	28.3	28.1	25	25.1	25.2	28.4
	18	26.6	28	24.3	22.4	26.8	27.5	26.9	25.8	26.6	25.8	25.4	27.6	29.8	30.7	25.9	29.5	29.6	30.3			25.2	29.1	19.8	21.8	26.2	24.7	23	22.9	22.3	25.6	23.2	23.9	25.8	27.9	24.5	26.7	28.2			29.1	28.1	28.3	28.8	28.3	25.7	25.6	25.7	28.8
	19	26.7	28.1	24.5	22.8	27.1	27.9	27.1	25.9	26.9	26.2	24.8	26.9	30.2	30.9	25.9	30.1	30.1	30.9			25	28.8	20.3	22	26	24.8	23.5	23.2	22.5	26.3	22.7	25.5	26.4	28.4	24.9	26.8	28.6			29.1	28.4	28.7	29.1	28.7	25.8	25.9	26.1	29.3
	20	26.7	28.2	24.7	23.5	27.3	28.3	27.3	26	27.1	26.5	24.2	27.1	32.9	30.5	25.9	29.6	30.6	31.2			25.3	28.3	21	22.4	26.1	24.9	23.5	23.3	23	27	23.1	26.4	27.2	29	25.3	27	29.2			29.4	28.7	29	29.4	29.1	26.3	26.2	26.5	29.9
[truncated: 1 more columns]

## Sheet: b. fat mass
			DRP1+/+; AgRPCreERT2-TMX																									DRP1fl/fl; AgRPCreERT2-TMX
			1	2	3	4	5	6	7	8	9	10	11	12	13	14	15	16	17	18	19	20						1	2	3	4	5	6	7	8	9	10	11	12	13	14	15	16	17	18	19	20	21	22
	5	5	2.17	1.86	1.65	2.11	2.01	2.07	1.72	1.98	1.78	1.8	1.85	2.36	2.16	2.13	1.98	2.21	1.94	1.87	1.53	1.54						1.98	1.94	1.97	1.71	1.89	1.99	2.02	1.61	1.68	1.96	1.99	2.12	2.16	2.12	1.51	1.48	1.47	1.79	1.86	1.24	1.78	1.14
	8	8	2.2	3.45	1.77	3.1	2.81	3.06	2.48	2.87	2.23	2.18	2.66	3.21	2.96	2.89	2.64	3.82	2.61	2.76	2.92	3.1						1.91	2.68	2.31	1.82	2.42	2.55	2.76	1.64	1.74	2.78	2.21	2.95	2.42	2.21	2.42	2.92	1.43	2.58	3.07	3.09	2.68	2.75
	12	12	2.32	3.63	2.84	3.05	2.94	3.16	3.71	2.97	3.19	3.24	3.11	3.93	3.79	3.75	3.16	4.13	3.72	4.06	3.72	3.24						2.32	3.01	2.39	1.95	2.76	2.65	2.89	2.13	2.08	2.9	2.34	3.79	3.28	3.17	3.06	4.29	2	2.87	3.42	2.7	3.56	2.58
	16	16	2.87	3.99	3.05	3.23	3.07	3.48	3.89	4.03	3.73	3.67	3.39	4.02	4.01	3.8	3.34	4.86	4.36	4.14	4.65	3.47						2.8	3.19	2.63	2.45	3.63	2.96	3.07	2.34	2.42	3.28	2.5	4.02	3.44	3.34	3.59	4.63	3.61	3.03	3.67	3.43	3.69	2.28
	20	20	3.43	4.31	3.45	3.67	3.16	3.69	3.92	4.46	4.21	3.93	3.62	4.34	4.49	3.83	3.67	5.02	5.14	4.46	4.98	3.86						3.11	3.32	2.89	2.76	3.69	3.01	3.12	2.69	2.89	3.57	2.64	4.12	3.61	3.27	3.81	4.31	3.94	3.39	3.65	3.48	3.79	2.45

## Sheet: c. lean mass
			DRP1+/+; AgRPCreERT2-TMX																									DRP1fl/fl; AgRPCreERT2-TMX
			1	2	3	4	5	6	7	8	9	10	11	12	13	14	15	16	17	18	19	20						1	2	3	4	5	6	7	8	9	10	11	12	13	14	15	16	17	18	19	20	21	22
		5	13.75	12.81	13.06	11.65	15.02	14.41	13.73	15.19	14.28	14.81	14.97	16.79	13.68	14.61	16.12	17.32	16.94	14.95	14.15	15.86						13.74	14.48	13.51	12.98	13.31	13.63	12.84	14.02	13.98	15.23	14.86	15.59	17.61	17.48	13.11	13.95	14.21	13.39	14.11	14.72	12.86	12.13
		8	16.44	16.37	15.62	14.7	16.92	16.84	16.48	16.96	16.62	15.61	15.63	17.83	21.18	15.84	17.12	17.09	19.79	20.34	17.65	20.17						15.42	18.08	14.46	14.76	15.35	14.6	15.12	15.12	15.07	18.68	16.43	16.17	18.22	18.54	16.67	18.14	19.66	15.62	17.46	18.64	16.22	15.69
		12	17.24	16.85	16.85	15.05	18	18.52	17.82	17.98	18.01	18.96	16.49	19.26	23.63	16.22	18.14	17.49	20.05	20.84	18.37	21.06						16.83	19.17	15.95	16.01	17.35	16.06	15.79	15.86	15.73	21.82	17.54	17.38	19.7	19.67	17.78	18.47	21.95	17.08	18.95	19.05	16.41	16.02
		16	19.61	18.55	17.36	16.04	18.85	19.18	18.61	18.92	18.83	19.69	17.38	20.32	24.02	17.16	19.59	18.96	23.04	22.58	20	21.52						18.32	21.36	16.59	16.87	18.52	18.58	17.09	16.24	16.35	22.87	17.72	17.68	20.23	20.61	19.97	18.31	23.1	17.86	19.43	19.79	17.09	15.47
		20	21.04	20.39	19.01	17.21	19.79	20.09	19.53	19.62	19.78	20.03	19.14	20.97	25.15	22.64	20.31	19.68	24.93	24.11	21.34	21.96						19.01	22.48	17.68	17.42	19.89	20.07	18.45	17.56	17.16	23.71	19.23	19.17	20.92	21.2	21.14	20.94	25.37	19.64	20.13	20.67	18.12	16.31

## Sheet: d. accumulative food intake
		Control																Drp1 cKO
		1	2	3	4	5	6	7	8	9	10	11	12	13	14			1	2	3	4	5	6	7	8	9	10	11	12	13	14	15	16	17	18
	0	0	0	0	0	0	0	0	0	0	0	0	0	0	0			0	0	0	0	0	0	0	0	0	0	0	0	0	0	0	0	0	0
	0.5	0	0	0	0	0.14	0.02	0	0.2	0	0.01	0	0.06	0.05	0			0	0	0	0.01	0	0	0	0	0	0	0.07	0.02	0	0	0.03	0.18	0	0
	1	0	0	0	0	0.14	0.02	0	0.2	0.02	0.01	0	0.09	0.05	0			0	0	0	0.01	0	0	0	0	0	0	0.07	0.02	0	0	0.03	0.18	0	0
	1.5	0	0.07	0	0	0.14	0.02	0	0.2	0.32	0.07	0	0.1	0.1	0			0	0	0	0.01	0	0.03	0	0	0	0	0.07	0.05	0	0	0.03	0.18	0	0
	2	0	0.07	0	0	0.33	0.02	0	0.2	0.32	0.11	0.26	0.15	0.14	0			0	0	0	0.01	0.15	0.03	0	0	0	0	0.12	0.25	0	0	0.03	0.18	0	0
	2.5	0	0.07	0	0	0.33	0.02	0	0.5	0.32	0.11	0.26	0.27	0.14	0.1			0.02	0	0	0.02	0.15	0.03	0	0.03	0	0	0.12	0.36	0	0	0.27	0.18	0	0.1
	3	0.21	0.28	0	0	0.33	0.02	0	0.5	0.32	0.41	0.46	0.34	0.27	0.15			0.02	0	0	0.02	0.15	0.04	0.19	0.03	0.03	0	0.23	0.36	0.07	0.01	0.27	0.18	0	0.1
	3.5	0.28	0.28	0	0	0.33	0.02	0	0.5	0.34	0.56	0.5	0.34	0.37	0.16			0.09	0	0	0.02	0.19	0.34	0.19	0.03	0.03	0	0.57	0.36	0.45	0.02	0.27	0.18	0	0.1
	4	0.28	0.28	0	0	0.54	0.14	0	0.5	0.65	0.56	0.64	0.49	0.44	0.16			0.09	0	0	0.17	0.19	0.34	0.19	0.03	0.03	0	0.57	0.4	0.45	0.02	0.27	0.18	0	0.1
	4.5	0.28	0.31	0.08	0	0.54	0.14	0.08	0.5	0.65	0.62	0.64	0.49	0.44	0.17			0.09	0	0.35	0.18	0.36	0.34	0.19	0.03	0.03	0	0.67	0.53	0.45	0.02	0.27	0.28	0	0.15
	5	0.28	0.31	0.08	0	0.54	0.14	0.08	0.5	0.65	0.79	0.64	0.65	0.65	0.56			0.26	0	0.35	0.18	0.36	0.34	0.19	0.19	0.03	0.06	0.81	0.57	0.45	0.02	0.27	0.28	0	0.19
	5.5	0.4	0.31	0.2	0	0.54	0.14	0.11	0.78	0.65	0.79	1.07	0.65	0.65	0.56			0.57	0.11	0.35	0.2	0.37	0.34	0.19	0.35	0.03	0.12	0.81	0.57	0.45	0.02	0.27	0.28	0	0.19
	6	0.69	0.31	0.2	0.17	0.54	0.14	0.12	0.78	0.65	0.79	1.12	0.65	0.88	0.56			0.57	0.11	0.35	0.2	0.48	0.34	0.19	0.35	0.03	0.39	0.81	0.86	0.45	0.02	0.27	0.28	0	0.19
	6.5	0.7	0.31	0.2	0.17	0.54	0.17	0.12	0.78	0.8	0.79	1.12	0.65	0.88	0.56			0.57	0.11	0.35	0.28	0.56	0.43	0.19	0.35	0.03	0.39	0.81	0.95	0.45	0.2	0.39	0.28	0.04	0.32
	7	0.7	0.31	0.24	0.17	0.54	0.17	0.12	0.78	0.97	0.79	1.12	0.78	0.88	0.56			0.6	0.11	0.43	0.28	0.66	0.43	0.19	0.35	0.03	0.48	0.93	0.95	0.45	0.2	0.58	0.48	0.04	0.37
	7.5	0.76	0.52	0.54	0.17	0.54	0.17	0.12	0.78	0.97	0.98	1.21	0.78	1.06	0.56			0.6	0.11	0.44	0.31	0.81	0.43	0.19	0.53	0.03	0.73	0.93	0.95	0.45	0.2	0.58	0.48	0.04	0.37
	8	0.76	0.53	0.54	0.8	0.54	0.17	0.25	0.89	0.97	0.98	1.21	0.78	1.06	0.56			0.6	0.11	0.44	0.31	1.24	0.56	0.23	0.53	0.03	0.76	0.93	0.98	0.45	0.2	0.58	0.48	0.04	0.37
	8.5	1.36	0.53	0.63	1.11	0.54	0.17	0.25	0.89	1.19	1.05	1.39	0.95	1.36	0.71			0.75	0.2	0.44	0.31	1.28	0.56	0.23	0.53	0.03	0.76	1.17	1.03	0.45	0.2	0.58	0.48	0.13	0.45
	9	1.36	0.53	0.63	1.15	0.54	0.23	0.25	0.89	1.19	1.23	1.46	0.95	1.58	0.71			0.75	0.2	0.44	0.31	1.28	0.62	0.29	0.53	0.03	0.87	1.17	1.19	0.66	0.35	0.58	0.48	0.3	0.46
	9.5	1.36	0.6	0.66	1.19	0.54	0.58	0.25	0.89	1.42	1.23	1.46	1.11	1.58	0.71			0.75	0.2	0.51	0.31	1.28	0.79	0.29	0.53	0.03	0.94	1.2	1.26	0.76	0.47	0.58	0.7	0.3	0.6
	10	1.36	0.6	0.76	1.22	0.54	0.58	0.37	1.13	1.56	1.23	1.6	1.11	1.7	0.9			1	0.27	0.53	0.72	1.3	1.24	0.29	0.53	0.03	0.94	1.28	1.37	0.76	0.47	0.58	0.7	0.3	0.6
	10.5	1.36	1.04	0.84	1.36	0.54	0.58	0.55	1.13	1.56	1.59	1.63	1.27	1.76	0.99			1	0.49	0.66	0.72	1.64	1.24	0.5	0.59	0.55	0.94	1.41	1.63	0.76	0.47	0.88	0.7	0.43	0.73
	11	1.59	1.1	0.96	1.43	0.54	0.58	0.55	1.13	1.66	1.59	1.71	1.27	1.88	0.99			1.15	0.49	0.88	0.72	1.64	1.39	0.89	0.59	0.55	1.16	1.57	1.63	0.92	0.59	0.88	0.7	0.43	0.73
	11.5	1.74	1.17	1.16	1.51	0.54	0.65	0.55	1.28	1.89	1.59	1.84	1.27	2.11	1.29			1.15	0.64	0.9	0.72	1.64	1.44	0.89	0.73	0.55	1.16	1.57	1.84	0.94	0.83	1.14	0.88	0.43	0.8
	12	1.84	1.17	1.24	1.68	0.66	0.65	0.67	1.28	1.89	1.59	1.87	1.38	2.27	1.29			1.15	0.69	0.98	0.77	1.67	1.52	0.89	0.75	0.55	1.38	1.89	1.96	0.96	0.83	1.14	0.88	0.67	0.93
	12.5	1.96	1.35	1.24	1.87	0.66	0.81	0.67	1.28	2.03	2.01	2.29	1.66	2.39	1.56			1.32	0.69	1.21	0.77	1.69	1.64	0.89	0.83	1.05	1.38	1.89	2.32	1.14	0.83	1.32	1.09	0.83	1.03
	13	1.96	1.66	1.43	2.2	0.75	0.81	0.97	1.28	2.28	2.19	2.3	1.82	2.39	1.65			1.32	0.69	1.55	0.77	1.81	1.76	0.91	1.11	1.05	1.58	2.15	2.32	1.41	0.83	1.34	1.42	0.92	1.23
	13.5	1.99	1.77	1.65	2.21	1.04	1.07	1.08	1.63	2.43	2.25	2.53	1.9	2.45	2.09			1.69	0.82	1.56	0.8	1.83	1.94	1.04	1.32	1.06	1.94	2.62	2.32	1.49	0.88	1.34	1.53	1.09	1.3
	14	2.29	2.25	1.69	2.21	1.17	1.13	1.13	1.72	2.72	2.68	2.69	2	2.7	2.09			1.69	0.88	1.9	0.83	1.96	2.06	1.35	1.54	1.49	1.94	2.62	2.38	1.68	1.01	1.55	1.75	1.09	1.3
	14.5	2.43	2.33	2.02	2.21	1.56	1.44	1.19	1.96	2.76	2.88	2.96	2.16	2.75	2.17			1.95	0.95	2.08	0.91	2.13	2.14	1.43	1.58	1.55	2.08	2.81	2.42	1.98	1.2	1.79	1.75	1.28	1.41
	15	2.43	2.48	2.02	2.5	1.56	1.58	1.51	2.45	3.01	2.88	3.09	2.36	2.96	2.17			1.95	1.06	2.08	1.13	2.33	2.24	1.53	1.58	1.55	2.17	2.81	2.5	1.98	1.39	1.86	2	1.58	1.68
	15.5	2.53	2.56	2.31	2.63	1.86	1.63	1.51	2.45	3.15	3.12	3.23	2.38	3.03	2.48			2.09	1.07	2.08	1.13	2.53	2.37	1.64	1.91	1.89	2.34	2.82	2.5	2.14	1.6	1.86	2.09	1.64	1.68
	16	2.53	2.67	2.31	3	2.31	1.9	1.89	2.78	3.15	3.12	3.41	2.48	3.18	2.48			2.09	1.27	2.08	1.3	2.79	2.49	1.78	1.94	1.92	2.51	2.93	2.52	2.21	1.7	2.19	2.37	1.73	1.98
	16.5	2.89	2.67	2.55	3	2.31	2.04	1.89	2.78	3.31	3.12	3.65	2.62	3.29	2.48			2.09	1.34	2.08	1.3	2.79	2.66	1.78	2.29	1.92	2.51	2.93	2.52	2.44	1.98	2.21	2.56	1.96	2.12
	17	3.14	3.11	2.55	3	2.64	2.39	1.89	3.41	3.37	3.59	3.74	2.83	3.3	2.92			2.56	1.46	2.08	1.33	2.99	2.66	2.1	2.37	2.28	2.78	3.11	2.52	2.44	2.12	2.33	2.75	2.11	2.12
	17.5	3.14	3.27	2.88	3	2.64	2.39	2.4	3.42	3.86	3.59	3.9	2.83	3.45	2.98			2.69	1.63	2.42	1.36	2.99	2.81	2.15	2.37	2.49	2.85	3.23	2.61	2.75	2.31	2.79	2.75	2.17	2.43
	18	3.14	3.27	2.88	3	2.75	2.51	2.4	3.42	3.86	3.59	4.06	3.18	3.6	2.98			2.9	1.73	3	1.36	3.41	2.91	2.15	2.37	2.49	2.85	3.23	2.61	2.76	2.39	2.79	2.87	2.29	2.43
	18.5	3.14	3.27	2.88	3.01	3.46	2.66	2.4	3.42	3.86	3.87	4.33	3.18	3.78	2.98			2.95	1.87	3	1.36	3.57	2.91	2.58	2.37	2.49	2.94	3.44	2.61	2.76	2.6	2.79	3.03	2.67	2.77
	19	3.14	3.38	3.06	3.14	3.46	2.76	2.4	3.75	4.07	4.6	4.38	3.29	3.84	2.98			2.95	1.9	3	1.75	3.66	2.91	2.58	2.37	3.11	3.1	3.71	2.61	3.09	2.72	3.16	3.23	2.72	2.77
	19.5	3.56	3.38	3.17	3.14	3.46	3.26	2.74	3.87	4.07	4.6	4.38	3.42	3.96	2.98			3.14	1.9	3	1.75	3.66	2.91	2.58	2.37	3.23	3.11	3.82	3.03	3.09	2.84	3.16	3.24	2.72	2.78
	20	3.62	3.45	3.17	3.14	3.49	3.26	2.87	3.87	4.18	4.6	4.49	3.42	4.13	2.98			3.34	1.9	3.05	1.75	4.21	3.11	2.7	2.56	3.23	3.16	3.95	3.03	3.09	2.84	3.16	3.45	2.95	2.78
	20.5	3.97	3.46	3.41	3.14	3.49	3.26	3.3	4.1	4.41	4.6	4.51	3.63	4.24	2.98			3.38	2.06	3.05	1.82	4.21	3.29	3.2	2.56	3.23	3.43	3.95	3.03	3.09	2.84	3.16	3.47	3.06	2.99
	21	3.97	3.82	3.43	3.49	3.77	3.26	3.3	4.1	4.48	4.6	4.63	3.63	4.28	2.98			3.4	2.09	3.28	1.83	4.21	3.29	3.2	2.56	3.23	3.43	4.3	3.03	3.14	2.84	3.54	3.5	3.06	3.34
	21.5	3.97	3.82	3.43	3.83	3.82	3.53	3.3	4.16	4.58	4.6	4.63	3.72	4.28	3.16			3.4	2.09	3.39	1.85	4.21	3.29	3.2	2.64	3.23	3.43	4.3	3.03	3.14	2.91	3.57	3.7	3.19	3.34
	22	3.97	3.82	3.47	3.83	3.82	3.7	3.3	4.27	4.74	4.6	4.9	3.92	4.45	3.17			3.4	2.09	3.54	1.85	4.21	3.29	3.2	2.64	3.4	3.43	4.34	3.03	3.29	3.03	3.79	3.81	3.42	3.34
	22.5	3.97	3.88	3.54	3.83	3.92	3.7	3.3	4.27	4.74	4.79	5.18	3.92	4.51	3.17			3.5	2.09	3.9	1.85	4.45	3.29	3.49	2.72	3.46	3.6	4.59	3.03	3.32	3.11	3.79	3.85	3.44	3.34
	23	3.97	3.88	3.8	3.83	3.92	3.92	3.72	4.52	4.77	4.92	5.18	4.17	4.51	3.45			3.5	2.22	3.9	2.02	4.46	3.29	3.49	3.05	3.46	3.64	4.59	3.03	3.32	3.28	3.79	4.13	3.44	3.63
	23.5	3.97	3.88	3.8	3.83	4.13	4.35	3.72	4.68	4.77	4.92	5.36	4.17	4.51	3.51			3.67	2.22	3.9	2.02	4.46	3.29	3.49	3.05	3.46	3.64	4.63	3.03	3.61	3.28	4.08	4.13	3.6	3.76
	24	3.97	3.88	3.8	3.83	4.3	4.35	3.72	4.68	5.09	4.92	5.41	4.29	4.67	3.51			3.67	2.22	3.9	2.02	4.46	3.29	3.61	3.05	3.46	3.64	4.69	3.03	3.61	3.42	4.1	4.13	3.63	3.76

## Sheet: e. Food intake
		WT																			KO
		1	2	3	4	5	6	7	8	9	10	11	12	13	14		1	2	3	4	5	6	7	8	9	10	11	12	13	14	15	16	17	18
	Total	3.97	3.88	3.8	3.83	4.3	4.35	3.72	4.68	5.09	4.74	4.545	3.92	4.27	3.435		3.67	2.22	3.9	2.02	4.46	3.29	3.61	2.66	3.05	3.46	3.62	3.64	3.49	3.645	3.115	3.79	3.475	3.48
	Light	1.74	1.17	1.16	1.51	0.54	0.65	0.55	1.28	1.89	1.735	1.385	1.425	1.17	1.205		1.15	0.64	0.9	0.72	1.64	1.44	0.89	0.5	0.73	0.55	0.43	1.16	1.35	1.155	0.585	0.875	0.56	0.85
	Dark	2.23	2.71	2.64	2.32	3.76	3.7	3.17	3.4	3.2	3.005	3.16	2.495	3.1	2.23		2.52	1.58	3	1.3	2.82	1.85	2.72	2.16	2.32	2.91	3.19	2.48	2.14	2.49	2.53	2.915	2.915	2.63

## Sheet: f. locomotor activity
		Control																				Drp1 cKO
		1	2	3	4	5	6	7	8	9	10	11	12	13	14							1	2	3	4	5	6	7	8	9	10	11	12	13	14	15	16	17	18
	Total	56694.5	33123.5	29530	61799	28694.5	22398	27563	59638.5	27988	72928	96131.5	55257.5	59370	70602.5							127274	87309.5	157556	93530.5	41806	83532.5	49667.5	45066.5	38772	77834	102354	73315	368294	131762	141978	104638	94402	132126
	Light	5688.5	11534	7970	9842	8930.5	6577	8127.5	17444.5	8211.5	24391.5	29693	19159	21546.5	24813							8833	9821.5	7647	12058.5	15620	8483	11058	16116.5	12094	27302.5	38718	26738.5	106504	48443.5	50036.5	34730	32077	43463
	Dark	51006	21589.5	21560	51957	19764	15821	19435.5	42194	19776.5	48536.5	66438.5	36098.5	37823.5	45789.5							118442	77488	149908	81472	26186	75049.5	38609.5	28950	26678	50531.5	63636.5	46576.5	261790	83319	91941	69907.5	62325	88662.5

## Sheet: g. EE
	time	DRP1+/+-AgRP-cre:ERT2																DRP1fl/fl-AgRP-cre:ERT2
		1	2	3	4	5	6	7	8	9	10	11	12	13	14			1	2	3	4	5	6	7	8	9	10	11	12	13	14	15	16	17	18
	0	4.153	6.233	5.648	3.751	7.75	6.689	6.796	7.176	7.463	4.976	4.133	5.103	7.015	6.908			6.196	7.477	6.092	8.303	8.424	4.186	5.406	5.117	6.485	6.982	7.545	5.748	6.516	8.389	7.764	8.001	6.52	7.235
	0.5	4.689	5.546	5.714	5.223	6.871	6.276	5.956	8.02	7.982	4.469	5.876	5.056	8.209	6.29			5.821	5.637	6.26	5.174	6.77	4.363	5.25	6.681	5.231	4.426	6.082	5.868	4.435	8.066	7.013	8.57	7.91	7.459
	1	4.604	5.088	4.976	3.845	5.349	5.17	7.049	6.087	5.031	7.56	4.388	4.345	5.615	3.91			5.94	5.384	5.778	5.424	6.415	4.42	5.084	6.413	5.625	4.787	6.104	8.98	4.53	6.361	4.995	7.66	6.753	5.992
	1.5	4.198	4.822	5.358	3.658	5.275	4.785	5.741	5.616	5.496	5.113	4.497	5.748	5.015	5.127			6.363	5.942	6.02	5.23	6.287	5.54	7.723	6.333	7.685	7.237	5.987	8.232	4.302	5.827	5.118	5.874	6.773	6.201
	2	4.108	5.956	5.096	5.597	7.843	5.835	5.813	5.398	5.204	5.523	4.482	6.142	6.028	4.619			7.465	4.861	5.595	6.834	8.053	4.025	5.546	5.129	7.129	5.196	8.002	6.059	4.658	5.638	5.049	5.96	8.416	7.062
	2.5	4.739	5.452	5.271	3.711	7.125	4.755	5.761	5.324	6.034	5.438	4.173	5.138	5.594	7.515			5.953	5.256	7.219	5.691	6.467	4.055	5.129	4.972	5.887	5.449	5.531	5.632	6.37	8.415	7.909	5.818	7.297	7.406
	3	5.934	4.265	4.85	3.989	5.984	4.837	5.395	6.639	5.424	5.089	5.622	7.351	5.408	4.822			5.772	5.442	6.391	5.175	5.892	3.904	5.11	5.649	5.678	7.103	5.551	5.841	4.53	6.168	7.17	6.527	6.508	6.037
	3.5	7.43	4.734	4.998	4.625	5.659	4.785	5.851	5.928	6.389	6.923	4.814	4.798	6.253	4.57			5.095	4.743	5.959	5.96	8.148	5.845	7.266	5.71	5.71	5.549	6.337	8.515	4.664	5.523	5.452	5.482	6.596	6.41
	4	5.063	7.259	5.815	4.087	6.299	4.739	6.058	5.606	5.846	5.272	4.427	6.861	5.797	4.628			5.821	5.172	5.561	6.738	6.253	3.924	6.949	5.039	5.701	4.854	7.037	6.298	4.969	6.273	5.235	6.895	6.567	6.033
	4.5	4.385	5.405	5.697	3.426	5.661	4.508	5.826	7.101	5.915	5.679	5.581	6.19	6.627	4.321			5.679	7.172	5.725	7.277	6.803	4.497	5.45	4.856	4.847	4.656	6.265	5.819	5.78	6.414	4.946	6.807	7.678	7.644
	5	4.402	4.846	4.833	3.945	7.593	4.256	5.603	6.103	5.774	5.241	4.636	5.387	6.405	6.69			5.583	5.152	5.847	5.802	5.893	4.242	4.779	7.149	8.065	7.252	6.011	5.65	4.817	5.886	4.945	5.904	6.543	6.531
	5.5	4.421	4.536	5.148	3.753	6.036	4.231	5.55	6.093	5.803	8.278	4.408	5.883	6.844	4.764			7.499	5.385	5.761	5.758	7.009	4.116	4.875	5.477	7.614	5.637	6.199	6.882	4.612	5.947	5.008	5.648	6.506	5.999
	6	7.475	5.011	6.924	6.701	5.339	4.58	5.526	5.965	5.556	6.514	4.42	4.745	6.869	5.196			6.13	5.211	6.672	6.96	8.06	4.007	7.373	5.528	5.933	5.351	5.715	7.199	4.948	5.604	8.736	5.812	8.604	6.191
	6.5	5.609	5.758	4.79	4.96	5.323	6.307	6.087	5.517	4.84	5.83	4.649	5.038	6.03	4.825			6.064	6.734	6.882	5.033	6.139	5.642	5.063	5.228	5.701	5.637	5.619	6.355	4.612	8.586	5.853	6.881	6.928	8.168
	7	4.612	4.78	4.91	3.687	5.824	4.473	6.149	4.434	5.71	5.646	4.071	7.038	5.953	4.389			5.382	7.344	5.833	5.19	6.107	4.094	4.853	6.22	5.36	5.397	5.964	5.134	4.637	8.023	5.165	7.745	6.683	6.532
	7.5	6.453	4.777	7.143	4.453	5.767	4.619	5.297	5.522	5.915	7.959	5.937	4.937	6.63	5.305			5.686	5.217	5.882	5.371	7.76	4.401	6.753	6.369	5.575	5.307	5.78	7.378	4.243	5.932	5.503	6.324	6.211	6.209
	8	5.015	6.192	4.938	4.498	7.165	7.172	6.111	5.788	7.588	5.457	4.657	4.737	7.72	4.84			7.091	5.111	5.68	7.46	6.59	6.037	4.965	5.554	6.048	7.49	7.495	5.262	4.43	6.333	5.42	5.557	6.335	5.777
	8.5	6.601	5.351	5.687	9.955	5.302	4.956	5.572	5.877	5.459	4.998	4.565	6.075	5.761	6.495			6.184	5.14	5.23	6.432	7.291	4.037	5.123	5.417	7.147	5.345	7.206	5.176	6.017	6.197	7.796	5.612	8.282	8.271
	9	7.776	5.039	5.222	10.905	5.577	4.514	5.718	5.987	5.133	6.572	4.558	6.811	6.456	4.677			5.475	6.678	6.285	6.881	5.941	4.675	7.948	5.344	5.608	6.158	5.85	5.254	4.403	7.306	6.145	5.723	6.746	6.462
	9.5	4.905	6.167	5.708	7.476	7.324	4.83	6.263	6.053	5.637	8.138	4.809	4.509	6.136	4.761			5.959	4.964	7.374	5.673	7.479	8.276	7.701	7.409	7.188	5.061	6.226	8.013	4.433	6.038	5.319	8.268	6.425	5.991
	10	4.619	7.605	6.066	6.428	5.652	4.866	5.856	5.942	5.907	6.618	4.158	5.034	6.806	6.324			7.123	5.316	6.119	6.381	8.736	7.194	5.589	6.162	5.673	6.09	6.49	5.685	4.503	6.061	5.237	7.073	7.671	5.906
	10.5	5.454	4.859	5.059	3.973	7.224	7.155	7.08	7.218	7.131	5.296	4.561	5.785	6.325	4.584			6.389	6.675	6.285	5.741	8.326	5.024	6.549	5.973	5.105	5.539	7.068	5.278	8.692	8.075	7.623	5.861	6.412	7.154
	11	4.433	6.615	6.551	4.797	6.748	4.734	5.924	5.302	5.048	8.523	6.624	5.97	7.012	4.788			7.293	5.624	6.115	8.378	7.292	6.75	6.508	6.481	6.859	5.938	6.815	8.304	6.243	6.145	6.579	6.332	6.366	6.374
	11.5	7.808	6.72	5.925	6.056	5.496	4.704	5.35	7.803	6.425	5.985	4.083	5.577	6.871	6.494			6.421	5.676	7.598	6.169	7.253	4.532	5.704	5.468	6.247	5.534	6.173	5.696	4.065	8.923	5.686	7.297	6.689	6.784
	12	5.16	5.344	5.567	9.837	7.925	5.048	7.113	7.343	5.817	5.688	5.528	4.981	7.08	5.5			7.596	6.867	6.999	6.573	6.75	6.193	7.989	6.481	5.633	7.232	7.775	7.064	6.396	7.116	8.085	6.266	7.16	7.532
	12.5	8.419	7.263	8.193	10.716	6.663	5.334	5.655	5.921	5.792	7.961	5.607	7.062	7.22	7.385			13.612	10.842	11.287	9.071	8.461	9.39	8.727	5.764	7.473	6.882	7.868	7.9	5.724	9.182	6.26	7.728	8.695	9.034
	13	12.357	6.786	7.464	9.562	6.042	4.932	7.524	7.173	7.44	8.685	5.791	8.242	7.253	6.774			12.058	13.492	13.006	8.833	8.894	10.382	8.098	6.204	6.724	8.215	8.122	6.733	10.639	8.326	8.61	9.008	8.53	8.925
	13.5	12.578	6.766	8.017	11.466	7.857	6.958	7.873	7.314	8.412	8.765	7.216	6.553	6.51	6.578			13.238	13.829	15.98	6.696	7.806	10.191	8.416	7.243	8.322	7.388	8.267	9.495	12.918	7.527	8.323	8.289	8.272	7.839
	14	12.142	5.739	7.937	7.617	7.998	6.536	7.622	8.011	7.69	8.925	6.958	7.464	6.907	6.36			12.169	10.232	15.471	7.577	7.846	9.189	7.891	7.979	8.168	5.691	8.396	8.53	10.579	7.735	7.57	8.953	7.98	8.15
	14.5	9.706	7.115	7.041	12.979	7.938	7.415	6.977	6.974	8.096	9.18	6.27	7.124	7.353	7.212			14.12	9.145	12.113	5.927	7.703	8.879	6.542	6.491	6.359	7.378	7.213	8.927	11.373	8.97	8.017	9.739	8.243	8.445
	15	12.075	7.655	5.831	8.893	6.229	5.597	7.563	7.085	7.963	9.178	7.248	5.865	7.312	7.318			12.032	11.878	13.13	7.3	7.978	9.257	8.243	6.069	5.846	7.554	7.431	9.417	11.346	9.294	5.964	9.37	9.358	8.546
	15.5	12.45	6.939	5.639	12.376	7.007	5.667	6.916	7.494	7.962	8.8	5.974	5.601	8.526	7.136			12.061	9.756	15.092	7.317	8.595	9.342	8.426	8.224	8.145	6.636	6.972	7.611	8.936	7.493	6.579	9.596	7.594	6.849
	16	10.379	5.063	7.537	9.58	8.775	8.016	7.3	6.23	7.488	6.355	6.719	7.397	7.97	6.634			11.532	7.768	11.255	6.131	7.176	9.191	6.11	6.93	7.805	7.735	7.838	8.286	10.064	8.083	8.552	9.584	7.837	9.341
	16.5	8.262	5.178	7.754	7.922	6.018	6.008	7.473	6.984	7.534	6.401	4.97	7.898	6.831	5.327			10.957	7.574	13.291	6.502	7.121	9.07	7.589	5.541	6.111	6.201	7.086	8.555	10.808	8.381	8.124	8.973	7.692	8.254
	17	8.262	7.739	6.001	6.31	8.013	6.952	6.631	7.852	8.188	8.329	4.642	5.284	7.612	6.095			11.376	7.816	15.127	9.105	7.492	9.861	7.93	7.88	8.839	6.312	7.175	6.672	9.555	8.258	8.075	8.158	8.854	7.571
	17.5	7.07	4.764	5.377	3.902	8.755	6.458	7.719	8.172	7.229	6.025	6.243	5.422	8.389	7.972			11.915	5.601	12.273	6.449	6.276	7.422	6.027	7.914	7.247	7.174	6.384	8.658	10.05	8.675	7.569	6.417	9.143	8.953
	18	4.633	4.722	7.793	4.069	7.841	5.852	6.307	6.275	7.534	5.413	4.275	7.137	7.037	5.644			5.982	5.645	13.422	8.938	8.671	5.24	5.584	6.296	6.667	8.039	6.922	6.431	11.793	7.172	5.983	9.155	8.883	7.261
	18.5	4.795	6.691	5.395	3.976	5.912	7.889	6.478	7.132	5.915	8.067	4.702	5.703	7.15	6.378			2.998	9.231	9.913	8.029	7.35	5.752	5.528	6.234	5.477	5.931	7.912	6.665	9.674	6.794	7.644	9.396	9.059	7.814
	19	8.864	6.236	4.846	5.917	7.991	7.602	7.95	7.275	7.873	8.468	4.315	5.573	6.728	6.464			5.084	7.289	6.209	7.008	8.681	4.818	8.265	7.661	8.145	6.069	6.974	7.889	10.701	8.928	7.898	9.001	7.64	8.452
	19.5	9.277	5.062	6.862	3.765	5.848	5.851	6.584	8.405	6.97	5.988	5.215	4.942	6.756	5.297			9.284	8.379	6.436	6.537	7.847	4.63	6.548	7.461	8.096	8.264	8.116	6.115	7.918	8.456	7.141	8.35	7.516	7.352
	20	8.989	4.914	5.543	3.808	6.547	5.72	6.523	6.984	5.53	7.411	7.239	5.288	9.182	6.262			6.718	5.656	6.266	6.847	7.427	6.641	5.506	6.467	6.336	8.116	7.068	8.35	7.4	6.856	5.966	7.143	9.447	6.716
	20.5	5.297	5.89	7.128	3.479	8.141	5.316	6.515	8.316	5.815	8.388	7.868	7.381	7.251	5.076			3.486	5.622	8.452	6.423	6.642	5.732	5.226	6.671	6.17	5.355	7.556	8.319	6.817	6.361	5.757	6.62	8.836	8.812
	21	4.637	5.409	5.863	3.804	8.308	6.167	7.034	6.001	8.073	6.471	7.726	5.164	6.927	4.792			3.091	6.869	13.84	7.123	6.572	4.978	7.893	6.921	7.062	5.806	7.272	9.031	8.327	8.525	8.295	7.808	8.952	8.503
	21.5	4.794	4.866	5.348	3.521	6.399	6.517	7.475	8.041	7.203	5.391	7.705	6.626	6.723	5.123			5.301	4.99	9.101	6.014	6.983	5.413	5.459	6.948	8.317	7.353	6.673	6.264	9.57	7.709	8.275	8.841	8.939	8.291
	22	6.888	5.804	7.783	3.735	7.271	7.227	7.01	7.083	5.861	9.431	5.804	5.619	7.495	7.236			6.175	5.533	11.434	7.89	6.826	4.614	6.942	5.942	6.615	5.192	7.611	5.639	5.884	7.924	7.845	7.114	9.282	8.147
	22.5	4.853	5.511	5.898	3.843	8.955	6.109	6.563	6.154	7.349	8.366	7.408	5.119	7.678	5.326			3.794	6.498	6.751	6.473	8.59	4.64	7.302	6.459	6.019	6.273	6.555	5.934	6.44	6.356	7.532	8.062	8.689	6.866
	23	4.631	7.079	5.993	3.966	6.653	5.614	7.589	7.647	6.472	5.413	5.239	4.8	7.263	5.435			3.559	4.664	7.266	6.318	6.76	5.111	5.278	6.131	5.538	7.576	6.833	6.595	7.649	6.126	5.833	9.141	7.328	8.305
	23.5	4.757	6.151	5.26	3.631	5.082	7.535	7.891	6.768	7.43	7.321	7.61	7.507	7.194	6.747			3.629	7.47	5.894	7.3	6.468	4.473	6.873	6.689	6.019	5.309	7.809	8.997	3.835	9.151	7.754	7.826	8.186	8.472
	24	4.582	3.328	6.163	3.961	7.014	6.635	6.815	7.757	6.403	7.976	7.226	4.507	6.496	6.641			4.023	7.859	8.291	5.934	6.271	4.546	5.433	6.915	4.943	7.366	6.65	9.267	4.59	7.853	7.39	6.505	9.527	7.644
	24.5	4.938	4.729	5.431	3.617	5.704	5.329	7.276	6.249	4.874	5.896	5.701	4.961	6.179	4.239			4.631	6.036	6.691	5.995	5.784	5.115	4.902	6.649	6.082	6.947	6.943	7.678	5.414	6.097	5.392	6.038	7.857	7.036
	25	4.963	6.113	4.884	3.196	7.509	5.209	6.119	6.15	5.272	5.342	4.684	8.208	5.692	4.898			4.537	6.086	6.079	5.702	6.288	4.311	5.289	5.419	7.316	5.211	5.823	5.949	4.821	5.602	5.112	5.895	6.169	7.247
	25.5	4.873	6.381	4.808	3.68	5.612	7.654	5.929	7.378	5.202	5.455	5.3	5.056	6.519	6.414			6.654	6.869	6.138	6.138	6.185	4.57	4.933	5.222	7.728	5.305	5.445	6.004	4.175	5.303	6.499	5.786	6.889	6.096
	26	4.469	4.969	6.089	4.195	6.012	4.944	5.558	5.746	5.696	6.428	7.579	5.037	6.045	4.071			4.772	5.581	6.285	7.57	5.536	4.555	7.224	6.56	6.138	5.464	6.364	5.441	4.173	7.986	7.622	7.662	6.328	5.979
	26.5	4.531	4.708	5.054	5.949	5.346	4.301	5.694	5.941	5.221	5.195	5.804	6.905	8.081	4.536			4.701	5.555	5.756	5.937	8.465	4.269	6.503	7.147	5.679	4.968	6.077	5.915	3.78	6.925	6.178	6.511	7.288	5.684
	27	4.488	5.036	5.242	6.073	5.239	4.964	6.673	6.81	4.522	5.25	5.541	5.677	6.957	6.065			4.802	5.407	6.91	5.616	7.351	6.306	5.512	6.182	5.096	4.591	5.64	5.63	3.965	8.218	7.984	6.087	8.585	9.279
	27.5	4.31	5.254	5.143	3.548	6.125	4.486	6.116	6.357	5.427	8.356	6.47	5.202	7.833	4.806			4.684	5.571	5.677	5.503	6.465	4.472	5.106	5.919	5.773	6.712	5.753	7.454	6.142	5.941	7.43	5.813	7.616	8.704
	28	6.539	4.861	5.984	3.6	5.497	4.351	5.211	5.469	5.915	6.225	5.455	7.703	6.589	5.321			4.526	4.724	5.562	5.114	6.551	4.455	4.76	7.082	5.254	5.592	6.391	7.57	3.759	5.781	5.669	5.976	7.437	6.781
	28.5	7.874	4.537	4.731	4.283	5.193	4.39	6.202	5.436	5.126	5.265	4.987	4.786	6.375	4.337			4.519	4.506	6.046	7.215	5.941	4.242	5.557	5.755	5.451	5.5	6.149	5.603	4.066	5.277	5.514	5.768	7.446	6.671
	29	5.004	4.87	5.04	3.798	5.128	3.922	6.338	5.753	7.315	7.492	4.774	8.189	5.631	4.452			4.116	5.522	6.099	7.777	7.609	4.37	5.514	5.709	5.057	7.115	5.598	5.872	4.118	5.734	5.885	5.779	7.068	6.896
	29.5	4.457	4.825	7.168	5.117	5.262	7.24	6.082	5.088	6.694	5.655	7.513	5.565	6.897	4.979			4.869	6.855	5.556	6.308	7.897	4.635	5.2	6.609	5.759	5.863	5.298	5.637	4.425	8.478	5.791	9.08	7.386	8.047
	30	4.621	4.968	4.947	4.391	5.261	4.653	6.175	5.546	5.227	6.003	5.978	4.644	6.032	4.684			5.929	5.895	5.959	6.435	6.066	4.333	7.824	7.011	7.744	5.301	7.176	7.906	4.01	7.835	6.277	8.48	7.415	6.089
	30.5	4.138	5.472	5.09	3.88	7.292	4.773	5.597	6.63	5.316	6.985	5.045	5.155	6.557	6.709			4.398	5.41	8.062	5.44	6.118	4.6	5.946	5.929	6.303	4.672	6.24	5.47	6.378	5.808	7.742	6.403	6.573	6.539
	31	4.882	4.795	6.86	3.647	5.739	4.392	5.417	7.534	5.202	6.233	4.818	5.198	7.024	5.432			4.333	5.727	6.229	5.695	7.762	6.576	5.144	5.601	5.996	6.269	5.923	6.127	4.69	6.179	7.589	6.027	7.443	7.873
	31.5	6.933	4.517	5.751	6.195	5.766	4.495	5.697	5.464	6.263	5.473	5.842	4.859	6.573	5.047			4.426	5	5.951	5.789	7.319	5.398	6.536	5.811	5.931	5.707	5.53	5.387	4.047	5.443	5.934	5.779	7.04	6.949
	32	7.389	6.926	5.439	7.522	5.853	4.508	5.675	5.798	5.431	7.566	5.472	5.078	6.446	4.461			8.147	7.286	5.828	7.491	7.318	7.309	5.701	6.062	6.418	5.13	6.191	7.849	4.326	7.783	5.377	6.287	8.084	6.202
	32.5	4.466	4.448	5.192	6.746	7.167	4.192	6.206	5.514	5.036	5.77	5.551	7.658	7.813	4.613			7.513	8.347	5.43	5.504	6.251	6.855	5.123	5.791	5.205	6.286	6.169	5.358	4.35	5.569	5.199	5.773	6.797	8
	33	4.166	5.072	6.711	4.136	6.537	6.174	7.037	6.644	4.788	8.18	6.588	4.665	6.676	5.798			6.017	5.241	5.106	5.918	7.343	4.8	7.754	5.51	5.453	5.169	7.066	5.489	4.712	6.017	5.889	4.794	6.68	6.248
	33.5	6.106	7.118	5.052	4.02	5.603	4.924	5.865	5.937	7.34	6.973	5.475	5.241	6.357	6.872			5.754	6.589	7.138	6.257	6.662	5.373	5.316	6.794	6.518	5.718	6.18	8.685	7.189	5.489	5.703	7.071	6.849	6.62
	34	7.112	5.349	6.624	4.724	5.666	4.478	5.973	5.84	5.438	5.71	5.783	5.693	6.899	4.897			7.365	5.153	6.23	7.861	6.259	5.135	5.289	5.669	5.186	5.24	6.721	6.465	3.86	7.916	7.714	6.682	8.867	6.897
	34.5	4.727	4.93	5.802	9.197	6.703	6.084	5.877	5.261	5.273	6.234	6.287	4.604	6.993	6.697			5.995	6.687	6.34	6.302	7.399	5.237	7.658	5.951	5.012	6.902	6.975	5.931	4.065	6.008	6.166	5.951	7.549	6.565
	35	4.8	6.828	5.546	8.189	7.675	4.991	6.278	6.886	6.114	6.96	5.121	6.527	6.462	4.898			5.691	5.665	6.493	6.846	8.118	6.749	5.582	6.326	6.77	6.515	6.792	6.004	4.453	7.73	5.582	7.626	6.135	8.278
	35.5	5.183	5.109	7.066	10.534	6.517	4.494	6.236	5.69	7.258	5.457	5.168	4.719	6.831	7.622			7.623	5.784	6.66	6.965	6.489	4.836	7.16	5.9	7.827	6.521	6.977	7.882	5.859	5.959	6.793	6.125	7.177	6.582
	36	7.697	6.506	7.023	12.043	6.064	6.379	5.971	6.369	5.408	7.565	5.76	7.09	8.005	4.594			7.45	6.372	7.596	9.116	7.017	8.559	7.202	7.156	5.694	6.993	8.051	5.078	4.594	8.781	7.755	9.422	8.732	7.383
	36.5	8.07	7.645	8.399	9.731	7.096	5.277	7.039	6.727	6.473	6.143	7.236	6.934	7.302	7.406			14.351	9.739	14.062	9.316	9.236	8.637	8.16	6.001	5.577	5.917	6.929	8.556	4.334	6.498	6.309	9.112	8.172	8.381
	37	12.065	6.927	7.764	10.107	6.427	4.998	7.208	6.315	6.633	8.762	7.227	7.501	7.971	6.667			11.197	10.794	16.391	8.933	8.203	9.346	8.887	6.397	7.716	7.778	8.215	6.287	10.616	7.927	8.19	7.071	9.28	9.327
	37.5	9.572	7.6	7.179	10.715	8.73	6.397	7.39	7.979	7.107	8.821	6.939	7.048	7.871	6.23			14.936	12.447	15.741	8.584	8.533	9.983	8.66	8.226	6.938	7.063	8.131	8.953	10.951	6.965	8.274	9.305	7.918	7.261
	38	12.36	6.743	7.284	9.906	7.637	6.585	6.718	8.227	7.904	7.052	7.267	6.465	7.524	7.832			12	10.137	11.009	6.175	8.05	9.852	8.784	7.13	6.391	6.337	7.719	8.885	12.454	8.329	6.596	9.003	8.599	8.308
	38.5	10.561	7.516	5.977	11.961	8.203	6.458	7.163	8.159	7.267	8.757	7.468	6.347	7.659	6.164			10.704	9.352	16.168	8.899	7.468	10.451	8.141	6.445	7.421	7.402	7.342	8.356	12.193	8.962	8.2	10.148	7.331	9.521
	39	12.253	5.479	5.953	7.665	7.693	6.168	7.277	8.095	6.677	6.884	7.999	7.475	8.266	6.732			13.042	8.904	15.137	7.987	8.376	9.059	8.03	7.738	6.485	7.446	7.739	6.815	10.188	7.297	8.048	8.928	7.905	8.998
	39.5	9.103	6.264	7.791	10.796	7.163	5.706	7.209	8.529	6.745	8.698	7.439	7.264	7.731	7.559			9.379	7.909	15.055	6.272	7.068	10.595	7.993	6.329	6.041	7.119	7.038	9.03	9.863	7.989	6.47	9.041	9.464	7.914
	40	7.972	7.366	7.876	7.398	6.848	6.334	8.057	8.33	8.393	8.652	7.226	5.561	8.216	5.255			13.672	7.555	12.874	6.327	7.907	9.257	7.021	6.923	7.553	7.154	5.544	6.416	11.723	8.393	8.191	8.737	9.292	8.281
	40.5	4.163	6.004	6.144	4.373	7.738	7.041	7.974	6.845	7.716	5.85	7.266	6.818	6.705	6.5			13.522	7.492	14.388	8.088	7.033	8.517	5.514	7.44	7.669	7.424	7.712	8.702	8.479	6.92	7.632	7.098	8.146	8.31
	41	7.668	5.461	5.88	4.232	6.224	6.361	6.639	7.876	7.309	8.62	7.229	7.998	7.326	6.534			8.024	5.34	15.027	8.178	8.979	6.999	7.502	6.977	6.883	7.276	5.709	6.842	9.725	9.071	8.552	8.62	8.363	8.53
	41.5	10.219	7.894	7.887	4.027	7.676	7.823	7.661	7.319	8.19	8.388	6.715	6.778	8.441	6.491			6.812	7.018	13.29	6.041	8.576	5.237	8.114	6.466	8.666	5.908	6.956	5.7	9.009	6.83	6.37	8.885	7.76	8.325
	42	4.934	7.438	5.663	3.95	7.058	5.924	7.095	6.381	6.902	6.701	6.772	7.593	7.003	6.229			5.575	7.701	13.853	6.267	7.116	6.741	5.653	6.601	7.659	7.542	5.82	7.336	10.308	7.719	8.176	9.413	7.489	7.622
	42.5	5.363	5.223	4.992	3.997	7.942	6.308	6.17	8.509	6.836	6.419	6.696	5.632	6.479	5.555			5.703	5.28	15.631	8.221	8.918	8.94	6.977	6.376	6.017	8.25	5.537	6.436	10.491	9.138	6.263	8.406	9.599	8.97
	43	5.927	6.119	7.778	4.323	6.72	5.951	7.353	7.587	7.783	8.122	7.41	4.68	6.822	7.146			6.118	5.491	12.201	7.398	7.61	6.486	5.922	7.288	6.495	5.29	7.501	10.434	6.819	8.302	5.934	8.247	8.769	7.352
	43.5	6.918	6.302	5.775	3.86	7.613	6.381	7.235	7.188	7.267	8.952	6.674	7.47	8.354	6.795			7.993	4.954	7.428	6.119	6.632	4.808	5.573	7.221	7.066	7.016	6.224	6.675	6.146	6.634	7.456	7.362	8.43	8.282
	44	7.367	6.762	7.1	4.6	9.212	7.19	7.57	6.412	6.452	8.513	6.665	4.939	7.97	5.833			6.577	6.399	5.804	5.854	6.811	4.713	7.51	6.603	8.327	7.383	4.853	6.069	3.94	6.621	8.278	6.536	7.814	8.339
	44.5	5.181	4.801	5.476	6.493	6.902	5.575	6.541	7.899	7.182	6.869	7.117	5.621	6.809	6.488			6.132	6.876	5.543	7.181	8.03	4.685	8.124	5.855	6.43	5.66	5.105	6.553	3.917	7.421	7.804	6.762	9.545	8.731
	45	5.408	6.121	8.711	6.196	6.666	5.448	7.062	6.699	7.695	5.89	6.352	5.697	7.795	5.571			6.729	6.579	7.919	8.045	8.142	6.553	5.442	5.923	5.75	6.072	5.402	8.734	4.432	8.368	7.773	9.581	7.888	7.044
	45.5	5.046	5.569	5.603	4.116	6.169	6.54	7.954	6.091	7.738	6.283	5.834	5.239	7.079	6.306			7.956	5.697	6.18	5.99	6.995	5.888	5.703	6.848	6.938	6.762	6.664	5.749	6.571	6.695	6.11	8.956	7.838	6.694
	46	5.075	4.803	7.067	4.092	7.749	7.268	7.024	6.07	7.152	5.929	6.864	6.804	6.554	5.361			6.07	5.167	6.782	5.683	8.174	4.849	5.361	6.709	7.675	6.027	4.487	5.575	6.464	6.305	6.334	6.717	8.622	8.685
	46.5	4.773	5.623	5.859	3.998	7.034	5.396	7.196	7.831	8.058	9.183	6.859	5.342	7.453	7.072			7.547	5.078	11.742	7.112	6.013	4.632	8.046	6.305	7.946	7.055	4.966	7.819	7.312	8.134	7.477	7.207	9.476	8.078
	47	7.526	4.998	5.297	3.482	7.312	7.543	6.445	7.441	7.695	8.352	5.893	5.489	6.786	5.66			8.261	7.63	7.054	7.432	6.711	4.578	5.182	6.627	5.972	5.262	5.15	5.634	5.862	6.795	7.546	8.574	8.506	8.528
	47.5	4.607	4.431	4.358	3.527	8.614	6.654	6.728	6.645	7.312	7.418	6.45	5.738	7.754	6.049			6.673	7.128	6.378	6.804	5.943	4.735	5.298	6.138	7.982	5.92	5.608	7.522	3.524	5.928	5.46	8.252	7.378	7.694
	48	4.813	4.084	5.484	3.577	6.566	6.993	6.859	7.275	6.523	5.687	7.658	5.275	6.2	7.622			5.643	5.64	6.207	6.395	7.866	4.5	4.877	6.249	5.613	6.905	3.645	7.837	3.449	8.16	5.048	6.126	7.045	8.379
		15.667	16.577											15.667				14.498	13.863	12.978											14.498	13.863	12.978	13.628*
		12.873	15.585											12.873				10.103	9.157	10.849											10.103	9.157	10.849	14.139*
		12.638	16.691											12.638				12.509	11.971	9.113											12.509	11.971	9.113	12.578*
		12.824	11.183											12.824				10.077	8.533	10.752											10.077	8.533	10.752	10.332*
		12.692	14.23											12.692				9.676	9.265	9.619											9.676	9.265	9.619	10.66*
		12.807	14.003											12.807				12.817	14.176	9.24											12.817	14.176	9.24	10.668*
		12.209	12.011											12.209				10.566	11.687	12.239											10.566	11.687	12.239	14.271*
		12.907	12.922											12.907				9.991	8.798	9.978											9.991	8.798	9.978	13.722*
		11.327	12.455											11.327				9.22	9.026	12.535											9.22	9.026	12.535	12.265*

## Sheet: h EE 
		Control																Drp1 cKO
		1	2	3	4	5	6	7	8	9	10	11	12	13	14			1	2	3	4	5	6	7	8	9	10	11	12	13	14	15	16	17	18
	Total	315.176	278.262	294.267	282.768	323.132	274.692	314.671	320.767	312.296	334.053	286.789	289.322	337.879	282.526			351.121	327.997	419.074	327.572	352.579	294.921	312.865	305.762	313.582	305.341	319.499	338.45	320.268	349.32	327.997	359.788	377.55	364.05
	Light	127.219	129.079	134.072	123.849	147.803	122.68	144.189	146.689	139.531	156.214	131.79	141.083	164.21	132.713			139.204	140.334	149.339	150.173	166.417	120.416	141.831	143.601	146.37	146.132	159.475	161.487	121.883	167.479	156.969	163.608	179.758	171.825
	Dark	187.958	149.183	160.195	158.919	175.329	152.012	170.482	174.078	172.765	177.839	155	148.239	173.668	149.814			211.917	187.662	269.734	177.399	186.161	174.505	171.034	162.161	167.212	159.208	160.024	176.964	198.385	181.841	171.029	196.179	197.792	192.226

## Sheet: i. EE kcal per day
		Control															Drp1 cKO
		1	2	3	4	5	6	7	8	9	10	11	12	13	14		1	2	3	4	5	6	7	8	9	10	11	12	13	14	15	16	17	18
	19.61	315.176
	18.55		278.262
	17.36			294.267
	18.35				282.768
	20.32					323.132
Control	22.02						274.692
	17.16							314.671
	19.59								320.767
	18.96									312.296
	18.85										334.053
	19.18											286.789
	18.61												289.322
	18.92													337.879
	19.69														282.526
	18.32																351.121
	21.36																	327.997
	16.59																		419.074
	18.52																			327.572
	18.58																				352.579
	17.09																					294.921
	22.87																						312.865
Drp1 cKO	17.72																							305.762
	17.68																								313.582
	18.31																									305.341
	23.1																										319.499
	17.86																											338.45
	19.43																												320.268
	19.79																													349.32
	20.23																														327.997
	17.09																															359.788
	19.97																																377.55
	20.4																																	364.05

## Sheet: j. vO2
vO2
		DRP1+/+-AgRP-cre:ERT2	DRP1fl/fl-AgRP-cre:ERT2
	1	1325.7	1484.96
	2	1174	1360.49
	3	1237	1763.71
	4	1363.06	1358.55
	5	1159.05	1480.67
	6	1337.56	1242.74
	7	1350.25	1316.04
	8	1308.36	1292.97
	9	1317.09	1325.78
	10	1077.38	1262.24
	11	1096.57	1192.65
	12	1301.08	1187.54
	13	1338.46	1269.06
	14	1046.62	1317.25
	15		1245.7
	16		1380.57
	17		1392.66
			1339.81

[truncated: 2 more sheets: k. vCO2, l. RER]
