# Supplementary material for: Drp1 is required for AgRP neuronal activity and feeding
Source: eLife. 2021 Mar 9;10:e64351. doi: 10.7554/eLife.64351 (PMC7946429; doi:10.7554/eLife.64351)
Supplement: Figure 7—figure supplement 1—source data 1. [file elife-64351-fig7-figsupp1-data1.xlsx]

## Sheet: a. Total ghrelin
		Control-Fed								Drp1 cKO-fed							Control-Fasted								Drp1 cKO-fasted
		3939.71	4219.92	6693.26	5047.78	7508.56	3376.52	4948.19		4124.06	7329.57	7380.44	5828.92	7192.5	6955.88		11467	7363.46	7766.29	20445.8	7964.16	12854.6	9908.83		8619.43	11234.6	9073.72	22297.6	10362.4	15129.6

## Sheet: b. active ghrelin
	Control-Fed							Drp1 cKO-fed							Control-Fasted							Drp1 cKO-fasted
	355.8	443.8	270.1	382.4	412.9	326.8		530.5	347.1	288.4	259.2	251.4	249.9		568.6	522	671.3	638.2	552.9	711.5		504.4	574.3	423.8	710	572.2	778.6
