# Supplementary material for: Drp1 is required for AgRP neuronal activity and feeding
Source: eLife. 2021 Mar 9;10:e64351. doi: 10.7554/eLife.64351 (PMC7946429; doi:10.7554/eLife.64351)
Supplement: Figure 7—source data 1. [file elife-64351-fig7-data1.xlsx]

## Sheet: g. %Fos positive Agrp
	Control-Ghr					Drp1 cKO-Ghr
	1	2	3	4		1	2	3	4	5
	79.2055	75.9493	80.8295	65.4147		21.8207	30.7925	36.2749	24.8002	45.5221

## Sheet: h. #AgRP neurons in ARC
	Control-Ghr					Drp1 cKO-Ghr
	1	2	3	4		1	2	3	4	5
	217.25	109	141.667	144		160.667	135	96.25	172	171.333

## Sheet: i. Ghr food intake
		DRP1+/+;AgRPCreERT2-CTL										DRP1+/+;AgRPCreERT2-GHR										DRP1fl/fl;AgRPCreERT2-CTL								DRP1fl/fl;AgRPCreERT2-GHR
		1	2	3	4	5	6	7	8	9		1	2	3	4	5	6	7	8	9		1	2	3	4	5	6	7		1	2	3	4	5	6	7
	0.5	0.1	0.1	0.1	0.2	0.1	0.1	0.2	0.1	0.1		0.3	0.2	0.2	0.4	0.8	0.6	0.7	0.7	0.4		0.1	0.1	0.1	0.2	0.1	0.1	0.2		0.2	0.2	0.1	0.2	0.3	0.1	0.2
	1	0.1	0.1	0.1	0.2	0.1	0.1	0.2	0.2	0.2		0.3	0.2	0.3	0.5	0.9	0.6	0.9	1.1	0.5		0.2	0.1	0.1	0.3	0.2	0.2	0.3		0.3	0.2	0.2	0.3	0.3	0.1	0.3
	2	0.1	0.2	0.3	0.4	0.3	0.2	0.2	0.2	0.3		0.4	0.3	0.4	0.5	1	0.6	0.9	1.4	0.5		0.3	0.2	0.1	0.3	0.3	0.3	0.4		0.3	0.2	0.3	0.4	0.4	0.3	0.3
	4	0.2	0.4	0.4	0.5	0.4	0.3	0.3	0.3	0.3		0.5	0.5	0.5	0.7	1.1	0.6	0.9	1.6	0.6		0.4	0.2	0.1	0.4	0.3	0.4	0.5		0.4	0.3	0.4	0.5	0.5	0.4	0.4

## Sheet: j. membrane potential
		Control																					Drp1 cKO
		1	2	3	4	5	6	7	8	9	10	11	12	13	14	15	16	17	18	19	20		1	2	3	4	5	6	7	8	9	10	11	12	13	14	15	16	17	18	19
	Resting	-47.3	-48.1	-47.1	-46.2	-48.2	-45.6	-47.1698	-47.8056	-50.0937	-47	-46.2006	-51	-43.4	-44.1	-41.2	-48.9	-47.196	-45.6	-45.6	-45.1077		-43.4571	-49.2545	-45.16	-47.7125	-49.3707	-48.1168	-43.5	-47.8	-45.2	-47.8	-49.3707	-43.5	-48.4	-42.2388	-45.6	-42.5963	-46	-48.1168	-42.773
	Ghrelin	-44.339	-44.6	-46.1	-45.3	-46.9	-44.52	-43.2132	-44.2696	-45.1268	-46.0695	-44.9125	-46.8863	-38.5917	-36.6	-36.3853	-45.1416	-43.9687	-44.5193	-43.022	-44.6746		-42.3777	-49	-43.65	-48.2525	-49.2	-48.5959	-42.3777	-47.9	-43.7	-48.1	-49.2	-42	-47.5	-43.507	-44.1	-43.3561	-43.4	-48.5959	-43.0486
	Washout	-46.7136	-43.0673	-46.5379	-47.2	-41.6422	-45.6384	-45.9138	-46.7136	-43.0673	-46.5379	-47.2486	-41.6422	-41.4	-42	-44.5	-45.9	-48.4	-45.6384	-46.2	-45.0647		-46.6	-48.9	-44.4	-49.6185	-48.3921	-48.9308	-46.8898	-47.5	-44.4	-49.6185	-48.3921	-40.2697	-46.3	-42.7945	-45	-42.4129	-40.064	-48.9308	-45.2

## Sheet: k. normalized AP firing
		Control																							Drp1 cKO
		1	2	3	4	5	6	7	8	9	10	11	12	13	14	15	16	17	18	19	20	21	22		1	2	3	4	5	6	7	8	9	10	11	12	13	14	15	16	17	18	19	20
	Resting	10.5203	185.489	112.124	64.5751	28.8615	188.95	113.508	103.126	10.5203	200.024	128.965	64.5751	28.8385	107.971	87.8997	41.96	194.487	96.8973	246.396	16.1265	54.6777	113.508		58.8579	53.2664	24.1971	136.477	19.1288	132.332	58.8579	146.654	24.1808	136.207	19.1288	195.065	269.765	63.4194	66.4604	141.749	177.309	65.7247	78.8858	132.332
	Ghrelin	143.962	303.842	124.582	146.73	117.661	221.479	126.197	440.883	144.192	299.92	124.352	146.73	101.742	221.479	240.167	94.5904	313.532	198.639	272.697	21.4558	180.644	126.197		83.382	130.468	77.0058	138.807	28.9385	151.721	83.5439	163.821	63.2723	138.807	31.1456	212.232	268.147	94.1727	15.205	269.275	157.445	115.411	25.1779	151.721
	Washout	21.9172	135.656	122.506	26.9928	140.501	265.083	109.817	119.045	21.9172	135.656	122.679	15.7804	140.501	265.083	181.336	61.599	120.429	118.353	288.615	2.99689	57.9307	109.817		10.153	59.3484	1.12811	160.388	19.2923	123.929	10.153	54.9341	2.9429	160.388	19.2923	44.6339	291.101	103.819	20.7637	59.0051	171.546	62.7818	20.6003	123.929
